# Supplementary material
Source: HighWire-hosted journal article supplement (https://erj.ersjournals.com/content/57/4/2100048)
Supplement: inline-supplementary-material-2 [file inline-supplementary-material-2.pdf]

## Supplementary material

### *Systematic review*

Two experienced external librarians (TV, KT) designed and ran a search strategy using MeSH terms and keywords for each clinical question, in collaboration with the methodologists (PCG, MLC, JDC).

The PubMed platform was used to search MEDLINE. EMBASE,

The search was limited to randomised clinical trials published in English language. All searches were performed systematically through September 2021.

The search retrieved 6,337 records after removal of duplicates with a further 6,303 citations excluded through title and abstract screening. A search of MedRxiv database identified 11 further preprints. 10 citations were retained from the original guidelines. A total of 55 references were included in the evidence summaries and all were assessed in full text by at least two authors who determined inclusion by consensus; disagreements were resolved by consultation to guideline panel chairs. All authors monitored the literature up to September 2021.

### *Assessment of the level of evidence and degree of recommendations*

The panel selected outcomes of interest for each clinical question a priori, based on their relative importance to adult patients with COVID-19 and to clinical decision making. Following the GRADE approach, outcomes were rated as “not important”, “important” or “critical” for clinical decision making through an online vote of the entire panel. Only outcomes that were considered important or critical were subsequently used to formulate recommendations.

A methodology group composed of one chair (JDC) and two members (PCG and MLC) extracted the data in duplicate from relevant publications reporting important or critical outcomes and pooled them, whenever applicable, using RevMan 5 software version 5.3. The process of literature search, data extraction and reporting were supervised by an experienced ERS methodologist (TT).

We followed the GRADE approach to assess the confidence in the evidence (quality) and the degree of recommendations. This approach specifies four categories of quality (high, moderate, low and very low) that are applied to a body of evidence and not on individual studies. The body of evidence was evaluated based primarily on risk of bias, precision, consistency, directness of evidence and risk of publication bias.

Recommendations are graded as strong or conditional after considering the quality of the evidence, the balance of desirable and undesirable consequences of compared management options, the assumptions about the relative importance of outcomes, the implications for resource use, and the acceptability and feasibility of implementation. Evidence summaries of findings (SoF tables) and Evidence to Decisions (EtD) frameworks were generated by the methodology group for each clinical question using the GRADEpro Guideline Development Tool. Based on these formats, the panel formulated the clinical recommendations and decided on their strength by consensus and, if required, by voting. Following the GRADE approach, strong recommendations are worded as “we recommend”, while conditional recommendations are worded as “we suggest”.

## Evidence summaries of findings (SoF tables)

**PICO Question 1:** Are Corticosteroids, in comparison to standard care (defined as control, placebo or normal background therapy), beneficial in the treatment for COVID-19?

**Setting:** Hospitalised patients

### Bibliography:

1. Effect of Dexamethasone on Days Alive and Ventilator-Free in Patients With Moderate or Severe Acute Respiratory Distress Syndrome and COVID-19: The CoDEX Randomised Clinical Trial. Tomazini BM, *et al.* JAMA. 2020 Sep 2;324(13):1-11. doi: 10.1001/jama.2020.17021. Online ahead of print.
2. Association Between Administration of Systemic Corticosteroids and Mortality Among Critically Ill Patients With COVID-19: A Meta-analysis. WHO Rapid Evidence Appraisal for COVID-19 Therapies (REACT) Working Group, Sterne JAC, *et al.* JAMA. 2020 Sep 2;324(13):1-13. doi: 10.1001/jama.2020.17023. Online ahead of print.
3. Dexamethasone in Hospitalised Patients with COVID-19 - Preliminary Report. RECOVERY Collaborative Group, Horby P, *et al.* N Engl J Med. 2020 Jul 17;NEJMoa2021436. doi: 10.1056/NEJMoa2021436. Online ahead of print.
4. Effect of Hydrocortisone on 21-Day Mortality or Respiratory Support Among Critically Ill Patients With COVID-19: A Randomised Clinical Trial. Dequin PF, *et al.* JAMA. 2020 Sep 2;324(13):1-9. doi: 10.1001/jama.2020.16761. Online ahead of print.
5. Effect of Hydrocortisone on Mortality and Organ Support in Patients With Severe COVID-19: The REMAP-CAP COVID-19 Corticosteroid Domain Randomised Clinical Trial. Writing Committee for the REMAP-CAP Investigators, Angus DC, *et al.* JAMA. 2020 Sep 2;324(13):1317-29. doi: 10.1001/jama.2020.17022. Online ahead of print.
6. GLUCOCVID: A controlled trial of methylprednisolone in adults hospitalised with COVID-19 pneumonia Luis Corral, *et al.* medRxiv 2020.06.17.20133579; doi: <https://doi.org/10.1101/2020.06.17.20133579>
7. Intravenous methylprednisolone pulse as a treatment for hospitalised severe COVID-19 patients: results from a randomised controlled clinical trial. Edalatfard M, *et al.* Eur Respir J 2020; in press (<https://doi.org/10.1183/13993003.02808-2020>)

| Certainty assessment |              |              |               |              |             |                      | No of patients  |                                                                          | Effect            |                   | Certainty | Importance |
|----------------------|--------------|--------------|---------------|--------------|-------------|----------------------|-----------------|--------------------------------------------------------------------------|-------------------|-------------------|-----------|------------|
| No of studies        | Study design | Risk of bias | Inconsistency | Indirectness | Imprecision | Other considerations | Corticosteroids | Standard care (defined as control, placebo or normal background therapy) | Relative (95% CI) | Absolute (95% CI) |           |            |

#### Mortality

|   |                   |             |             |             |                      |      |                  |                   |                        |                                               |                  |          |
|---|-------------------|-------------|-------------|-------------|----------------------|------|------------------|-------------------|------------------------|-----------------------------------------------|------------------|----------|
| 6 | randomised trials | not serious | not serious | not serious | serious <sup>a</sup> | none | 633/2558 (24.7%) | 1271/4700 (27.0%) | OR 0.74 (0.53 to 1.04) | 65 fewer per 1,000 (from 120 fewer to 2 more) | ⊕⊕⊕○<br>MODERATE | CRITICAL |
|---|-------------------|-------------|-------------|-------------|----------------------|------|------------------|-------------------|------------------------|-----------------------------------------------|------------------|----------|

#### Hospital length of stay (days)

|   |                   |             |             |             |                      |      |      |      |   |                    |                  |           |
|---|-------------------|-------------|-------------|-------------|----------------------|------|------|------|---|--------------------|------------------|-----------|
| 1 | randomised trials | not serious | not serious | not serious | serious <sup>a</sup> | none | 2104 | 4321 | - | median 1 day lower | ⊕⊕⊕○<br>MODERATE | IMPORTANT |
|---|-------------------|-------------|-------------|-------------|----------------------|------|------|------|---|--------------------|------------------|-----------|

#### Need for ICU admission

|   |                   |             |             |             |                      |      |                 |                 |                        |                                               |                  |          |
|---|-------------------|-------------|-------------|-------------|----------------------|------|-----------------|-----------------|------------------------|-----------------------------------------------|------------------|----------|
| 2 | randomised trials | not serious | not serious | not serious | serious <sup>b</sup> | none | 116/1836 (6.3%) | 296/3667 (8.1%) | OR 0.70 (0.56 to 0.88) | 23 fewer per 1,000 (from 34 fewer to 9 fewer) | ⊕⊕⊕○<br>MODERATE | CRITICAL |
|---|-------------------|-------------|-------------|-------------|----------------------|------|-----------------|-----------------|------------------------|-----------------------------------------------|------------------|----------|

#### Adverse effects

| Certainty assessment |                   |              |               |              |                      |                      | No of patients  |                                                                          | Effect                 |                                                    | Certainty        | Importance |
|----------------------|-------------------|--------------|---------------|--------------|----------------------|----------------------|-----------------|--------------------------------------------------------------------------|------------------------|----------------------------------------------------|------------------|------------|
| No of studies        | Study design      | Risk of bias | Inconsistency | Indirectness | Imprecision          | Other considerations | Corticosteroids | Standard care (defined as control, placebo or normal background therapy) | Relative (95% CI)      | Absolute (95% CI)                                  |                  |            |
| 4                    | randomised trials | not serious  | not serious   | not serious  | serious <sup>b</sup> | none                 | 14/398 (3.5%)   | 12/350 (3.4%)                                                            | OR 1.09 (0.37 to 3.18) | <b>3 more per 1,000</b> (from 21 fewer to 67 more) | ⊕⊕⊕○<br>MODERATE | CRITICAL   |

#### Mortality- mechanical ventilation subgroup

|   |                   |             |             |             |                      |      |                 |                  |                        |                                                      |                  |          |
|---|-------------------|-------------|-------------|-------------|----------------------|------|-----------------|------------------|------------------------|------------------------------------------------------|------------------|----------|
| 7 | randomised trials | not serious | not serious | not serious | serious <sup>c</sup> | none | 222/678 (32.7%) | 425/1025 (41.5%) | OR 0.70 (0.48 to 1.01) | <b>83 fewer per 1,000</b> (from 161 fewer to 2 more) | ⊕⊕⊕○<br>MODERATE | CRITICAL |
|---|-------------------|-------------|-------------|-------------|----------------------|------|-----------------|------------------|------------------------|------------------------------------------------------|------------------|----------|

#### Mortality - oxygen use

|   |                   |             |             |             |                      |      |                  |                  |                        |                                                      |                  |          |
|---|-------------------|-------------|-------------|-------------|----------------------|------|------------------|------------------|------------------------|------------------------------------------------------|------------------|----------|
| 1 | randomised trials | not serious | not serious | not serious | serious <sup>c</sup> | none | 298/1279 (23.3%) | 682/2604 (26.2%) | OR 0.86 (0.73 to 1.00) | <b>28 fewer per 1,000</b> (from 56 fewer to 0 fewer) | ⊕⊕⊕○<br>MODERATE | CRITICAL |
|---|-------------------|-------------|-------------|-------------|----------------------|------|------------------|------------------|------------------------|------------------------------------------------------|------------------|----------|

#### Mortality- hospitalised no oxygen

|   |                   |             |             |             |                      |      |                |                  |                        |                                                    |                  |          |
|---|-------------------|-------------|-------------|-------------|----------------------|------|----------------|------------------|------------------------|----------------------------------------------------|------------------|----------|
| 1 | randomised trials | not serious | not serious | not serious | serious <sup>b</sup> | none | 89/501 (17.8%) | 145/1034 (14.0%) | OR 1.32 (0.99 to 1.77) | <b>37 more per 1,000</b> (from 1 fewer to 84 more) | ⊕⊕⊕○<br>MODERATE | CRITICAL |
|---|-------------------|-------------|-------------|-------------|----------------------|------|----------------|------------------|------------------------|----------------------------------------------------|------------------|----------|

CI: Confidence interval; OR: Odds ratio

#### Explanations

- a. No statistically significant difference. Confidence intervals not provided but likely to include both beneficial and detrimental effect of treatment
- b. wide confidence interval that includes both beneficial and detrimental effect
- c. Wide confidence interval includes the possibility of no effect of treatment

N.B. Mortality, Mortality (mechanical ventilation subgroup), Mortality (oxygen use), Mortality (hospitalised no oxygen), Hospital length of stay, Need for ICU admission and Adverse events were the measurable endpoints found for corticosteroids.

Additional endpoints not included in the evidence table which were searched for but were either not studied or data was not found in an extractable format were; Clinical resolution or cure (also includes the reverse i.e patients not cured); Time to clinical improvement or resolution on an ordinal scale; Requirement for oxygen; Hospital admission; Ordinal scale or clinical status at day 28; ICU length of stay; Need for non-invasive ventilation; Deterioration in those not requiring ventilation at start of treatment; DLCO and HRCT at 28 days and 3 months (and 6months); Severity of symptoms; Improvement in oxygen saturations or arterial blood gases; Relapse; Viral clearance (negative SARS-CoV-2 test) and Duration of fever.

**PICO Question 2:** Is anti-IL-6 or IL-6 receptor monoclonal antibody, in comparison to standard care (defined as control, placebo or normal background therapy), beneficial in the treatment for COVID-19?

**Setting:** Hospitalised patients

### **Bibliography:**

1. Abani, O., Abbas, A., Abbas, F., Abbas, M., Abbasi, S., Abbass, H., ... Zuriaga-Alvaro, A. (2021). "Tocilizumab in patients admitted to hospital with COVID-19 (RECOVERY): a randomised, controlled, open-label, platform trial." *The Lancet*, 397(10285), 1637–1645. [https://doi.org/10.1016/S0140-6736\(21\)00676-0](https://doi.org/10.1016/S0140-6736(21)00676-0)
2. The REMAP-CAP Investigators\* (2021) "Interleukin-6 Receptor Antagonists in Critically Ill Patients with Covid-19." *N Engl J Med* 2021;384:1491-502.
3. Hermine, O., Mariette, X., Tharaux, P. L., Resche-Rigon, M., Porcher, R., & Ravaud, P. (2021). "Effect of Tocilizumab vs Usual Care in Adults Hospitalised with COVID-19 and Moderate or Severe Pneumonia: A Randomised Clinical Trial." *JAMA Internal Medicine*, 181(1), 32–40. <https://doi.org/10.1001/jamainternmed.2020.6820>
4. Lescure, F. X., Honda, H., Fowler, R. A., Lazar, J. S., Shi, G., Wung, P., ... Vizcarra, P. (2021). "Sarilumab in patients admitted to hospital with severe or critical COVID-19: a randomised, double-blind, placebo-controlled, phase 3 trial." *The Lancet Respiratory Medicine*, 9(5), 522–532. [https://doi.org/10.1016/S2213-2600\(21\)00099-0](https://doi.org/10.1016/S2213-2600(21)00099-0)
5. Rosas, I. O., Bräu, N., Waters, M., Go, R. C., Hunter, B. D., Bhagani, S., ... Malhotra, A. (2021). "Tocilizumab in Hospitalised Patients with Severe Covid-19 Pneumonia." *New England Journal of Medicine*, 384(16), 1503–1516. <https://doi.org/10.1056/nejmoa2028700>
6. Salama, C., Han, J., Yau, L., Reiss, W. G., Kramer, B., Neidhart, J. D., ... Mohan, S. V. (2021). "Tocilizumab in Patients Hospitalised with Covid-19 Pneumonia." *New England Journal of Medicine*, 384(1), 20–30. <https://doi.org/10.1056/nejmoa2030340>
7. Salvarani, C., Dolci, G., Massari, M., Merlo, D. F., Cavuto, S., Savoldi, L., ... Costantini, M. (2021). "Effect of Tocilizumab vs Standard Care on Clinical Worsening in Patients Hospitalised with COVID-19 Pneumonia: A Randomised Clinical Trial." *JAMA Internal Medicine*, 181(1), 24–31. <https://doi.org/10.1001/jamainternmed.2020.6615>
8. Sivapalasingam, S., Lederer, D., Bhore, R., Hajizadeh, N., Criner, G., Hosain, R., ... Weinreich, D. (2021). "A Randomised Placebo-Controlled Trial of Sarilumab in Hospitalised Patients with Covid-19." *MedRxiv*, 2021.05.13.21256973. Retrieved from <http://medrxiv.org/content/early/2021/06/19/2021.05.13.21256973.abstract>
9. Soin, A. S., Kumar, K., Choudhary, N. S., Sharma, P., Mehta, Y., Kataria, S., ... Ramanan, A. V. (2021). "Tocilizumab plus standard care versus standard care in patients in India with moderate to severe COVID-19-associated cytokine release syndrome (COVINTOC): an open-label, multicentre, randomised, controlled, phase 3 trial." *The Lancet Respiratory Medicine*, 9(5), 511–521. [https://doi.org/10.1016/S2213-2600\(21\)00081-3](https://doi.org/10.1016/S2213-2600(21)00081-3)
10. Stone, J. H., Frigault, M. J., Serling-Boyd, N. J., Fernandes, A. D., Harvey, L., Foulkes, A. S., ... Mansour, M. K. (2020). "Efficacy of Tocilizumab in Patients Hospitalised with Covid-19." *New England Journal of Medicine*, 383(24), 2333–2344. <https://doi.org/10.1056/nejmoa2028836>
11. Veiga, V. C., Prats, J. A. G. G., Farias, D. L. C., Rosa, R. G., Dourado, L. K., Zampieri, F. G., ... Scheinberg, P. (2021). "Effect of tocilizumab on clinical outcomes at 15 days in patients with severe or critical coronavirus disease 2019: Randomised controlled trial." *The BMJ*, 372. <https://doi.org/10.1136/bmj.n84> DOI: 10.1056/NEJMoa2100433
12. Dongsheng Wang, Binqing Fu, Zhen Peng, Dongliang Yang, Mingfeng Han, ... Xiaoling Xu. (2021) "Tocilizumab in patients with moderate or severe COVID-19: a randomized, controlled, open-label, multicenter trial." *Front. Med.* <https://doi.org/10.1007/s11684-020-0824-3>

| Certainty assessment |              |              |               |              |             |                      | № of patients             |                                                                          | Effect            |                   | Certainty | Importance |
|----------------------|--------------|--------------|---------------|--------------|-------------|----------------------|---------------------------|--------------------------------------------------------------------------|-------------------|-------------------|-----------|------------|
| № of studies         | Study design | Risk of bias | Inconsistency | Indirectness | Imprecision | Other considerations | IL-6 receptor antagonists | standard care (defined as control, placebo or normal background therapy) | Relative (95% CI) | Absolute (95% CI) |           |            |

#### Adverse events

|   |                   |             |             |             |                      |      |                  |                 |                        |                                                      |                  |          |
|---|-------------------|-------------|-------------|-------------|----------------------|------|------------------|-----------------|------------------------|------------------------------------------------------|------------------|----------|
| 9 | randomised trials | not serious | not serious | not serious | serious <sup>a</sup> | none | 856/1559 (54.9%) | 363/755 (48.1%) | OR 1.25 (0.90 to 1.75) | <b>56 more per 1,000</b> (from 26 fewer to 138 more) | ⊕⊕⊕○<br>Moderate | CRITICAL |
|---|-------------------|-------------|-------------|-------------|----------------------|------|------------------|-----------------|------------------------|------------------------------------------------------|------------------|----------|

#### Serious adverse events

|    |                   |             |             |             |                      |      |                  |                  |                        |                                                      |                  |          |
|----|-------------------|-------------|-------------|-------------|----------------------|------|------------------|------------------|------------------------|------------------------------------------------------|------------------|----------|
| 11 | randomised trials | not serious | not serious | not serious | serious <sup>a</sup> | none | 492/2121 (23.2%) | 227/1238 (18.3%) | OR 0.91 (0.73 to 1.12) | <b>14 fewer per 1,000</b> (from 43 fewer to 18 more) | ⊕⊕⊕○<br>Moderate | CRITICAL |
|----|-------------------|-------------|-------------|-------------|----------------------|------|------------------|------------------|------------------------|------------------------------------------------------|------------------|----------|

#### Mortality

|    |                   |             |             |             |                      |      |                   |                   |                        |                                                     |                  |          |
|----|-------------------|-------------|-------------|-------------|----------------------|------|-------------------|-------------------|------------------------|-----------------------------------------------------|------------------|----------|
| 12 | randomised trials | not serious | not serious | not serious | serious <sup>a</sup> | none | 1310/5188 (25.3%) | 1068/3615 (29.5%) | OR 0.89 (0.78 to 1.01) | <b>24 fewer per 1,000</b> (from 49 fewer to 2 more) | ⊕⊕⊕○<br>Moderate | CRITICAL |
|----|-------------------|-------------|-------------|-------------|----------------------|------|-------------------|-------------------|------------------------|-----------------------------------------------------|------------------|----------|

#### time to hospital discharge

|   |                   |             |             |             |             |      |  |  |                        |                                                    |              |           |
|---|-------------------|-------------|-------------|-------------|-------------|------|--|--|------------------------|----------------------------------------------------|--------------|-----------|
| 5 | randomised trials | not serious | not serious | not serious | not serious | none |  |  | HR 1.31 (1.15 to 1.48) | <b>1 fewer per 1,000</b> (from 1 fewer to 1 fewer) | ⊕⊕⊕⊕<br>High | IMPORTANT |
|---|-------------------|-------------|-------------|-------------|-------------|------|--|--|------------------------|----------------------------------------------------|--------------|-----------|

#### ICU admission

|   |                   |             |                      |             |                      |      |                 |                 |                        |                                                       |                  |          |
|---|-------------------|-------------|----------------------|-------------|----------------------|------|-----------------|-----------------|------------------------|-------------------------------------------------------|------------------|----------|
| 4 | randomised trials | not serious | serious <sup>b</sup> | not serious | serious <sup>a</sup> | none | 115/338 (34.0%) | 114/279 (40.9%) | OR 0.74 (0.40 to 1.37) | <b>70 fewer per 1,000</b> (from 192 fewer to 78 more) | ⊕⊕⊕○<br>○<br>Low | CRITICAL |
|---|-------------------|-------------|----------------------|-------------|----------------------|------|-----------------|-----------------|------------------------|-------------------------------------------------------|------------------|----------|

#### Deterioration (time to clinical failure defined as death, mechanical ventilation or transfer to ICU)

|   |                   |             |             |             |                      |      |                |                |                        |                                                       |                  |          |
|---|-------------------|-------------|-------------|-------------|----------------------|------|----------------|----------------|------------------------|-------------------------------------------------------|------------------|----------|
| 2 | randomised trials | not serious | not serious | not serious | serious <sup>a</sup> | none | 70/243 (28.8%) | 55/153 (35.9%) | OR 0.68 (0.44 to 1.06) | <b>83 fewer per 1,000</b> (from 161 fewer to 14 more) | ⊕⊕⊕○<br>Moderate | CRITICAL |
|---|-------------------|-------------|-------------|-------------|----------------------|------|----------------|----------------|------------------------|-------------------------------------------------------|------------------|----------|

#### Mechanical ventilation

|   |                   |             |             |             |             |      |                  |                  |                        |                                                       |              |           |
|---|-------------------|-------------|-------------|-------------|-------------|------|------------------|------------------|------------------------|-------------------------------------------------------|--------------|-----------|
| 7 | randomised trials | not serious | not serious | not serious | not serious | none | 370/2561 (14.4%) | 426/2317 (18.4%) | OR 0.75 (0.64 to 0.87) | <b>39 fewer per 1,000</b> (from 58 fewer to 20 fewer) | ⊕⊕⊕⊕<br>High | IMPORTANT |
|---|-------------------|-------------|-------------|-------------|-------------|------|------------------|------------------|------------------------|-------------------------------------------------------|--------------|-----------|

#### Time to improvement on ordinal scale

| Certainty assessment |                   |              |               |              |             |                      | Nº of patients            |                                                                          | Effect                 |                                                    | Certainty    | Importance |
|----------------------|-------------------|--------------|---------------|--------------|-------------|----------------------|---------------------------|--------------------------------------------------------------------------|------------------------|----------------------------------------------------|--------------|------------|
| Nº of studies        | Study design      | Risk of bias | Inconsistency | Indirectness | Imprecision | Other considerations | IL-6 receptor antagonists | standard care (defined as control, placebo or normal background therapy) | Relative (95% CI)      | Absolute (95% CI)                                  |              |            |
| 4                    | randomised trials | not serious  | not serious   | not serious  | not serious | none                 |                           |                                                                          | HR 1.15 (1.01 to 1.32) | <b>1 fewer per 1,000</b> (from 1 fewer to 1 fewer) | ⊕⊕⊕⊕<br>High | CRITICAL   |

#### Mechanical ventilation OR death

|   |                   |             |             |             |             |      |                  |                  |                        |                                                       |              |          |
|---|-------------------|-------------|-------------|-------------|-------------|------|------------------|------------------|------------------------|-------------------------------------------------------|--------------|----------|
| 5 | randomised trials | not serious | not serious | not serious | not serious | none | 695/2292 (30.3%) | 820/2140 (38.3%) | OR 0.76 (0.65 to 0.88) | <b>62 fewer per 1,000</b> (from 96 fewer to 30 fewer) | ⊕⊕⊕⊕<br>High | CRITICAL |
|---|-------------------|-------------|-------------|-------------|-------------|------|------------------|------------------|------------------------|-------------------------------------------------------|--------------|----------|

#### Clinical Worsening on OS scale

|   |                   |             |             |             |                      |      |               |               |                        |                                                     |                  |           |
|---|-------------------|-------------|-------------|-------------|----------------------|------|---------------|---------------|------------------------|-----------------------------------------------------|------------------|-----------|
| 2 | randomised trials | not serious | not serious | not serious | serious <sup>a</sup> | none | 39/411 (9.5%) | 20/208 (9.6%) | OR 0.97 (0.54 to 1.75) | <b>3 fewer per 1,000</b> (from 42 fewer to 61 more) | ⊕⊕⊕○<br>Moderate | IMPORTANT |
|---|-------------------|-------------|-------------|-------------|----------------------|------|---------------|---------------|------------------------|-----------------------------------------------------|------------------|-----------|

#### Clinical Improvement on OS scale

|   |                   |             |             |             |                      |      |                 |                 |                        |                                                      |                  |           |
|---|-------------------|-------------|-------------|-------------|----------------------|------|-----------------|-----------------|------------------------|------------------------------------------------------|------------------|-----------|
| 2 | randomised trials | not serious | not serious | not serious | serious <sup>a</sup> | none | 361/528 (68.4%) | 120/171 (70.2%) | OR 1.24 (0.82 to 1.87) | <b>43 more per 1,000</b> (from 43 fewer to 113 more) | ⊕⊕⊕○<br>Moderate | IMPORTANT |
|---|-------------------|-------------|-------------|-------------|----------------------|------|-----------------|-----------------|------------------------|------------------------------------------------------|------------------|-----------|

#### Proportion discharged from hospital

|   |                   |             |             |             |             |      |                   |                   |                        |                                                    |              |          |
|---|-------------------|-------------|-------------|-------------|-------------|------|-------------------|-------------------|------------------------|----------------------------------------------------|--------------|----------|
| 5 | randomised trials | not serious | not serious | not serious | not serious | none | 1666/2638 (63.2%) | 1296/2389 (54.2%) | OR 1.29 (1.15 to 1.46) | <b>62 more per 1,000</b> (from 34 more to 91 more) | ⊕⊕⊕⊕<br>High | CRITICAL |
|---|-------------------|-------------|-------------|-------------|-------------|------|-------------------|-------------------|------------------------|----------------------------------------------------|--------------|----------|

#### ICU length of stay

|   |                   |             |             |             |                      |      |    |    |   |                                          |                  |           |
|---|-------------------|-------------|-------------|-------------|----------------------|------|----|----|---|------------------------------------------|------------------|-----------|
| 1 | randomised trials | not serious | not serious | not serious | serious <sup>a</sup> | none | 91 | 88 | - | MD 0.2 lower (2.06 lower to 1.66 higher) | ⊕⊕⊕○<br>Moderate | IMPORTANT |
|---|-------------------|-------------|-------------|-------------|----------------------|------|----|----|---|------------------------------------------|------------------|-----------|

#### Non-invasive ventilation

|   |                   |             |             |             |                      |      |                 |                  |                        |                                                     |                  |           |
|---|-------------------|-------------|-------------|-------------|----------------------|------|-----------------|------------------|------------------------|-----------------------------------------------------|------------------|-----------|
| 2 | randomised trials | not serious | not serious | not serious | serious <sup>a</sup> | none | 289/998 (29.0%) | 322/1000 (32.2%) | OR 0.85 (0.71 to 1.04) | <b>34 fewer per 1,000</b> (from 70 fewer to 9 more) | ⊕⊕⊕○<br>Moderate | IMPORTANT |
|---|-------------------|-------------|-------------|-------------|----------------------|------|-----------------|------------------|------------------------|-----------------------------------------------------|------------------|-----------|

#### Progression to MV, ECMO or death

| Certainty assessment |                   |              |               |              |             |                      | № of patients             |                                                                          | Effect                 |                                                         | Certainty    | Importance |
|----------------------|-------------------|--------------|---------------|--------------|-------------|----------------------|---------------------------|--------------------------------------------------------------------------|------------------------|---------------------------------------------------------|--------------|------------|
| № of studies         | Study design      | Risk of bias | Inconsistency | Indirectness | Imprecision | Other considerations | IL-6 receptor antagonists | standard care (defined as control, placebo or normal background therapy) | Relative (95% CI)      | Absolute (95% CI)                                       |              |            |
| 1                    | randomised trials | not serious  | not serious   | not serious  | not serious | none                 | 113/279 (40.5%)           | 144/273 (52.7%)                                                          | OR 0.61 (0.44 to 0.85) | <b>122 fewer per 1,000</b> (from 198 fewer to 41 fewer) | ⊕⊕⊕⊕<br>High | CRITICAL   |

time to ICU discharge

|   |                   |             |             |             |             |      |  |  |                        |                                                    |              |          |
|---|-------------------|-------------|-------------|-------------|-------------|------|--|--|------------------------|----------------------------------------------------|--------------|----------|
| 2 | randomised trials | not serious | not serious | not serious | not serious | none |  |  | HR 1.48 (1.26 to 1.73) | <b>1 fewer per 1,000</b> (from 2 fewer to 1 fewer) | ⊕⊕⊕⊕<br>High | CRITICAL |
|---|-------------------|-------------|-------------|-------------|-------------|------|--|--|------------------------|----------------------------------------------------|--------------|----------|

CI: confidence interval; HR: hazard Ratio; MD: mean difference; OR: odds ratio

### Explanations

a. CI shows both beneficial and detrimental effects

b. Heterogeneity between studies

N.B. Mortality, Time to clinical improvement (on an ordinal scale), Clinical improvement on WHO ordinal scale, Clinical worsening, Deterioration (time to clinical failure defined as death, mechanical ventilation or transfer to ICU), Need for mechanical ventilation, Mechanical ventilation OR death, Need for ICU admission; Discharge from hospital (days), Proportion discharged from hospital, Adverse events and Serious adverse events were the measurable endpoints found for anti-IL-6 or IL-6 receptor.

Additional endpoints not included in the evidence table which were searched for but were either not studied or data was not found in an extractable format were; Clinical resolution or cure (also includes the reverse i.e patients not cured); Requirement for oxygen; Hospital admission; Hospital length of stay; Need for non-invasive ventilation; Ordinal scale or clinical status at day 28; ICU length of stay; DLCO and HRCT at 28 days and 3 months (and 6months); Severity of symptoms; Improvement in oxygen saturations or arterial blood gases; Relapse; Duration of fever; Viral load and Viral clearance.

**PICO Question 3:** Is Hydroxychloroquine, in comparison to standard care (defined as control, placebo or normal background therapy), beneficial in the treatment for COVID-19?

**Setting:** Hospitalised patients or outpatients

**Bibliography:**

1. Hydroxychloroquine with or without Azithromycin in Mild-to-Moderate COVID-19. Cavalcanti AB, *et al.* N Engl J Med. 2020 Jul 23;NEJMoa2019014. doi: 10.1056/NEJMoa2019014. Online ahead of print.
2. Hydroxychloroquine in patients with mainly mild to moderate coronavirus disease 2019: open label, randomised controlled trial. Tang W, *et al.* BMJ. 2020 May 14;369:m1849. doi: 10.1136/bmj.m1849
3. Hydroxychloroquine in Nonhospitalised Adults With Early COVID-19 : A Randomised Trial. Skipper CP, *et al.* Ann Intern Med. 2020 Jul 16:M20-4207. doi: 10.7326/M20-4207. Online ahead of print.
4. Effect of Hydroxychloroquine in Hospitalised Patients with COVID-19. RECOVERY Collaborative Group, Horby P, *et al.* N Engl J Med. 2020 Oct 8. doi: 10.1056/NEJMoa2022926. Online ahead of print.
5. Hydroxychloroquine in the Treatment of COVID-19: A Multicenter Randomised Controlled Study. Abd-El salam S, *et al.* Am J Trop Med Hyg. 2020 Aug 14. doi: 10.4269/ajtmh.20-0873. Online ahead of print.
6. [A pilot study of hydroxychloroquine in treatment of patients with moderate COVID-19]. Chen J, *et al.* Zhejiang Da Xue Xue Bao Yi Xue Ban. 2020 May 25;49(2):215-219. doi: 10.3785/j.issn.1008-9292.2020.03.03.
7. Efficacy and safety of chloroquine or hydroxychloroquine in moderate type of COVID-19: a prospective open-label randomised controlled study. Chen L, *et al.* medRxiv 2020.06.19.20136093; doi: <https://doi.org/10.1101/2020.06.19.20136093>
8. Efficacy of hydroxychloroquine in patients with COVID-19: results of a randomised clinical trial. Chen Z, *et al.* medRxiv 2020.03.22.20040758; doi: <https://doi.org/10.1101/2020.03.22.20040758>.
9. A Multicenter, randomised, open-label, controlled trial to evaluate the efficacy and tolerability of hydroxychloroquine and a retrospective study in adult patients with mild to moderate Coronavirus disease 2019 (COVID-19) Chen CP, *et al.* medRxiv 2020.07.08.20148841; doi: <https://doi.org/10.1101/2020.07.08.20148841>
10. Hydroxychloroquine for Early Treatment of Adults with Mild COVID-19: A Randomised-Controlled Trial. Mitjà O, *et al.* Clin Infect Dis. 2020 Jul 16;ciaa1009. doi: 10.1093/cid/ciaa1009. Online ahead of print.
11. Repurposed antiviral drugs for COVID-19 –interim WHO SOLIDARITY trial results. WHO Solidarity trial consortium. Pan H, *et al.* medRxiv preprint doi: <https://doi.org/10.1101/2020.10.15.20209817>

| Certainty assessment |              |              |               |              |             |                      | No of patients     |                                                                                                    | Effect            |                   | Certainty | Importance |
|----------------------|--------------|--------------|---------------|--------------|-------------|----------------------|--------------------|----------------------------------------------------------------------------------------------------|-------------------|-------------------|-----------|------------|
| No of studies        | Study design | Risk of bias | Inconsistency | Indirectness | Imprecision | Other considerations | hydroxychloroquine | standard care (defined as no treatment, placebo or background therapy according to local practice) | Relative (95% CI) | Absolute (95% CI) |           |            |

Time to clinical improvement (days)

|   |                   |             |             |             |                      |      |     |     |                     |                              |               |          |
|---|-------------------|-------------|-------------|-------------|----------------------|------|-----|-----|---------------------|------------------------------|---------------|----------|
| 1 | randomised trials | not serious | not serious | not serious | serious <sup>a</sup> | none | -/0 | -/0 | 1.01 (0.59 to 1.74) | -- per 1,000 (from -- to --) | ⊕⊕⊕○ MODERATE | CRITICAL |
|---|-------------------|-------------|-------------|-------------|----------------------|------|-----|-----|---------------------|------------------------------|---------------|----------|

Clinical Resolution

|   |                   |             |             |                      |             |      |                 |                 |                        |                                              |               |          |
|---|-------------------|-------------|-------------|----------------------|-------------|------|-----------------|-----------------|------------------------|----------------------------------------------|---------------|----------|
| 3 | randomised trials | not serious | not serious | serious <sup>b</sup> | not serious | none | 176/227 (77.5%) | 201/249 (80.7%) | RR 0.99 (0.91 to 1.07) | 8 fewer per 1,000 (from 73 fewer to 57 more) | ⊕⊕⊕○ MODERATE | CRITICAL |
|---|-------------------|-------------|-------------|----------------------|-------------|------|-----------------|-----------------|------------------------|----------------------------------------------|---------------|----------|

Deterioration



| Certainty assessment |                   |                      |                      |              |                      |                      | No of patients     |                                                                                                    | Effect                 |                                               | Certainty             | Importance |
|----------------------|-------------------|----------------------|----------------------|--------------|----------------------|----------------------|--------------------|----------------------------------------------------------------------------------------------------|------------------------|-----------------------------------------------|-----------------------|------------|
| No of studies        | Study design      | Risk of bias         | Inconsistency        | Indirectness | Imprecision          | Other considerations | hydroxychloroquine | standard care (defined as no treatment, placebo or background therapy according to local practice) | Relative (95% CI)      | Absolute (95% CI)                             |                       |            |
| 3                    | randomised trials | serious <sup>c</sup> | serious <sup>c</sup> | not serious  | serious <sup>a</sup> | none                 | 2/116 (1.7%)       | 4/126 (3.2%)                                                                                       | OR 0.65 (0.17 to 2.50) | 11 fewer per 1,000 (from 26 fewer to 44 more) | ⊕○○○<br>○<br>VERY LOW | IMPORTANT  |

#### Hospitalisation

|   |                   |             |             |             |                      |      |               |               |                        |                                               |                  |          |
|---|-------------------|-------------|-------------|-------------|----------------------|------|---------------|---------------|------------------------|-----------------------------------------------|------------------|----------|
| 2 | randomised trials | not serious | not serious | not serious | serious <sup>a</sup> | none | 12/348 (3.4%) | 21/368 (5.7%) | RR 0.62 (0.31 to 1.24) | 22 fewer per 1,000 (from 39 fewer to 14 more) | ⊕⊕⊕○<br>MODERATE | CRITICAL |
|---|-------------------|-------------|-------------|-------------|----------------------|------|---------------|---------------|------------------------|-----------------------------------------------|------------------|----------|

#### Non-invasive ventilation

|   |                   |             |             |             |                      |      |                |               |                        |                                               |                  |          |
|---|-------------------|-------------|-------------|-------------|----------------------|------|----------------|---------------|------------------------|-----------------------------------------------|------------------|----------|
| 1 | randomised trials | not serious | not serious | not serious | serious <sup>a</sup> | none | 17/159 (10.7%) | 16/173 (9.2%) | OR 1.17 (0.57 to 2.41) | 14 more per 1,000 (from 38 fewer to 105 more) | ⊕⊕⊕○<br>MODERATE | CRITICAL |
|---|-------------------|-------------|-------------|-------------|----------------------|------|----------------|---------------|------------------------|-----------------------------------------------|------------------|----------|

#### Viral load

|   |                   |             |             |                      |             |      |     |     |   |                                          |                  |           |
|---|-------------------|-------------|-------------|----------------------|-------------|------|-----|-----|---|------------------------------------------|------------------|-----------|
| 1 | randomised trials | not serious | not serious | serious <sup>b</sup> | not serious | none | 136 | 157 | - | MD 0.07 lower (0.11 lower to 0.03 lower) | ⊕⊕⊕○<br>MODERATE | IMPORTANT |
|---|-------------------|-------------|-------------|----------------------|-------------|------|-----|-----|---|------------------------------------------|------------------|-----------|

#### Adverse Events

|   |                   |                      |                      |             |             |      |                 |                 |                        |                                                |                  |          |
|---|-------------------|----------------------|----------------------|-------------|-------------|------|-----------------|-----------------|------------------------|------------------------------------------------|------------------|----------|
| 7 | randomised trials | serious <sup>d</sup> | serious <sup>d</sup> | not serious | not serious | none | 316/714 (44.3%) | 109/710 (15.4%) | OR 4.23 (3.30 to 5.42) | 281 more per 1,000 (from 221 more to 342 more) | ⊕⊕○○<br>○<br>LOW | CRITICAL |
|---|-------------------|----------------------|----------------------|-------------|-------------|------|-----------------|-----------------|------------------------|------------------------------------------------|------------------|----------|

#### Mortality - all patients

|   |                   |                      |             |             |             |      |                  |                  |                        |                                             |                  |          |
|---|-------------------|----------------------|-------------|-------------|-------------|------|------------------|------------------|------------------------|---------------------------------------------|------------------|----------|
| 9 | randomised trials | serious <sup>e</sup> | not serious | not serious | not serious | none | 536/3226 (16.6%) | 894/4798 (18.6%) | RR 1.08 (0.97 to 1.19) | 15 more per 1,000 (from 6 fewer to 35 more) | ⊕⊕⊕○<br>MODERATE | CRITICAL |
|---|-------------------|----------------------|-------------|-------------|-------------|------|------------------|------------------|------------------------|---------------------------------------------|------------------|----------|

#### Invasive ventilation

| Certainty assessment |                   |              |               |              |                      |                      | No of patients     |                                                                                                    | Effect                           |                                                      | Certainty        | Importance |
|----------------------|-------------------|--------------|---------------|--------------|----------------------|----------------------|--------------------|----------------------------------------------------------------------------------------------------|----------------------------------|------------------------------------------------------|------------------|------------|
| No of studies        | Study design      | Risk of bias | Inconsistency | Indirectness | Imprecision          | Other considerations | hydroxychloroquine | standard care (defined as no treatment, placebo or background therapy according to local practice) | Relative (95% CI)                | Absolute (95% CI)                                    |                  |            |
| 4                    | randomised trials | not serious  | not serious   | not serious  | serious <sup>f</sup> | none                 | 134/1692 (7.9%)    | 232/3050 (7.6%)                                                                                    | <b>OR 1.11</b><br>(0.88 to 1.38) | <b>8 more per 1,000</b><br>(from 9 fewer to 26 more) | ⊕⊕⊕○<br>MODERATE | CRITICAL   |

#### ICU admission

|   |                   |             |             |             |                      |      |               |               |                                  |                                                         |                  |          |
|---|-------------------|-------------|-------------|-------------|----------------------|------|---------------|---------------|----------------------------------|---------------------------------------------------------|------------------|----------|
| 1 | randomised trials | not serious | not serious | not serious | serious <sup>g</sup> | none | 11/97 (11.3%) | 13/97 (13.4%) | <b>OR 0.83</b><br>(0.35 to 1.95) | <b>20 fewer per 1,000</b><br>(from 83 fewer to 98 more) | ⊕⊕⊕○<br>MODERATE | CRITICAL |
|---|-------------------|-------------|-------------|-------------|----------------------|------|---------------|---------------|----------------------------------|---------------------------------------------------------|------------------|----------|

CI: Confidence interval; RR: Risk ratio; OR: Odds ratio; MD: Mean difference

#### Explanations

- Cannot exclude a large beneficial or large deleterious effect of treatment
- Mild COVID-19 disease only included in the dominant study (Mitja et al) therefore data may not be fully applicable to patients with more severe disease
- One trial with a small sample size suggests a large effect and is inconsistent with the effect seen in the other 2 trials.
- Inconsistent reporting of AEs across different studies. Studies used different doses of HCQ. Overall confidence in individual study reports is low. In addition, may get increased AE reporting in unblinded studies.
- Includes data from a preprint which has not been peer reviewed
- Confidence interval cross 1
- small sample size, more data needed

N.B. Time to clinical improvement, Clinical resolution, Mortality, Deterioration, Hospitalisations, Invasive ventilation, Non-invasive ventilation, Viral load, ICU admission and adverse events were the only measurable endpoints found for hydroxychloroquine.

Additional endpoints not included in the evidence table which were searched for but were either not studied or data was not found in an extractable format were: Requirement for oxygen; Ordinal scale or clinical status at day 28; ICU length of stay; DLCO and HRCT at 28 days and 3 months (and 6months); Hospital length of stay; Severity of symptoms; Improvement in oxygen saturations or arterial blood gases; Relapse; Viral clearance (negative SARS-CoV-2 test) and Duration of fever.

**PICO Question 4:** Is azithromycin, in comparison to standard care (defined as control, placebo or normal background therapy), beneficial in the treatment for COVID-19?

**Setting:** Hospitalised patients

**Bibliography:**

1. Abaleke, E., Abbas, M., Abbasi, S., Abbott, A., Abdelaziz, A., Abdelbadiee, S., ... Zuriaga-Alvaro, A. (2021). "Azithromycin in patients admitted to hospital with COVID-19(RECOVERY): a randomised, controlled, open-label, platform trial." *The Lancet*, 397(10274), 605–612. [https://doi.org/10.1016/S0140-6736\(21\)00149-5](https://doi.org/10.1016/S0140-6736(21)00149-5)
2. Cavalcanti, A. B., Zampieri, F. G., Rosa, R. G., Azevedo, L. C. P., Veiga, V. C., Avezum, A., ... Berwanger, O. (2020). "Hydroxychloroquine with or without Azithromycin in Mild-to-Moderate Covid-19." *New England Journal of Medicine*, 383(21), 2041–2052. <https://doi.org/10.1056/nejmoa2019014>
3. Furtado, R. H. M., Berwanger, O., Fonseca, H. A., Corrêa, T. D., Ferraz, L. R., Lapa, M. G., ... Cavalcanti, A. B. (2020). "Azithromycin in addition to standard of care versus standard of care alone in the treatment of patients admitted to the hospital with severe COVID-19 in Brazil (COALITION II): a randomised clinical trial." *The Lancet*, 396(10256), 959–967. [https://doi.org/10.1016/S0140-6736\(20\)31862-6](https://doi.org/10.1016/S0140-6736(20)31862-6)
4. Hinks, T. S., Cureton, L., Knight, R., Wang, A., Cane, J. L., Barber, V. S., ... Richards, D. (2021). "A Randomised Clinical Trial of Azithromycin Versus Standard Care in Ambulatory COVID-19 – The ATOMIC2 Trial." *SSRN Electronic Journal*, 1–22. <https://doi.org/10.2139/ssrn.3827019>
5. Sekhavati, E., Jafari, F., SeyedAlinaghi, S. A., Jamalimoghaddamsiahkali, S., Sadr, S., Tabarestani, M., ... Ghiasvand, F. (2020). "Safety and effectiveness of azithromycin in patients with COVID-19: An open-label randomised trial." *International Journal of Antimicrobial Agents*, 56(4). <https://doi.org/10.1016/j.ijantimicag.2020.106143>

| Certainty assessment |              |              |               |              |             |                      | No of patients |                                                                          | Effect            |                   | Certainty | Importance |
|----------------------|--------------|--------------|---------------|--------------|-------------|----------------------|----------------|--------------------------------------------------------------------------|-------------------|-------------------|-----------|------------|
| No of studies        | Study design | Risk of bias | Inconsistency | Indirectness | Imprecision | Other considerations | azithromycin   | standard care (defined as control, placebo or normal background therapy) | Relative (95% CI) | Absolute (95% CI) |           |            |

**Mortality**

|   |                   |             |             |             |                      |      |                  |                   |                        |                                              |                      |          |
|---|-------------------|-------------|-------------|-------------|----------------------|------|------------------|-------------------|------------------------|----------------------------------------------|----------------------|----------|
| 5 | randomised trials | not serious | not serious | not serious | serious <sup>a</sup> | none | 657/3169 (20.7%) | 1250/5898 (21.2%) | OR 0.97 (0.87 to 1.08) | 5 fewer per 1,000 (from 22 fewer to 13 more) | ⊕⊕⊕<br>○<br>Moderate | CRITICAL |
|---|-------------------|-------------|-------------|-------------|----------------------|------|------------------|-------------------|------------------------|----------------------------------------------|----------------------|----------|

**Score on ordinal scale at day 15**

|   |                   |             |             |             |                      |      |     |     |                        |                                             |                      |          |
|---|-------------------|-------------|-------------|-------------|----------------------|------|-----|-----|------------------------|---------------------------------------------|----------------------|----------|
| 3 | randomised trials | not serious | not serious | not serious | serious <sup>a</sup> | none | -/0 | -/0 | OR 1.13 (0.87 to 1.46) | 1 fewer per 1,000 (from 1 fewer to 1 fewer) | ⊕⊕⊕<br>○<br>Moderate | CRITICAL |
|---|-------------------|-------------|-------------|-------------|----------------------|------|-----|-----|------------------------|---------------------------------------------|----------------------|----------|

**Required ICU admission (deterioration)**

|   |                   |             |             |             |                      |      |             |              |                        |                                                |                      |          |
|---|-------------------|-------------|-------------|-------------|----------------------|------|-------------|--------------|------------------------|------------------------------------------------|----------------------|----------|
| 1 | randomised trials | not serious | not serious | not serious | serious <sup>b</sup> | none | 2/56 (3.6%) | 7/55 (12.7%) | OR 0.25 (0.05 to 1.28) | 92 fewer per 1,000 (from 120 fewer to 30 more) | ⊕⊕⊕<br>○<br>Moderate | CRITICAL |
|---|-------------------|-------------|-------------|-------------|----------------------|------|-------------|--------------|------------------------|------------------------------------------------|----------------------|----------|

**Hospital length of stay**

| Certainty assessment |                   |              |               |              |                      |                      | Nº of patients |                                                                          | Effect            |                                           | Certainty            | Importance |
|----------------------|-------------------|--------------|---------------|--------------|----------------------|----------------------|----------------|--------------------------------------------------------------------------|-------------------|-------------------------------------------|----------------------|------------|
| Nº of studies        | Study design      | Risk of bias | Inconsistency | Indirectness | Imprecision          | Other considerations | azithromycin   | standard care (defined as control, placebo or normal background therapy) | Relative (95% CI) | Absolute (95% CI)                         |                      |            |
| 2                    | randomised trials | not serious  | not serious   | not serious  | serious <sup>a</sup> | none                 | 228            | 214                                                                      | -                 | MD 0.37 lower (2.47 lower to 1.72 higher) | ⊕⊕⊕<br>○<br>Moderate | IMPORTANT  |

#### Serious adverse events

|   |                   |             |             |             |                      |      |                 |                |                        |                                              |                      |          |
|---|-------------------|-------------|-------------|-------------|----------------------|------|-----------------|----------------|------------------------|----------------------------------------------|----------------------|----------|
| 3 | randomised trials | not serious | not serious | not serious | serious <sup>b</sup> | none | 107/625 (17.1%) | 79/721 (11.0%) | OR 1.25 (0.86 to 1.81) | 24 more per 1,000 (from 14 fewer to 73 more) | ⊕⊕⊕<br>○<br>Moderate | CRITICAL |
|---|-------------------|-------------|-------------|-------------|----------------------|------|-----------------|----------------|------------------------|----------------------------------------------|----------------------|----------|

#### Requiring Non-invasive ventilation

|   |                   |             |             |             |                      |      |                  |                  |                        |                                              |                      |           |
|---|-------------------|-------------|-------------|-------------|----------------------|------|------------------|------------------|------------------------|----------------------------------------------|----------------------|-----------|
| 2 | randomised trials | not serious | not serious | not serious | serious <sup>a</sup> | none | 215/1513 (14.2%) | 468/2852 (16.4%) | OR 0.89 (0.75 to 1.06) | 15 fewer per 1,000 (from 36 fewer to 8 more) | ⊕⊕⊕<br>○<br>Moderate | IMPORTANT |
|---|-------------------|-------------|-------------|-------------|----------------------|------|------------------|------------------|------------------------|----------------------------------------------|----------------------|-----------|

#### Requiring Invasive mechanical ventilation

|   |                   |             |             |             |                      |      |                |                 |                        |                                              |                      |          |
|---|-------------------|-------------|-------------|-------------|----------------------|------|----------------|-----------------|------------------------|----------------------------------------------|----------------------|----------|
| 1 | randomised trials | not serious | not serious | not serious | serious <sup>a</sup> | none | 57/1368 (4.2%) | 115/2705 (4.3%) | OR 0.98 (0.71 to 1.35) | 1 fewer per 1,000 (from 12 fewer to 14 more) | ⊕⊕⊕<br>○<br>Moderate | CRITICAL |
|---|-------------------|-------------|-------------|-------------|----------------------|------|----------------|-----------------|------------------------|----------------------------------------------|----------------------|----------|

#### Proportion discharged from hospital at 28days

|   |                   |             |             |             |                      |      |                   |                   |                        |                                             |                      |          |
|---|-------------------|-------------|-------------|-------------|----------------------|------|-------------------|-------------------|------------------------|---------------------------------------------|----------------------|----------|
| 1 | randomised trials | not serious | not serious | not serious | serious <sup>a</sup> | none | 1788/2582 (69.2%) | 3525/5181 (68.0%) | OR 1.06 (0.96 to 1.17) | 13 more per 1,000 (from 9 fewer to 33 more) | ⊕⊕⊕<br>○<br>Moderate | CRITICAL |
|---|-------------------|-------------|-------------|-------------|----------------------|------|-------------------|-------------------|------------------------|---------------------------------------------|----------------------|----------|

CI: confidence interval; MD: mean difference; OR: odds ratio

### Explanations

a. CI shows both beneficial and detrimental effects

b. CI shows possible detrimental effect

N.B. Mortality, Hospital length of stay, Need for ICU admission, Clinical status measured by WHO score on ordinal scale at day 15; and Serious adverse events were the measurable endpoint found for azithromycin. Additional endpoints not included in the evidence table which were searched for but were either not studied or data was not found in an extractable format were; Clinical resolution or cure (also includes the reverse i.e patients not cured); Time to clinical improvement or resolution on an ordinal scale; Requirement for oxygen; Adverse events; Hospital admission; ICU length of stay; Need for non-invasive ventilation; Deterioration in those not requiring ventilation at start of treatment; DLCO and HRCT at 28 days and 3 months (and 6months); Severity of symptoms; Improvement in oxygen saturations or arterial blood gases; Relapse; Viral clearance (negative SARS-CoV-2 test) and Duration of fever.

**PICO Question 5:** Is Hydroxychloroquine and azithromycin, in comparison to standard care (defined as control, placebo or normal background therapy), beneficial in the treatment for COVID-19?

**Setting:** Hospitalised patients

**Bibliography:**

1. Hydroxychloroquine with or without Azithromycin in Mild-to-Moderate COVID-19. Cavalcanti AB, *et al.* N Engl J Med. 2020 Jul 23;NEJMoa2019014. doi: 10.1056/NEJMoa2019014. Online ahead of print.

| Certainty assessment |              |              |               |              |             |                      | No of patients                      |                                                                                               | Effect            |                   | Certainty | Importance |
|----------------------|--------------|--------------|---------------|--------------|-------------|----------------------|-------------------------------------|-----------------------------------------------------------------------------------------------|-------------------|-------------------|-----------|------------|
| No of studies        | Study design | Risk of bias | Inconsistency | Indirectness | Imprecision | Other considerations | Hydroxychloroquine and azithromycin | Standard care (defined as control, placebo or background therapy according to local practice) | Relative (95% CI) | Absolute (95% CI) |           |            |

#### Mortality

|   |                   |             |             |             |                      |      |              |              |                        |                                              |                                                                                                 |          |
|---|-------------------|-------------|-------------|-------------|----------------------|------|--------------|--------------|------------------------|----------------------------------------------|-------------------------------------------------------------------------------------------------|----------|
| 1 | randomised trials | not serious | not serious | not serious | serious <sup>a</sup> | none | 5/172 (2.9%) | 6/173 (3.5%) | OR 0.83 (0.25 to 2.78) | 6 fewer per 1,000 (from 26 fewer to 56 more) | <br>MODERATE | CRITICAL |
|---|-------------------|-------------|-------------|-------------|----------------------|------|--------------|--------------|------------------------|----------------------------------------------|-------------------------------------------------------------------------------------------------|----------|

#### Clinical Status measured on the WHO Ordinal scale at day 15

|   |                   |             |             |             |                      |      |     |     |                        |                                             |                                                                                                   |          |
|---|-------------------|-------------|-------------|-------------|----------------------|------|-----|-----|------------------------|---------------------------------------------|---------------------------------------------------------------------------------------------------|----------|
| 1 | randomised trials | not serious | not serious | not serious | serious <sup>a</sup> | none | -/0 | -/0 | OR 0.99 (0.57 to 1.73) | 1 fewer per 1,000 (from 2 fewer to 1 fewer) | <br>MODERATE | CRITICAL |
|---|-------------------|-------------|-------------|-------------|----------------------|------|-----|-----|------------------------|---------------------------------------------|---------------------------------------------------------------------------------------------------|----------|

#### Non-invasive ventilation

|   |                   |             |             |             |                      |      |               |               |                        |                                             |                                                                                                   |          |
|---|-------------------|-------------|-------------|-------------|----------------------|------|---------------|---------------|------------------------|---------------------------------------------|---------------------------------------------------------------------------------------------------|----------|
| 1 | randomised trials | not serious | not serious | not serious | serious <sup>a</sup> | none | 16/172 (9.3%) | 16/173 (9.2%) | OR 1.01 (0.49 to 2.08) | 1 more per 1,000 (from 45 fewer to 82 more) | <br>MODERATE | CRITICAL |
|---|-------------------|-------------|-------------|-------------|----------------------|------|---------------|---------------|------------------------|---------------------------------------------|---------------------------------------------------------------------------------------------------|----------|

#### Mechanical ventilation

|   |                   |             |             |             |                      |      |                |               |                        |                                               |                                                                                                   |          |
|---|-------------------|-------------|-------------|-------------|----------------------|------|----------------|---------------|------------------------|-----------------------------------------------|---------------------------------------------------------------------------------------------------|----------|
| 1 | randomised trials | not serious | not serious | not serious | serious <sup>a</sup> | none | 19/172 (11.0%) | 12/173 (6.9%) | OR 1.67 (0.78 to 3.55) | 41 more per 1,000 (from 14 fewer to 140 more) | <br>MODERATE | CRITICAL |
|---|-------------------|-------------|-------------|-------------|----------------------|------|----------------|---------------|------------------------|-----------------------------------------------|---------------------------------------------------------------------------------------------------|----------|

#### Duration of hospital stay (days)

|   |                   |             |             |             |                      |      |     |     |   |                                           |                                                                                                   |           |
|---|-------------------|-------------|-------------|-------------|----------------------|------|-----|-----|---|-------------------------------------------|---------------------------------------------------------------------------------------------------|-----------|
| 1 | randomised trials | not serious | not serious | not serious | serious <sup>a</sup> | none | 172 | 173 | - | MD 0.8 higher (0.85 lower to 2.45 higher) | <br>MODERATE | IMPORTANT |
|---|-------------------|-------------|-------------|-------------|----------------------|------|-----|-----|---|-------------------------------------------|---------------------------------------------------------------------------------------------------|-----------|

#### Adverse events

| Certainty assessment |                   |                      |               |              |             |                      | No of patients                      |                                                                                               | Effect                           |                                                         | Certainty            | Importance |
|----------------------|-------------------|----------------------|---------------|--------------|-------------|----------------------|-------------------------------------|-----------------------------------------------------------------------------------------------|----------------------------------|---------------------------------------------------------|----------------------|------------|
| No of studies        | Study design      | Risk of bias         | Inconsistency | Indirectness | Imprecision | Other considerations | Hydroxychloroquine and azithromycin | Standard care (defined as control, placebo or background therapy according to local practice) | Relative (95% CI)                | Absolute (95% CI)                                       |                      |            |
| 1                    | randomised trials | serious <sup>b</sup> | not serious   | not serious  | not serious | none                 | 94/239 (39.3%)                      | 40/177 (22.6%)                                                                                | <b>OR 2.22</b><br>(1.43 to 3.44) | <b>167 more per 1,000</b><br>(from 69 more to 275 more) | ⊕⊕⊕<br>○<br>MODERATE | CRITICAL   |

CI: Confidence interval; OR: Odds ratio; MD: Mean difference

*Explanations*

a. wide confidence interval that includes both beneficial and detrimental effect

b. Not blinded, higher propensity to report adverse events in active treatment arms

N.B. Mortality, Time to clinical improvement (measured on the WHO ordinal scale at day 15), Need for non-invasive ventilation, need for mechanical ventilation, Hospital length of stay and Adverse events were the measurable endpoint found for hydroxychloroquine and azithromycin combination treatment. Additional endpoints not included in the evidence table which were searched for but were either not studied or data was not found in an extractable format were; Need for ICU admission (incorporating mechanical ventilation/shock/ARDS); Clinical resolution or cure (also includes the reverse i.e patients not cured); Requirement for oxygen; Hospital admission; Ordinal scale or clinical status at day 28; ICU length of stay; Deterioration in those not requiring ventilation at start of treatment; DLCO and HRCT at 28 days and 3 months (and 6months); Severity of symptoms; Improvement in oxygen saturations or arterial blood gases; Relapse; Viral clearance (negative SARS-CoV-2 test) and Duration of fever.

**PICO Question 6:** Is colchicine, in comparison to standard care (defined as control, placebo or normal background therapy), beneficial in the treatment for COVID-19?

**Setting:** hospital

**Bibliography:**

1. Deftereos, S. G., Giannopoulos, G., Vrachatis, D. A., Siasos, G. D., Giotaki, S. G., Gargalianos, P., ... Stefanadis, C. (2020). "Effect of Colchicine vs Standard Care on Cardiac and Inflammatory Biomarkers and Clinical Outcomes in Patients Hospitalised with Coronavirus Disease 2019: The GRECCO-19 Randomised Clinical Trial." JAMA NetworkOpen, 3(6), 1–14. <https://doi.org/10.1001/jamanetworkopen.2020.13136>
2. Landray, M. (2021). "Colchicine in patients admitted to hospital with COVID-19 (RECOVERY): a randomised, controlled, open-label, platform trial." MedRxiv, 2021.05.18.21257267. <https://doi.org/10.1101/2021.05.18.21257267>
3. Lopes, M. I., Bonjorno, L. P., Giannini, M. C., Amaral, N. B., Menezes, P. I., Dib, S. M., ... Oliveira, R. D. R. (2021). "Beneficial effects of colchicine for moderate to severe COVID-19: A randomised, double-blinded, placebo-controlled clinical trial." RMD Open, 7(1), 1–8. <https://doi.org/10.1136/rmdopen-2020-001455>

| Certainty assessment |              |              |               |              |             |                      | No of patients |                                                                          | Effect            |                   | Certainty | Importance |
|----------------------|--------------|--------------|---------------|--------------|-------------|----------------------|----------------|--------------------------------------------------------------------------|-------------------|-------------------|-----------|------------|
| No of studies        | Study design | Risk of bias | Inconsistency | Indirectness | Imprecision | Other considerations | colchicine     | standard care (defined as control, placebo or normal background therapy) | Relative (95% CI) | Absolute (95% CI) |           |            |

Deterioration (defined as 2 points on ordinal scale)

|   |                   |             |             |             |                      |      |             |              |                        |                                                        |                                                                                                   |           |
|---|-------------------|-------------|-------------|-------------|----------------------|------|-------------|--------------|------------------------|--------------------------------------------------------|---------------------------------------------------------------------------------------------------|-----------|
| 1 | randomised trials | not serious | not serious | not serious | serious <sup>a</sup> | none | 1/55 (1.8%) | 7/50 (14.0%) | OR 0.11 (0.01 to 0.96) | <b>122 fewer per 1,000</b> (from 138 fewer to 5 fewer) | <br>Moderate | IMPORTANT |
|---|-------------------|-------------|-------------|-------------|----------------------|------|-------------|--------------|------------------------|--------------------------------------------------------|---------------------------------------------------------------------------------------------------|-----------|

Mortality

|   |                   |             |             |             |                      |      |                   |                   |                        |                                                        |                                                                                                   |          |
|---|-------------------|-------------|-------------|-------------|----------------------|------|-------------------|-------------------|------------------------|--------------------------------------------------------|---------------------------------------------------------------------------------------------------|----------|
| 3 | randomised trials | not serious | not serious | not serious | serious <sup>b</sup> | none | 1174/5701 (20.6%) | 1196/5816 (20.6%) | OR 0.64 (0.22 to 1.89) | <b>64 fewer per 1,000</b> (from 152 fewer to 123 more) | <br>Moderate | CRITICAL |
|---|-------------------|-------------|-------------|-------------|----------------------|------|-------------------|-------------------|------------------------|--------------------------------------------------------|---------------------------------------------------------------------------------------------------|----------|

ICU admission

|   |                   |             |             |             |                      |      |             |              |                        |                                                        |                                                                                                   |          |
|---|-------------------|-------------|-------------|-------------|----------------------|------|-------------|--------------|------------------------|--------------------------------------------------------|---------------------------------------------------------------------------------------------------|----------|
| 1 | randomised trials | not serious | not serious | not serious | serious <sup>b</sup> | none | 2/36 (5.6%) | 4/36 (11.1%) | OR 0.47 (0.08 to 2.75) | <b>56 fewer per 1,000</b> (from 101 fewer to 145 more) | <br>Moderate | CRITICAL |
|---|-------------------|-------------|-------------|-------------|----------------------|------|-------------|--------------|------------------------|--------------------------------------------------------|---------------------------------------------------------------------------------------------------|----------|

Adverse effect- Diarrhoea

|   |                   |             |             |             |                      |      |               |               |                        |                                                      |                                                                                                   |          |
|---|-------------------|-------------|-------------|-------------|----------------------|------|---------------|---------------|------------------------|------------------------------------------------------|---------------------------------------------------------------------------------------------------|----------|
| 2 | randomised trials | not serious | not serious | not serious | serious <sup>c</sup> | none | 31/91 (34.1%) | 11/86 (12.8%) | OR 3.70 (1.68 to 8.16) | <b>224 more per 1,000</b> (from 70 more to 417 more) | <br>Moderate | CRITICAL |
|---|-------------------|-------------|-------------|-------------|----------------------|------|---------------|---------------|------------------------|------------------------------------------------------|---------------------------------------------------------------------------------------------------|----------|

Proportion discharged from hospital at day 28

| Certainty assessment |                   |              |               |              |                      |                      | No of patients    |                                                                          | Effect                 |                                                    | Certainty            | Importance |
|----------------------|-------------------|--------------|---------------|--------------|----------------------|----------------------|-------------------|--------------------------------------------------------------------------|------------------------|----------------------------------------------------|----------------------|------------|
| No of studies        | Study design      | Risk of bias | Inconsistency | Indirectness | Imprecision          | Other considerations | colchicine        | standard care (defined as control, placebo or normal background therapy) | Relative (95% CI)      | Absolute (95% CI)                                  |                      |            |
| 1                    | randomised trials | not serious  | not serious   | not serious  | serious <sup>b</sup> | none                 | 3901/5610 (69.5%) | 4032/5730 (70.4%)                                                        | OR 0.96 (0.89 to 1.04) | <b>9 fewer per 1,000</b> (from 25 fewer to 8 more) | ⊕⊕⊕<br>○<br>Moderate | CRITICAL   |

#### Progression to non-invasive ventilation

|   |                   |             |             |             |                      |      |                  |                  |                        |                                                     |                      |           |
|---|-------------------|-------------|-------------|-------------|----------------------|------|------------------|------------------|------------------------|-----------------------------------------------------|----------------------|-----------|
| 1 | randomised trials | not serious | not serious | not serious | serious <sup>b</sup> | none | 818/3815 (21.4%) | 904/3962 (22.8%) | OR 0.92 (0.83 to 1.03) | <b>14 fewer per 1,000</b> (from 31 fewer to 5 more) | ⊕⊕⊕<br>○<br>Moderate | IMPORTANT |
|---|-------------------|-------------|-------------|-------------|----------------------|------|------------------|------------------|------------------------|-----------------------------------------------------|----------------------|-----------|

#### Progression to Invasive ventilation

|   |                   |             |             |             |                      |      |                 |                 |                        |                                                    |                      |          |
|---|-------------------|-------------|-------------|-------------|----------------------|------|-----------------|-----------------|------------------------|----------------------------------------------------|----------------------|----------|
| 1 | randomised trials | not serious | not serious | not serious | serious <sup>d</sup> | none | 259/3815 (6.8%) | 228/3962 (5.8%) | OR 1.19 (0.99 to 1.43) | <b>10 more per 1,000</b> (from 1 fewer to 23 more) | ⊕⊕⊕<br>○<br>Moderate | CRITICAL |
|---|-------------------|-------------|-------------|-------------|----------------------|------|-----------------|-----------------|------------------------|----------------------------------------------------|----------------------|----------|

#### Mechanical ventilation OR death

|   |                   |             |             |             |                      |      |                   |                   |                        |                                                    |                      |          |
|---|-------------------|-------------|-------------|-------------|----------------------|------|-------------------|-------------------|------------------------|----------------------------------------------------|----------------------|----------|
| 1 | randomised trials | not serious | not serious | not serious | serious <sup>b</sup> | none | 1344/5342 (25.2%) | 1343/5469 (24.6%) | RR 1.02 (0.96 to 1.09) | <b>5 more per 1,000</b> (from 10 fewer to 22 more) | ⊕⊕⊕<br>○<br>Moderate | CRITICAL |
|---|-------------------|-------------|-------------|-------------|----------------------|------|-------------------|-------------------|------------------------|----------------------------------------------------|----------------------|----------|

CI: confidence interval; OR: odds ratio; RR: risk ratio

### Explanations

a. Small sample size

b. CI shows both beneficial and detrimental effects

c. Wide CI

d. CI shows appreciable harm

N.B. Mortality, Deterioration (defined as 2 points worsening on the WHO ordinal scale), ICU admission and adverse effect (diarrhoea) were the only measurable endpoints found for colchicine.

Additional endpoints not included in the evidence table which were searched for but were either not studied or data was not found in an extractable format were; Clinical resolution or cure (also includes the reverse i.e patients not cured); Time to clinical improvement or resolution on an ordinal scale; Requirement for oxygen; Hospital admission; Ordinal scale or clinical status at day 28; ICU length of stay; Need for non-invasive ventilation; DLCO and HRCT at 28 days and 3 months (and 6months); Hospital length of stay; Severity of symptoms; Improvement in oxygen saturations or arterial blood gases; Relapse; Viral clearance (negative SARS-CoV-2 test) and Duration of fever.



**PICO Question 7:** Is Lopinavir-Ritonavir, in comparison to standard care (defined as control, placebo or normal background therapy), beneficial in the treatment for COVID-19?

**Setting:** Hospitalised patients

**Bibliography:**

1. Lopinavir-ritonavir in patients admitted to hospital with COVID-19 (RECOVERY): a randomised, controlled, open-label, platform trial. RECOVERY Collaborative Group. Lancet. 2020 Oct 5:S0140-6736(20)32013-4. doi: 10.1016/S0140-6736(20)32013-4. Online ahead of print.
2. A Trial of Lopinavir-Ritonavir in Adults Hospitalised with Severe COVID-19. Cao B, *et al.* N Engl J Med. 2020 May 7;382(19):1787-1799. doi: 10.1056/NEJMoa2001282. Epub 2020 Mar 18.
3. Repurposed antiviral drugs for COVID-19 –interim WHO SOLIDARITY trial results. WHO Solidarity trial consortium. Pan H, *et al.* medRxiv preprint doi: <https://doi.org/10.1101/2020.10.15.20209817>

| Certainty assessment |              |              |               |              |             |                      | No of patients      |                                                                          | Effect            |                   | Certainty | Importance |
|----------------------|--------------|--------------|---------------|--------------|-------------|----------------------|---------------------|--------------------------------------------------------------------------|-------------------|-------------------|-----------|------------|
| No of studies        | Study design | Risk of bias | Inconsistency | Indirectness | Imprecision | Other considerations | Lopinavir-Ritonavir | Standard care (defined as control, placebo or normal background therapy) | Relative (95% CI) | Absolute (95% CI) |           |            |

**time to clinical improvement (days)**

|   |                   |             |             |             |                      |      |     |     |                           |                                                |                  |          |
|---|-------------------|-------------|-------------|-------------|----------------------|------|-----|-----|---------------------------|------------------------------------------------|------------------|----------|
| 1 | randomised trials | not serious | not serious | not serious | serious <sup>a</sup> | none | -/0 | -/0 | HR 1.31<br>(0.95 to 1.80) | 1 fewer per 1,000<br>(from 2 fewer to 1 fewer) | ⊕⊕⊕○<br>MODERATE | CRITICAL |
|---|-------------------|-------------|-------------|-------------|----------------------|------|-----|-----|---------------------------|------------------------------------------------|------------------|----------|

**Improvement in clinical status on the WHO ordinal scale**

|   |                   |             |             |             |                           |      |                  |                   |                           |                                                  |                  |          |
|---|-------------------|-------------|-------------|-------------|---------------------------|------|------------------|-------------------|---------------------------|--------------------------------------------------|------------------|----------|
| 1 | randomised trials | not serious | not serious | not serious | very serious <sup>a</sup> | none | 78/99<br>(78.8%) | 70/100<br>(70.0%) | OR 1.59<br>(0.84 to 3.03) | 88 more per 1,000<br>(from 38 fewer to 176 more) | ⊕⊕⊕○<br>○<br>LOW | CRITICAL |
|---|-------------------|-------------|-------------|-------------|---------------------------|------|------------------|-------------------|---------------------------|--------------------------------------------------|------------------|----------|

**Mortality**

|   |                   |                      |             |             |                      |      |                     |                     |                           |                                                |                  |          |
|---|-------------------|----------------------|-------------|-------------|----------------------|------|---------------------|---------------------|---------------------------|------------------------------------------------|------------------|----------|
| 3 | randomised trials | serious <sup>b</sup> | not serious | not serious | serious <sup>a</sup> | none | 541/3114<br>(17.4%) | 938/4896<br>(19.2%) | OR 1.02<br>(0.90 to 1.15) | 3 more per 1,000<br>(from 16 fewer to 23 more) | ⊕⊕⊕○<br>○<br>LOW | CRITICAL |
|---|-------------------|----------------------|-------------|-------------|----------------------|------|---------------------|---------------------|---------------------------|------------------------------------------------|------------------|----------|

**Viral load**

|   |                   |             |             |             |                      |      |    |    |   |                                               |                  |           |
|---|-------------------|-------------|-------------|-------------|----------------------|------|----|----|---|-----------------------------------------------|------------------|-----------|
| 1 | randomised trials | not serious | not serious | not serious | serious <sup>a</sup> | none | 59 | 71 | - | MD 7.6 higher<br>(0.49 lower to 15.69 higher) | ⊕⊕⊕○<br>MODERATE | IMPORTANT |
|---|-------------------|-------------|-------------|-------------|----------------------|------|----|----|---|-----------------------------------------------|------------------|-----------|

**Viral clearance**

|   |                   |             |             |             |                      |      |                  |                  |                           |                                                   |                  |           |
|---|-------------------|-------------|-------------|-------------|----------------------|------|------------------|------------------|---------------------------|---------------------------------------------------|------------------|-----------|
| 1 | randomised trials | not serious | not serious | not serious | serious <sup>a</sup> | none | 35/59<br>(59.3%) | 41/71<br>(57.7%) | OR 1.07<br>(0.53 to 2.15) | 16 more per 1,000<br>(from 157 fewer to 169 more) | ⊕⊕⊕○<br>MODERATE | IMPORTANT |
|---|-------------------|-------------|-------------|-------------|----------------------|------|------------------|------------------|---------------------------|---------------------------------------------------|------------------|-----------|

**Adverse events**

| Certainty assessment |                   |              |               |              |                      |                      | № of patients       |                                                                          | Effect                        |                                                        | Certainty     | Importance |
|----------------------|-------------------|--------------|---------------|--------------|----------------------|----------------------|---------------------|--------------------------------------------------------------------------|-------------------------------|--------------------------------------------------------|---------------|------------|
| № of studies         | Study design      | Risk of bias | Inconsistency | Indirectness | Imprecision          | Other considerations | Lopinavir-Ritonavir | Standard care (defined as control, placebo or normal background therapy) | Relative (95% CI)             | Absolute (95% CI)                                      |               |            |
| 1                    | randomised trials | not serious  | not serious   | not serious  | serious <sup>a</sup> | none                 | 46/95 (48.4%)       | 49/99 (49.5%)                                                            | <b>OR 0.96</b> (0.55 to 1.68) | <b>10 fewer per 1,000</b> (from 145 fewer to 127 more) | ⊕⊕⊕○ MODERATE | CRITICAL   |

#### Serious adverse events

|   |                   |             |             |             |                      |      |               |               |                               |                                                       |               |          |
|---|-------------------|-------------|-------------|-------------|----------------------|------|---------------|---------------|-------------------------------|-------------------------------------------------------|---------------|----------|
| 1 | randomised trials | not serious | not serious | not serious | serious <sup>a</sup> | none | 19/95 (20.0%) | 32/99 (32.3%) | <b>OR 0.52</b> (0.27 to 1.01) | <b>124 fewer per 1,000</b> (from 209 fewer to 2 more) | ⊕⊕⊕○ MODERATE | CRITICAL |
|---|-------------------|-------------|-------------|-------------|----------------------|------|---------------|---------------|-------------------------------|-------------------------------------------------------|---------------|----------|

#### Discharge from hospital within 28 days

|   |                   |             |             |             |                      |      |                   |                   |                               |                                                     |               |           |
|---|-------------------|-------------|-------------|-------------|----------------------|------|-------------------|-------------------|-------------------------------|-----------------------------------------------------|---------------|-----------|
| 1 | randomised trials | not serious | not serious | not serious | serious <sup>a</sup> | none | 1113/1616 (68.9%) | 2382/3424 (69.6%) | <b>OR 0.97</b> (0.85 to 1.10) | <b>6 fewer per 1,000</b> (from 35 fewer to 20 more) | ⊕⊕⊕○ MODERATE | IMPORTANT |
|---|-------------------|-------------|-------------|-------------|----------------------|------|-------------------|-------------------|-------------------------------|-----------------------------------------------------|---------------|-----------|

#### Invasive mechanical ventilation

|   |                   |             |             |             |                      |      |                 |                 |                               |                                                    |               |          |
|---|-------------------|-------------|-------------|-------------|----------------------|------|-----------------|-----------------|-------------------------------|----------------------------------------------------|---------------|----------|
| 1 | randomised trials | not serious | not serious | not serious | serious <sup>a</sup> | none | 152/1556 (9.8%) | 279/3280 (8.5%) | <b>OR 1.16</b> (0.95 to 1.43) | <b>12 more per 1,000</b> (from 4 fewer to 32 more) | ⊕⊕⊕○ MODERATE | CRITICAL |
|---|-------------------|-------------|-------------|-------------|----------------------|------|-----------------|-----------------|-------------------------------|----------------------------------------------------|---------------|----------|

**CI:** Confidence interval; **HR:** Hazard Ratio; **OR:** Odds ratio; **MD:** Mean difference

#### Explanations

- Confidence intervals include the possibility of both beneficial and deleterious effects on outcomes
- One study is published only in the form of a pre-print

N.B. Mortality, Time to clinical improvement (days), Time to clinical improvement on the WHO ordinal scale; Viral load and Viral clearance, Need for invasive mechanical ventilation, Discharge from hospital within 28days, Adverse events and Serious adverse events were the measurable endpoints found for Lopinavir-Ritonavir.

Additional endpoints not included in the evidence table which were searched for but were either not studied or data was not found in an extractable format were; Need for ICU admission (incorporating mechanical ventilation/shock/ARDS); Clinical resolution or cure (also includes the reverse i.e patients not cured); Requirement for oxygen; Hospital admission; Hospital length of stay; Need for non-invasive ventilation; Ordinal scale or clinical status at day 28; ICU length of stay; Deterioration in those not requiring ventilation at start of treatment; DLCO and HRCT at 28 days and 3 months (and 6months); Severity of symptoms; Improvement in oxygen saturations or arterial blood gases; Relapse; and Duration of fever.

**PICO Question 8:** Is Remdesivir, in comparison to standard care (defined as control, placebo or normal background therapy), beneficial in the treatment for COVID-19?

**Setting:** Hospitalised patients

**Bibliography:**

1. Effect of Remdesivir vs Standard Care on Clinical Status at 11 Days in Patients With Moderate COVID-19: A Randomised Clinical Trial. Spinner CD, *et al.* JAMA. 2020 Sep 15;324(11):1048-1057. doi: 10.1001/jama.2020.16349.
2. Remdesivir in adults with severe COVID-19: a randomised, double-blind, placebo-controlled, multicentre trial. Wang Y, *et al.* Lancet. 2020 May 16;395(10236):1569-1578. doi: 10.1016/S0140-6736(20)31022-9. Epub 2020 Apr 29.
3. Remdesivir for the Treatment of COVID-19 - Final Report. Beigel JH, *et al.* N Engl J Med. 2020 Oct 8;NEJMoa2007764. doi: 10.1056/NEJMoa2007764. Online ahead of print.
4. Repurposed antiviral drugs for COVID-19 –interim WHO SOLIDARITY trial results. WHO Solidarity trial consortium. Pan H, *et al.* medRxiv preprint doi: <https://doi.org/10.1101/2020.10.15.20209817>

| Certainty assessment |              |              |               |              |             |                      | No of patients |                                                                          | Effect            |                   | Certainty | Importance |
|----------------------|--------------|--------------|---------------|--------------|-------------|----------------------|----------------|--------------------------------------------------------------------------|-------------------|-------------------|-----------|------------|
| No of studies        | Study design | Risk of bias | Inconsistency | Indirectness | Imprecision | Other considerations | Remdesivir     | Standard care (defined as control, placebo or normal background therapy) | Relative (95% CI) | Absolute (95% CI) |           |            |

**Time to Clinical improvement on the WHO ordinal scale**

|   |                   |             |             |             |             |      |     |     |                                |                                                  |              |          |
|---|-------------------|-------------|-------------|-------------|-------------|------|-----|-----|--------------------------------|--------------------------------------------------|--------------|----------|
| 1 | randomised trials | not serious | not serious | not serious | not serious | none | -/0 | -/0 | Rate ratio 1.29 (1.12 to 1.49) | -- per 1000 patient(s) per years (from -- to --) | ⊕⊕⊕⊕<br>HIGH | CRITICAL |
|---|-------------------|-------------|-------------|-------------|-------------|------|-----|-----|--------------------------------|--------------------------------------------------|--------------|----------|

**Proportion of patients with improvement on ordinal scale at designated time point**

|   |                   |             |             |             |             |      |     |     |                        |                                             |              |          |
|---|-------------------|-------------|-------------|-------------|-------------|------|-----|-----|------------------------|---------------------------------------------|--------------|----------|
| 1 | randomised trials | not serious | not serious | not serious | not serious | none | -/0 | -/0 | OR 1.50 (1.18 to 1.91) | 2 fewer per 1,000 (from 2 fewer to 1 fewer) | ⊕⊕⊕⊕<br>HIGH | CRITICAL |
|---|-------------------|-------------|-------------|-------------|-------------|------|-----|-----|------------------------|---------------------------------------------|--------------|----------|

**Clinical recovery**

|   |                   |             |             |             |             |      |                 |                 |                        |                                             |              |          |
|---|-------------------|-------------|-------------|-------------|-------------|------|-----------------|-----------------|------------------------|---------------------------------------------|--------------|----------|
| 1 | randomised trials | not serious | not serious | not serious | not serious | none | 399/541 (73.8%) | 352/521 (67.6%) | OR 1.35 (1.03 to 1.76) | 62 more per 1,000 (from 6 more to 110 more) | ⊕⊕⊕⊕<br>HIGH | CRITICAL |
|---|-------------------|-------------|-------------|-------------|-------------|------|-----------------|-----------------|------------------------|---------------------------------------------|--------------|----------|

**Mortality**

|   |                   |                      |             |             |                      |      |                  |                  |                        |                                             |                  |          |
|---|-------------------|----------------------|-------------|-------------|----------------------|------|------------------|------------------|------------------------|---------------------------------------------|------------------|----------|
| 4 | randomised trials | serious <sup>b</sup> | not serious | not serious | serious <sup>a</sup> | none | 387/3826 (10.1%) | 394/3507 (11.2%) | OR 0.92 (0.79 to 1.07) | 8 fewer per 1,000 (from 21 fewer to 7 more) | ⊕⊕⊕○<br>○<br>LOW | CRITICAL |
|---|-------------------|----------------------|-------------|-------------|----------------------|------|------------------|------------------|------------------------|---------------------------------------------|------------------|----------|

**Conversion to negative viral detection**

| Certainty assessment |                   |              |               |              |                      |                      | № of patients  |                                                                          | Effect                           |                                                          | Certainty        | Importance |
|----------------------|-------------------|--------------|---------------|--------------|----------------------|----------------------|----------------|--------------------------------------------------------------------------|----------------------------------|----------------------------------------------------------|------------------|------------|
| № of studies         | Study design      | Risk of bias | Inconsistency | Indirectness | Imprecision          | Other considerations | Remdesivir     | Standard care (defined as control, placebo or normal background therapy) | Relative (95% CI)                | Absolute (95% CI)                                        |                  |            |
| 1                    | randomised trials | not serious  | not serious   | not serious  | serious <sup>a</sup> | none                 | 99/131 (75.6%) | 54/65 (83.1%)                                                            | <b>OR 0.63</b><br>(0.29 to 1.35) | <b>75 fewer per 1,000</b><br>(from 243 fewer to 38 more) | ⊕⊕⊕○<br>MODERATE | IMPORTANT  |

#### Adverse events

|   |                   |             |             |             |                      |      |                  |                 |                                  |                                                        |                  |          |
|---|-------------------|-------------|-------------|-------------|----------------------|------|------------------|-----------------|----------------------------------|--------------------------------------------------------|------------------|----------|
| 3 | randomised trials | not serious | not serious | not serious | serious <sup>a</sup> | none | 618/1071 (57.7%) | 466/794 (58.7%) | <b>OR 1.05</b><br>(0.71 to 1.55) | <b>7 more per 1,000</b><br>(from 92 fewer to 101 more) | ⊕⊕⊕○<br>MODERATE | CRITICAL |
|---|-------------------|-------------|-------------|-------------|----------------------|------|------------------|-----------------|----------------------------------|--------------------------------------------------------|------------------|----------|

#### Serious adverse events

|   |                   |             |             |             |                          |      |                  |                 |                                  |                                                           |              |          |
|---|-------------------|-------------|-------------|-------------|--------------------------|------|------------------|-----------------|----------------------------------|-----------------------------------------------------------|--------------|----------|
| 3 | randomised trials | not serious | not serious | not serious | not serious <sup>a</sup> | none | 178/1071 (16.6%) | 201/794 (25.3%) | <b>OR 0.67</b><br>(0.53 to 0.85) | <b>68 fewer per 1,000</b><br>(from 101 fewer to 29 fewer) | ⊕⊕⊕⊕<br>HIGH | CRITICAL |
|---|-------------------|-------------|-------------|-------------|--------------------------|------|------------------|-----------------|----------------------------------|-----------------------------------------------------------|--------------|----------|

#### Time to clinical recovery- requiring mechanical ventilation or ECMO

|   |                   |             |             |             |                      |      |     |     |                                          |                                                            |                  |          |
|---|-------------------|-------------|-------------|-------------|----------------------|------|-----|-----|------------------------------------------|------------------------------------------------------------|------------------|----------|
| 1 | randomised trials | not serious | not serious | not serious | serious <sup>a</sup> | none | -/0 | -/0 | <b>Rate ratio 0.98</b><br>(0.70 to 1.36) | <b>-- per 1000 patient(s) per years</b><br>(from -- to --) | ⊕⊕⊕○<br>MODERATE | CRITICAL |
|---|-------------------|-------------|-------------|-------------|----------------------|------|-----|-----|------------------------------------------|------------------------------------------------------------|------------------|----------|

#### Time to clinical recovery- requiring oxygen

|   |                   |             |             |             |             |      |     |     |                                          |                                                            |              |          |
|---|-------------------|-------------|-------------|-------------|-------------|------|-----|-----|------------------------------------------|------------------------------------------------------------|--------------|----------|
| 1 | randomised trials | not serious | not serious | not serious | not serious | none | -/0 | -/0 | <b>Rate ratio 1.45</b><br>(1.18 to 1.79) | <b>-- per 1000 patient(s) per years</b><br>(from -- to --) | ⊕⊕⊕⊕<br>HIGH | CRITICAL |
|---|-------------------|-------------|-------------|-------------|-------------|------|-----|-----|------------------------------------------|------------------------------------------------------------|--------------|----------|

#### time to clinical recovery- receiving high flow oxygen or NIV

|   |                   |             |             |             |                      |      |     |     |                                          |                                                            |                  |          |
|---|-------------------|-------------|-------------|-------------|----------------------|------|-----|-----|------------------------------------------|------------------------------------------------------------|------------------|----------|
| 1 | randomised trials | not serious | not serious | not serious | serious <sup>a</sup> | none | -/0 | -/0 | <b>Rate ratio 1.09</b><br>(0.76 to 1.57) | <b>-- per 1000 patient(s) per years</b><br>(from -- to --) | ⊕⊕⊕○<br>MODERATE | CRITICAL |
|---|-------------------|-------------|-------------|-------------|----------------------|------|-----|-----|------------------------------------------|------------------------------------------------------------|------------------|----------|

#### time to clinical recovery- not receiving oxygen

| Certainty assessment |                   |              |               |              |                      |                      | № of patients |                                                                          | Effect                         |                                                  | Certainty     | Importance |
|----------------------|-------------------|--------------|---------------|--------------|----------------------|----------------------|---------------|--------------------------------------------------------------------------|--------------------------------|--------------------------------------------------|---------------|------------|
| № of studies         | Study design      | Risk of bias | Inconsistency | Indirectness | Imprecision          | Other considerations | Remdesivir    | Standard care (defined as control, placebo or normal background therapy) | Relative (95% CI)              | Absolute (95% CI)                                |               |            |
| 1                    | randomised trials | not serious  | not serious   | not serious  | serious <sup>a</sup> | none                 | -/0           | -/0                                                                      | Rate ratio 1.29 (0.91 to 1.83) | -- per 1000 patient(s) per years (from -- to --) | ⊕⊕⊕○ MODERATE | CRITICAL   |

time to clinical recovery - symptoms less than 10 days

|   |                   |             |             |             |             |      |     |     |                                |                                                  |           |          |
|---|-------------------|-------------|-------------|-------------|-------------|------|-----|-----|--------------------------------|--------------------------------------------------|-----------|----------|
| 1 | randomised trials | not serious | not serious | not serious | not serious | none | -/0 | -/0 | Rate ratio 1.37 (1.14 to 1.64) | -- per 1000 patient(s) per years (from -- to --) | ⊕⊕⊕⊕ HIGH | CRITICAL |
|---|-------------------|-------------|-------------|-------------|-------------|------|-----|-----|--------------------------------|--------------------------------------------------|-----------|----------|

time to clinical recovery- symptoms more than 10 days

|   |                   |             |             |             |                      |      |     |     |                                |                                                  |               |          |
|---|-------------------|-------------|-------------|-------------|----------------------|------|-----|-----|--------------------------------|--------------------------------------------------|---------------|----------|
| 1 | randomised trials | not serious | not serious | not serious | serious <sup>a</sup> | none | -/0 | -/0 | Rate ratio 1.20 (0.94 to 1.52) | -- per 1000 patient(s) per years (from -- to --) | ⊕⊕⊕○ MODERATE | CRITICAL |
|---|-------------------|-------------|-------------|-------------|----------------------|------|-----|-----|--------------------------------|--------------------------------------------------|---------------|----------|

CI: Confidence interval; HR: Hazard Ratio; OR: Odds ratio

#### Explanations

- wide confidence interval that includes both beneficial and detrimental effect
- Includes data from a pre-print manuscript which has not been peer reviewed

N.B. Time to clinical improvement or resolution on an ordinal scale, Time to clinical improvement on the WHO ordinal scale, proportion of patients with improvement on ordinal scale at designated time point, Clinical recovery, Mortality, Viral clearance (negative SARS-CoV-2 test), Adverse events, serious adverse events, Time to clinical recovery – requiring mechanical ventilation or ECMO, Time to clinical recovery – requiring oxygen and Time to clinical recovery – receiving high flow oxygen or NIV were the measurable endpoints found for remdesivir.

Additional endpoints not included in the evidence table which were searched for but were either not studied or data was not found in an extractable format were; Deterioration in those not requiring ventilation at start of treatment; Requirement for oxygen; Hospital admission; ICU length of stay; Need for non-invasive ventilation; DLCO and HRCT at 28 days and 3 months (and 6months); Hospital length of stay; Severity of symptoms; Improvement in oxygen saturations or arterial blood gases; Relapse and Duration of fever.

**PICO Question 9:** Is Interferon  $\beta$ , in comparison to standard care (defined as control, placebo or normal background therapy), beneficial in the treatment for COVID-19?

**Setting:** Hospitalised patients

**Bibliography:**

1. Efficacy and safety of interferon  $\beta$ -1a in treatment of severe COVID-19: A randomised clinical trial. Davoudi-Monfared E, *et al.* medRxiv preprint doi: <https://doi.org/10.1101/2020.05.28.20116467>
2. Interferon  $\beta$ -1b in treatment of severe COVID-19: A randomised clinical trial. Ramani H, *et al.* Int. Immunopharmacology 88 (2020) 106903 <https://doi.org/10.1016/j.intimp.2020.106903>
3. Repurposed antiviral drugs for COVID-19 –interim WHO SOLIDARITY trial results. WHO Solidarity trial consortium. Pan H, *et al.* medRxiv preprint doi: <https://doi.org/10.1101/2020.10.15.20209817>

| Certainty assessment |              |              |               |              |             |                      | No of patients  |                                                                          | Effect            |                   | Certainty | Importance |
|----------------------|--------------|--------------|---------------|--------------|-------------|----------------------|-----------------|--------------------------------------------------------------------------|-------------------|-------------------|-----------|------------|
| No of studies        | Study design | Risk of bias | Inconsistency | Indirectness | Imprecision | Other considerations | Interferon beta | Standard care (defined as control, placebo or normal background therapy) | Relative (95% CI) | Absolute (95% CI) |           |            |

**Mortality**

|   |                   |                           |                           |             |                           |      |                  |                  |                        |                                               |                                                                                                 |          |
|---|-------------------|---------------------------|---------------------------|-------------|---------------------------|------|------------------|------------------|------------------------|-----------------------------------------------|-------------------------------------------------------------------------------------------------|----------|
| 3 | randomised trials | very serious <sup>a</sup> | very serious <sup>b</sup> | not serious | very serious <sup>c</sup> | none | 253/2125 (11.9%) | 239/2122 (11.3%) | OR 0.55 (0.18 to 1.63) | 47 fewer per 1,000 (from 90 fewer to 59 more) | <br>VERY LOW | CRITICAL |
|---|-------------------|---------------------------|---------------------------|-------------|---------------------------|------|------------------|------------------|------------------------|-----------------------------------------------|-------------------------------------------------------------------------------------------------|----------|

**Deterioration (defined as requirement for mechanical ventilation or ICU admission)**

|   |                   |                           |             |             |                           |      |               |               |                        |                                                 |                                                                                                   |           |
|---|-------------------|---------------------------|-------------|-------------|---------------------------|------|---------------|---------------|------------------------|-------------------------------------------------|---------------------------------------------------------------------------------------------------|-----------|
| 2 | randomised trials | very serious <sup>a</sup> | not serious | not serious | very serious <sup>d</sup> | none | 29/75 (38.7%) | 39/72 (54.2%) | OR 0.53 (0.27 to 1.04) | 157 fewer per 1,000 (from 300 fewer to 10 more) | <br>VERY LOW | IMPORTANT |
|---|-------------------|---------------------------|-------------|-------------|---------------------------|------|---------------|---------------|------------------------|-------------------------------------------------|---------------------------------------------------------------------------------------------------|-----------|

CI: Confidence interval; OR: Odds ratio

**Explanations**

- a. Single centre trials with small sample size, unblinded/open label
- b. Highly discordant results between two trials from Iran and the Solidarity trial
- c. Wide confidence intervals include a large benefit and large harm
- d. Wide confidence intervals include the possibility of no meaningful effect of treatment

N.B. Mortality and Deterioration (defined as need for ventilation or ICU admission) were the only measurable endpoints found for interferon- $\beta$ .

Additional endpoints not included in the evidence table which were searched for but were either not studied or data was not found in an extractable format were; Clinical resolution or cure (also includes the reverse i.e patients not cured); Time to clinical improvement or resolution on an ordinal scale; Adverse events; Requirement for oxygen; Hospital admission; Ordinal scale or clinical status at day 28; ICU length of stay; Need for non-invasive ventilation; DLCO and HRCT at 28 days and 3 months (and 6months); Hospital length of stay; Severity of symptoms; Improvement in oxygen saturations or arterial blood gases; Relapse; Viral clearance (negative SARS-CoV-2 test) and Duration of fever.

**PICO Question 10:** Is Anticoagulation, in comparison to no anticoagulation, beneficial in the treatment for COVID-19?

**Setting:** Hospitalised patients

**Bibliography:**

1. the HEP-COVID Investigators (2021) "Efficacy and Safety of Therapeutic-Dose Heparin vs Standard Prophylactic or Intermediate-Dose Heparins for Thromboprophylaxis in High-risk Hospitalised Patients With COVID-19 The HEP-COVID Randomized Clinical Trial" JAMA Intern Med. doi:10.1001/jamainternmed.2021.6203
2. The REMAP-CAP, ACTIV-4a, and ATTACC Investigators (2021) "Therapeutic Anticoagulation with Heparin in Critically Ill Patients with Covid-19" DOI: 10.1056/NEJMoa2103417
3. Anna Cristina Bertoldi Lemos, Douglas Alexandre do Espírito Santo, Máisa Cabetti Salvetti, Renato Noffs Gilio, Lucas Barbosa Agra, Antonio Pazin-Filho, Carlos Henrique Miranda (2020) "Therapeutic versus prophylactic anticoagulation for severe COVID-19: A randomized phase II clinical trial (HESACOVID)" Thrombosis Research 196 (2020) 359–366
4. The ATTACC, ACTIV-4a, and REMAP-CAP Investigators (2021) "Therapeutic Anticoagulation with Heparin in Noncritically Ill Patients with Covid-19" DOI: 10.1056/NEJMoa2105911
5. The ACTION Coalition COVID-19 Brazil IV Investigators (2021) "Therapeutic versus prophylactic anticoagulation for patients admitted to hospital with COVID-19 and elevated D-dimer concentration (ACTION): an open-label, multicentre, randomised, controlled trial" Lancet 2021; 397: 2253–63

| Certainty assessment |              |              |               |              |             |                      | Nº of patients          |                                                                          | Effect            |                   | Certainty | Importance |
|----------------------|--------------|--------------|---------------|--------------|-------------|----------------------|-------------------------|--------------------------------------------------------------------------|-------------------|-------------------|-----------|------------|
| Nº of studies        | Study design | Risk of bias | Inconsistency | Indirectness | Imprecision | Other considerations | anticoagulation therapy | standard care (defined as control, placebo or normal background therapy) | Relative (95% CI) | Absolute (95% CI) |           |            |

**Major bleed**

|   |                   |             |             |             |             |      |                |                |                        |                                                   |                   |          |
|---|-------------------|-------------|-------------|-------------|-------------|------|----------------|----------------|------------------------|---------------------------------------------------|-------------------|----------|
| 5 | randomised trials | not serious | not serious | not serious | not serious | none | 74/2159 (3.4%) | 31/2047 (1.5%) | OR 2.39 (1.56 to 3.66) | <b>20 more per 1,000</b> (from 8 more to 38 more) | ⊕⊕⊕⊕<br>⊕<br>High | CRITICAL |
|---|-------------------|-------------|-------------|-------------|-------------|------|----------------|----------------|------------------------|---------------------------------------------------|-------------------|----------|

**Mortality**

|   |                   |             |             |             |                      |      |                  |                  |                        |                                                    |                       |          |
|---|-------------------|-------------|-------------|-------------|----------------------|------|------------------|------------------|------------------------|----------------------------------------------------|-----------------------|----------|
| 5 | randomised trials | not serious | not serious | not serious | serious <sup>a</sup> | none | 346/2164 (16.0%) | 343/2048 (16.7%) | RR 1.01 (0.88 to 1.14) | <b>2 more per 1,000</b> (from 20 fewer to 23 more) | ⊕⊕⊕⊕<br>○<br>Moderate | CRITICAL |
|---|-------------------|-------------|-------------|-------------|----------------------|------|------------------|------------------|------------------------|----------------------------------------------------|-----------------------|----------|

**Hospital Discharge**

|   |                   |             |             |             |                      |      |                   |                   |                        |                                                     |                       |          |
|---|-------------------|-------------|-------------|-------------|----------------------|------|-------------------|-------------------|------------------------|-----------------------------------------------------|-----------------------|----------|
| 2 | randomised trials | not serious | not serious | not serious | serious <sup>a</sup> | none | 1420/1705 (83.3%) | 1326/1612 (82.3%) | OR 1.00 (0.82 to 1.21) | <b>0 fewer per 1,000</b> (from 31 fewer to 26 more) | ⊕⊕⊕⊕<br>○<br>Moderate | CRITICAL |
|---|-------------------|-------------|-------------|-------------|----------------------|------|-------------------|-------------------|------------------------|-----------------------------------------------------|-----------------------|----------|

**Major thrombotic event or death**

| Certainty assessment |                   |              |               |              |                      |                      | № of patients           |                                                                          | Effect                 |                                                     | Certainty            | Importance |
|----------------------|-------------------|--------------|---------------|--------------|----------------------|----------------------|-------------------------|--------------------------------------------------------------------------|------------------------|-----------------------------------------------------|----------------------|------------|
| № of studies         | Study design      | Risk of bias | Inconsistency | Indirectness | Imprecision          | Other considerations | anticoagulation therapy | standard care (defined as control, placebo or normal background therapy) | Relative (95% CI)      | Absolute (95% CI)                                   |                      |            |
| 4                    | randomised trials | not serious  | not serious   | not serious  | serious <sup>b</sup> | none                 | 390/2151 (18.1%)        | 430/2034 (21.1%)                                                         | OR 0.86 (0.73 to 1.01) | <b>24 fewer per 1,000</b> (from 48 fewer to 2 more) | ⊕⊕⊕<br>○<br>Moderate | CRITICAL   |

#### Major thrombotic event

|   |                   |             |             |             |             |      |                |                 |                        |                                                       |                  |          |
|---|-------------------|-------------|-------------|-------------|-------------|------|----------------|-----------------|------------------------|-------------------------------------------------------|------------------|----------|
| 5 | randomised trials | not serious | not serious | not serious | not serious | none | 86/2160 (4.0%) | 148/2043 (7.2%) | RR 0.58 (0.45 to 0.74) | <b>30 fewer per 1,000</b> (from 40 fewer to 19 fewer) | ⊕⊕⊕<br>⊕<br>High | CRITICAL |
|---|-------------------|-------------|-------------|-------------|-------------|------|----------------|-----------------|------------------------|-------------------------------------------------------|------------------|----------|

#### Organ support-free days

|   |                   |             |             |             |                      |      |     |     |                     |                                     |                      |           |
|---|-------------------|-------------|-------------|-------------|----------------------|------|-----|-----|---------------------|-------------------------------------|----------------------|-----------|
| 2 | randomised trials | not serious | not serious | not serious | serious <sup>a</sup> | none | -/0 | -/0 | 1.03 (0.89 to 1.20) | <b>-- per 1,000</b> (from -- to --) | ⊕⊕⊕<br>○<br>Moderate | IMPORTANT |
|---|-------------------|-------------|-------------|-------------|----------------------|------|-----|-----|---------------------|-------------------------------------|----------------------|-----------|

#### Mortality- ICU only

|   |                   |             |             |             |                      |      |                 |                 |                        |                                                        |                      |          |
|---|-------------------|-------------|-------------|-------------|----------------------|------|-----------------|-----------------|------------------------|--------------------------------------------------------|----------------------|----------|
| 2 | randomised trials | not serious | not serious | not serious | serious <sup>a</sup> | none | 200/544 (36.8%) | 203/574 (35.4%) | OR 0.92 (0.38 to 2.24) | <b>19 fewer per 1,000</b> (from 182 fewer to 197 more) | ⊕⊕⊕<br>○<br>Moderate | CRITICAL |
|---|-------------------|-------------|-------------|-------------|----------------------|------|-----------------|-----------------|------------------------|--------------------------------------------------------|----------------------|----------|

#### Mortality- non-ICU

|   |                   |             |             |             |                      |      |                 |                 |                        |                                                    |                      |          |
|---|-------------------|-------------|-------------|-------------|----------------------|------|-----------------|-----------------|------------------------|----------------------------------------------------|----------------------|----------|
| 2 | randomised trials | not serious | not serious | not serious | serious <sup>a</sup> | none | 121/1491 (8.1%) | 109/1350 (8.1%) | OR 1.11 (0.64 to 1.93) | <b>8 more per 1,000</b> (from 28 fewer to 64 more) | ⊕⊕⊕<br>○<br>Moderate | CRITICAL |
|---|-------------------|-------------|-------------|-------------|----------------------|------|-----------------|-----------------|------------------------|----------------------------------------------------|----------------------|----------|

#### Major thrombosis- ICU

|   |                   |             |             |             |             |      |               |                |                        |                                                      |                  |          |
|---|-------------------|-------------|-------------|-------------|-------------|------|---------------|----------------|------------------------|------------------------------------------------------|------------------|----------|
| 2 | randomised trials | not serious | not serious | not serious | not serious | none | 36/540 (6.7%) | 60/569 (10.5%) | OR 0.60 (0.39 to 0.93) | <b>39 fewer per 1,000</b> (from 61 fewer to 7 fewer) | ⊕⊕⊕<br>⊕<br>High | CRITICAL |
|---|-------------------|-------------|-------------|-------------|-------------|------|---------------|----------------|------------------------|------------------------------------------------------|------------------|----------|

#### Major Thrombosis- non-ICU

|   |                   |             |             |             |             |      |                |                |                        |                                                      |                  |          |
|---|-------------------|-------------|-------------|-------------|-------------|------|----------------|----------------|------------------------|------------------------------------------------------|------------------|----------|
| 2 | randomised trials | not serious | not serious | not serious | not serious | none | 36/1491 (2.4%) | 52/1350 (3.9%) | OR 0.64 (0.41 to 0.99) | <b>14 fewer per 1,000</b> (from 22 fewer to 0 fewer) | ⊕⊕⊕<br>⊕<br>High | CRITICAL |
|---|-------------------|-------------|-------------|-------------|-------------|------|----------------|----------------|------------------------|------------------------------------------------------|------------------|----------|



| Certainty assessment |              |              |               |              |             |                      | № of patients           |                                                                          | Effect            |                   | Certainty | Importance |
|----------------------|--------------|--------------|---------------|--------------|-------------|----------------------|-------------------------|--------------------------------------------------------------------------|-------------------|-------------------|-----------|------------|
| № of studies         | Study design | Risk of bias | Inconsistency | Indirectness | Imprecision | Other considerations | anticoagulation therapy | standard care (defined as control, placebo or normal background therapy) | Relative (95% CI) | Absolute (95% CI) |           |            |

#### Major bleeding- ICU

|   |                   |             |             |             |                        |      |               |               |                        |                                                    |                      |          |
|---|-------------------|-------------|-------------|-------------|------------------------|------|---------------|---------------|------------------------|----------------------------------------------------|----------------------|----------|
| 3 | randomised trials | not serious | not serious | not serious | serious <sup>a,c</sup> | none | 24/584 (4.1%) | 13/610 (2.1%) | OR 1.95 (0.75 to 5.09) | <b>19 more per 1,000</b> (from 5 fewer to 78 more) | ⊕⊕⊕<br>○<br>Moderate | CRITICAL |
|---|-------------------|-------------|-------------|-------------|------------------------|------|---------------|---------------|------------------------|----------------------------------------------------|----------------------|----------|

#### Major bleeding- non-ICU

|   |                   |             |             |             |             |      |                |                |                        |                                                   |                  |          |
|---|-------------------|-------------|-------------|-------------|-------------|------|----------------|----------------|------------------------|---------------------------------------------------|------------------|----------|
| 3 | randomised trials | not serious | not serious | not serious | not serious | none | 50/1575 (3.2%) | 18/1437 (1.3%) | OR 2.63 (1.51 to 4.56) | <b>20 more per 1,000</b> (from 6 more to 42 more) | ⊕⊕⊕<br>⊕<br>High | CRITICAL |
|---|-------------------|-------------|-------------|-------------|-------------|------|----------------|----------------|------------------------|---------------------------------------------------|------------------|----------|

CI: confidence interval; OR: odds ratio; RR: risk ratio

### Explanations

- a. CI shows both beneficial and detrimental effects
- b. CI crosses 1, therefore cannot rule out detrimental effect
- c. Wide CI's

N.B. Mortality was the only measurable endpoint found for anti-coagulants.

Additional endpoints not included in the evidence table which were searched for but were either not studied or data was not found in an extractable format were; Need for ICU admission (incorporating mechanical ventilation/shock/ARDS); Clinical resolution or cure (also includes the reverse i.e patients not cured); Time to clinical improvement or resolution on an ordinal scale; Adverse events; Requirement for oxygen; Hospital admission; Ordinal scale or clinical status at day 28; ICU length of stay; Need for non-invasive ventilation; Deterioration in those not requiring ventilation at start of treatment; DLCO and HRCT at 28 days and 3 months (and 6months); Hospital length of stay; Severity of symptoms; Improvement in oxygen saturations or arterial blood gases; Relapse; Viral clearance (negative SARS-CoV-2 test) and Duration of fever.

Mean length of stay in critical care

| Certainty assessment |                   |              |               |              |                      |                      | No of patients |                                                                          | Effect            |                                          | Certainty            | Importance |
|----------------------|-------------------|--------------|---------------|--------------|----------------------|----------------------|----------------|--------------------------------------------------------------------------|-------------------|------------------------------------------|----------------------|------------|
| No of studies        | Study design      | Risk of bias | Inconsistency | Indirectness | Imprecision          | Other considerations | CPAP           | standard care (defined as control, placebo or normal background therapy) | Relative (95% CI) | Absolute (95% CI)                        |                      |            |
| 1                    | randomised trials | not serious  | not serious   | not serious  | serious <sup>a</sup> | none                 | 377            | 356                                                                      | -                 | MD 0.1 lower (2.22 lower to 2.02 higher) | ⊕⊕⊕<br>○<br>Moderate | IMPORTANT  |

#### Mean duration of invasive mechanical ventilation

|   |                   |             |             |             |                      |      |     |     |                        |                                             |                      |          |
|---|-------------------|-------------|-------------|-------------|----------------------|------|-----|-----|------------------------|---------------------------------------------|----------------------|----------|
| 1 | randomised trials | not serious | not serious | not serious | serious <sup>a</sup> | none | -/0 | -/0 | HR 0.76 (0.56 to 1.03) | 1 fewer per 1,000 (from 1 fewer to 1 fewer) | ⊕⊕⊕<br>○<br>Moderate | CRITICAL |
|---|-------------------|-------------|-------------|-------------|----------------------|------|-----|-----|------------------------|---------------------------------------------|----------------------|----------|

#### Mean length of hospital stay

|   |                   |             |             |             |                      |      |     |     |   |                                          |                      |           |
|---|-------------------|-------------|-------------|-------------|----------------------|------|-----|-----|---|------------------------------------------|----------------------|-----------|
| 1 | randomised trials | not serious | not serious | not serious | serious <sup>a</sup> | none | 377 | 356 | - | MD 0.9 lower (3.48 lower to 1.68 higher) | ⊕⊕⊕<br>○<br>Moderate | IMPORTANT |
|---|-------------------|-------------|-------------|-------------|----------------------|------|-----|-----|---|------------------------------------------|----------------------|-----------|

#### Mortality

|   |                   |             |             |             |                      |      |                |                |                        |                                               |                      |          |
|---|-------------------|-------------|-------------|-------------|----------------------|------|----------------|----------------|------------------------|-----------------------------------------------|----------------------|----------|
| 1 | randomised trials | not serious | not serious | not serious | serious <sup>a</sup> | none | 63/378 (16.7%) | 69/359 (19.2%) | OR 0.84 (0.58 to 1.23) | 26 fewer per 1,000 (from 71 fewer to 34 more) | ⊕⊕⊕<br>○<br>Moderate | CRITICAL |
|---|-------------------|-------------|-------------|-------------|----------------------|------|----------------|----------------|------------------------|-----------------------------------------------|----------------------|----------|

#### Adverse Events

|   |                   |             |             |             |             |      |                 |                |                        |                                                |              |          |
|---|-------------------|-------------|-------------|-------------|-------------|------|-----------------|----------------|------------------------|------------------------------------------------|--------------|----------|
| 1 | randomised trials | not serious | not serious | not serious | not serious | none | 130/380 (34.2%) | 65/475 (13.7%) | OR 3.28 (2.34 to 4.59) | 205 more per 1,000 (from 134 more to 284 more) | ⊕⊕⊕⊕<br>High | CRITICAL |
|---|-------------------|-------------|-------------|-------------|-------------|------|-----------------|----------------|------------------------|------------------------------------------------|--------------|----------|

#### Serious adverse events

|   |                   |             |             |             |                      |      |              |              |                         |                                              |                      |          |
|---|-------------------|-------------|-------------|-------------|----------------------|------|--------------|--------------|-------------------------|----------------------------------------------|----------------------|----------|
| 1 | randomised trials | not serious | not serious | not serious | serious <sup>b</sup> | none | 7/380 (1.8%) | 1/475 (0.2%) | OR 8.90 (1.09 to 72.62) | 16 more per 1,000 (from 0 fewer to 131 more) | ⊕⊕⊕<br>○<br>Moderate | CRITICAL |
|---|-------------------|-------------|-------------|-------------|----------------------|------|--------------|--------------|-------------------------|----------------------------------------------|----------------------|----------|

#### Median time to death

|   |                   |             |             |             |                      |      |     |     |                        |                                             |                      |          |
|---|-------------------|-------------|-------------|-------------|----------------------|------|-----|-----|------------------------|---------------------------------------------|----------------------|----------|
| 1 | randomised trials | not serious | not serious | not serious | serious <sup>a</sup> | none | -/0 | -/0 | HR 0.86 (0.61 to 1.21) | 1 fewer per 1,000 (from 1 fewer to 1 fewer) | ⊕⊕⊕<br>○<br>Moderate | CRITICAL |
|---|-------------------|-------------|-------------|-------------|----------------------|------|-----|-----|------------------------|---------------------------------------------|----------------------|----------|

CI: confidence interval; HR: hazard Ratio; MD: mean difference; OR: odds ratio



|  |  |  |  |  |  |  |  |  |  |  |  |  |
|--|--|--|--|--|--|--|--|--|--|--|--|--|
|  |  |  |  |  |  |  |  |  |  |  |  |  |
|  |  |  |  |  |  |  |  |  |  |  |  |  |

|  |  |  |  |  |  |  |  |  |  |  |  |  |
|--|--|--|--|--|--|--|--|--|--|--|--|--|
|  |  |  |  |  |  |  |  |  |  |  |  |  |
|--|--|--|--|--|--|--|--|--|--|--|--|--|

|  |  |  |  |  |  |  |  |  |  |  |  |  |
|--|--|--|--|--|--|--|--|--|--|--|--|--|
|  |  |  |  |  |  |  |  |  |  |  |  |  |
|--|--|--|--|--|--|--|--|--|--|--|--|--|

|  |  |  |  |  |  |  |  |  |  |  |  |  |
|--|--|--|--|--|--|--|--|--|--|--|--|--|
|  |  |  |  |  |  |  |  |  |  |  |  |  |
|--|--|--|--|--|--|--|--|--|--|--|--|--|

| Certainty assessment |              |              |               |              |             |                      | Nº of patients |                  | Effect            |                   | Certainty | Importance |
|----------------------|--------------|--------------|---------------|--------------|-------------|----------------------|----------------|------------------|-------------------|-------------------|-----------|------------|
| Nº of studies        | Study design | Risk of bias | Inconsistency | Indirectness | Imprecision | Other considerations | HFNO           | standard of care | Relative (95% CI) | Absolute (95% CI) |           |            |

#### Tracheal intubation or death

|   |                   |             |             |             |                      |      |                 |                 |                        |                                              |               |          |
|---|-------------------|-------------|-------------|-------------|----------------------|------|-----------------|-----------------|------------------------|----------------------------------------------|---------------|----------|
| 1 | randomised trials | not serious | not serious | not serious | serious <sup>a</sup> | none | 184/414 (44.4%) | 166/368 (45.1%) | OR 0.97 (0.73 to 1.29) | 8 fewer per 1,000 (from 76 fewer to 63 more) | ⊕⊕⊕○ Moderate | CRITICAL |
|---|-------------------|-------------|-------------|-------------|----------------------|------|-----------------|-----------------|------------------------|----------------------------------------------|---------------|----------|

#### Tracheal intubation rate

|   |                   |             |             |             |                      |      |                 |                 |                        |                                               |               |          |
|---|-------------------|-------------|-------------|-------------|----------------------|------|-----------------|-----------------|------------------------|-----------------------------------------------|---------------|----------|
| 1 | randomised trials | not serious | not serious | not serious | serious <sup>a</sup> | none | 169/414 (40.8%) | 154/368 (41.8%) | OR 0.96 (0.72 to 1.27) | 10 fewer per 1,000 (from 77 fewer to 59 more) | ⊕⊕⊕○ Moderate | CRITICAL |
|---|-------------------|-------------|-------------|-------------|----------------------|------|-----------------|-----------------|------------------------|-----------------------------------------------|---------------|----------|

#### Admission to critical care

|   |                   |             |             |             |                      |      |                 |                 |                        |                                              |               |          |
|---|-------------------|-------------|-------------|-------------|----------------------|------|-----------------|-----------------|------------------------|----------------------------------------------|---------------|----------|
| 1 | randomised trials | not serious | not serious | not serious | serious <sup>a</sup> | none | 253/416 (60.8%) | 214/368 (58.2%) | OR 1.12 (0.84 to 1.49) | 27 more per 1,000 (from 43 fewer to 93 more) | ⊕⊕⊕○ Moderate | CRITICAL |
|---|-------------------|-------------|-------------|-------------|----------------------|------|-----------------|-----------------|------------------------|----------------------------------------------|---------------|----------|

#### Median time to tracheal intubation

|   |                   |             |             |             |                      |      |     |     |                        |                                             |               |          |
|---|-------------------|-------------|-------------|-------------|----------------------|------|-----|-----|------------------------|---------------------------------------------|---------------|----------|
| 1 | randomised trials | not serious | not serious | not serious | serious <sup>a</sup> | none | 0/0 | 0/0 | HR 0.96 (0.77 to 1.20) | 1 fewer per 1,000 (from 1 fewer to 1 fewer) | ⊕⊕⊕○ Moderate | CRITICAL |
|---|-------------------|-------------|-------------|-------------|----------------------|------|-----|-----|------------------------|---------------------------------------------|---------------|----------|

#### Mean length of stay in critical care

| 2 | randomised trials | not serious | not serious | not serious | serious <sup>a</sup> | none | 426 | 378 | - | MD 0.68 lower (1.39 lower to 0.02 higher) | ⊕⊕⊕⊕○ Moderate | IMPORTA<br>NT |
|---|-------------------|-------------|-------------|-------------|----------------------|------|-----|-----|---|-------------------------------------------|----------------|---------------|

#### Median duration of invasive mechanical ventilation

|   |                   |             |             |             |                      |      |     |     |                        |                                             |                |          |
|---|-------------------|-------------|-------------|-------------|----------------------|------|-----|-----|------------------------|---------------------------------------------|----------------|----------|
| 1 | randomised trials | not serious | not serious | not serious | serious <sup>a</sup> | none | 0/0 | 0/0 | HR 0.93 (0.72 to 1.20) | 1 fewer per 1,000 (from 1 fewer to 1 fewer) | ⊕⊕⊕⊕○ Moderate | CRITICAL |
|---|-------------------|-------------|-------------|-------------|----------------------|------|-----|-----|------------------------|---------------------------------------------|----------------|----------|

#### Mean length of hospital stay

|   |                   |             |             |             |                      |      |     |     |   |                                           |                |               |
|---|-------------------|-------------|-------------|-------------|----------------------|------|-----|-----|---|-------------------------------------------|----------------|---------------|
| 2 | randomised trials | not serious | not serious | not serious | serious <sup>a</sup> | none | 426 | 378 | - | MD 0.85 lower (2.42 lower to 0.71 higher) | ⊕⊕⊕⊕○ Moderate | IMPORTA<br>NT |
|---|-------------------|-------------|-------------|-------------|----------------------|------|-----|-----|---|-------------------------------------------|----------------|---------------|

#### Median time to death

|   |                   |             |             |             |                      |      |     |     |                        |                                             |                |          |
|---|-------------------|-------------|-------------|-------------|----------------------|------|-----|-----|------------------------|---------------------------------------------|----------------|----------|
| 1 | randomised trials | not serious | not serious | not serious | serious <sup>a</sup> | none | 0/0 | 0/0 | HR 0.94 (0.68 to 1.30) | 1 fewer per 1,000 (from 1 fewer to 1 fewer) | ⊕⊕⊕⊕○ Moderate | CRITICAL |
|---|-------------------|-------------|-------------|-------------|----------------------|------|-----|-----|------------------------|---------------------------------------------|----------------|----------|

#### Adverse Events

|   |                   |             |             |             |             |      |                |                |                        |                                              |            |          |
|---|-------------------|-------------|-------------|-------------|-------------|------|----------------|----------------|------------------------|----------------------------------------------|------------|----------|
| 1 | randomised trials | not serious | not serious | not serious | not serious | none | 86/417 (20.6%) | 65/475 (13.7%) | OR 1.64 (1.15 to 2.33) | 70 more per 1,000 (from 17 more to 133 more) | ⊕⊕⊕⊕⊕ High | CRITICAL |
|---|-------------------|-------------|-------------|-------------|-------------|------|----------------|----------------|------------------------|----------------------------------------------|------------|----------|

#### Serious adverse events

|   |                   |             |             |             |                      |      |              |              |                        |                                             |                |          |
|---|-------------------|-------------|-------------|-------------|----------------------|------|--------------|--------------|------------------------|---------------------------------------------|----------------|----------|
| 1 | randomised trials | not serious | not serious | not serious | serious <sup>a</sup> | none | 0/417 (0.0%) | 1/475 (0.2%) | OR 0.38 (0.02 to 9.32) | 1 fewer per 1,000 (from 2 fewer to 17 more) | ⊕⊕⊕⊕○ Moderate | CRITICAL |
|---|-------------------|-------------|-------------|-------------|----------------------|------|--------------|--------------|------------------------|---------------------------------------------|----------------|----------|

#### Intubation within 30days

|   |                   |             |             |             |                      |      |                 |                 |                        |                                               |                |          |
|---|-------------------|-------------|-------------|-------------|----------------------|------|-----------------|-----------------|------------------------|-----------------------------------------------|----------------|----------|
| 2 | randomised trials | not serious | not serious | not serious | serious <sup>a</sup> | none | 204/513 (39.8%) | 204/468 (43.6%) | OR 0.86 (0.66 to 1.10) | 37 fewer per 1,000 (from 98 fewer to 24 more) | ⊕⊕⊕⊕○ Moderate | CRITICAL |
|---|-------------------|-------------|-------------|-------------|----------------------|------|-----------------|-----------------|------------------------|-----------------------------------------------|----------------|----------|

#### Mortality

|   |                   |             |             |             |                      |      |                |                |                        |                                               |                |          |
|---|-------------------|-------------|-------------|-------------|----------------------|------|----------------|----------------|------------------------|-----------------------------------------------|----------------|----------|
| 2 | randomised trials | not serious | not serious | not serious | serious <sup>a</sup> | none | 86/514 (16.7%) | 90/470 (19.1%) | RR 0.87 (0.66 to 1.13) | 25 fewer per 1,000 (from 65 fewer to 25 more) | ⊕⊕⊕⊕○ Moderate | CRITICAL |
|---|-------------------|-------------|-------------|-------------|----------------------|------|----------------|----------------|------------------------|-----------------------------------------------|----------------|----------|

#### Improvement in ordinal scale

| 1 | randomised trials | not serious | not serious | not serious | serious <sup>a</sup> | none | 77/99 (77.8%) | 71/100 (71.0%) | OR 1.43 (0.75 to 2.71) | 68 more per 1,000 (from 63 fewer to 159 more) | <br>Moderate | CRITICAL |  |  |
|---|-------------------|-------------|-------------|-------------|----------------------|------|---------------|----------------|------------------------|-----------------------------------------------|-------------------------------------------------------------------------------------------------|----------|--|--|

CI: confidence interval; HR: hazard Ratio; MD: mean difference; OR: odds ratio; RR: risk ratio

### Explanations

a. CI shows both beneficial and detrimental effects

**PICO Question 12:** Should convalescent plasma compared to standard care (defined as control, placebo or normal background therapy) be used for COVID-19

**Setting:** hospital

### Bibliography:

1. RECOVERY Collaborative Group (2021) "Convalescent plasma in patients admitted to hospital with COVID-19 (RECOVERY): a randomised controlled, open-label, platform trial" *Lancet* 2021; 397: 2049–59 [https://doi.org/10.1016/S0140-6736\(21\)00897-7](https://doi.org/10.1016/S0140-6736(21)00897-7)
2. INFANT–COVID-19 Group (2021) "Early High-Titer Plasma Therapy to Prevent Severe Covid-19 in Older Adults" *N Engl J Med* 2021;384:610-8. DOI: 10.1056/NEJMoa2033700
3. Bennett-Guerrero, E. *et al.* Severe Acute Respiratory Syndrome Coronavirus 2 Convalescent Plasma Versus Standard Plasma in Coronavirus Disease 2019 Infected Hospitalised Patients in New York: A Double-Blind Randomized Trial\*. *Crit. Care Med.* 1015–1025 (2021) doi:10.1097/CCM.0000000000005066.
4. Hassan Abolghasemi, Peyman Eshghi, Abdol Majid Cheraghali, Abbas Ali Imani Fooladi, Farzaneh Bolouki Moghaddam, Sina Imanizadeh, ...Samira Shahverdi (2020) "Clinical efficacy of convalescent plasma for treatment of COVID-19 infections: Results of a multicenter clinical study" *Transfusion and Apheresis Science* 59 (2020) 102875 <https://doi.org/10.1016/j.transci.2020.102875>
5. Ling Li, Wei Zhang, Yu Hu, Xunliang Tong, Shangen Zheng, Juntao Yang, ...Zhong Liu (2020) "Effect of Convalescent Plasma Therapy on Time to Clinical Improvement in Patients With Severe and Life-threatening COVID-19 A Randomized Clinical Trial" *JAMA.* 2020;324(5):460-470. doi:10.1001/jama.2020.10044
6. Manaf AlQahtani, Abdulkarim Abdulrahman, Abdulrahman Almadani, Salman Yousif Alali, Alaa Mahmood Al Zamrooni, Amal Hamza Hejab, Ronán M. Conroy, Pearl Wasif, Sameer Ootom, Stephen L. Atkin, Manal Abduljalil (2020) "Randomized controlled trial of convalescent plasma therapy against standard therapy in patients with severe COVID-19disease" *Scientific Reports* (2021) 11:9927 <https://doi.org/10.1038/s41598-021-89444-5>
7. Max R. O'Donnell, ... , Andrew Eisenberger, Walter I. Lipkin (2021) "A randomized double-blind controlled trial of convalescent plasma in adults with severe COVID-19" *J Clin Invest.* 2021;131(13):e150646. <https://doi.org/10.1172/JCI150646>
8. Kirenga B, Byakika-Kibwika P, Muttamba W, ...William Bazeyo (2021). "Efficacy of convalescent plasma for treatment of COVID-19 in Uganda". *BMJ Open Res* 2021;8:e001017. doi:10.1136/bmjresp-2021-001017
9. the PLACID Trial Collaborators (2020) "Convalescent plasma in the management of moderate covid-19 in adults in India: open label phase II multicentre randomised controlled trial (PLACID Trial)" *BMJ* 2020;371:m3939 | doi: 10.1136/bmj.m3939
10. Mandana Pouladzadeh, Mehdi Safdarian, Peyman Eshghi, Hassan Abolghasemi, Alireza Ghorbani bavani, Behnam Sheibani, Parastoo Moradi Choghakabodi, Abdolaziz Fegghi, Mehri Ghafourian Boroujerdnia, Arash Forouzan, Mohammad Ali Jalali Far, Gholam Abbas Kaydani, Elham Rajaei, Mansour Amin, Mehdi Torabizadeh, Farid Yousefi, Reza Hadaddezfali (2020) "A randomized clinical trial evaluating the immunomodulatory effect of convalescent plasma on COVID-19-related cytokine storm" *Internal and Emergency Medicine* <https://doi.org/10.1007/s11739-021-02734-8>

11. Sekine L, Arns B, Fabro BR, et al. Convalescent plasma for COVID-19 in hospitalised patients: an open-label, randomised clinical trial. Eur Respir J 2021; in press (<https://doi.org/10.1183/13993003.01471-2021>).
12. the PlasmAr Study Group (2020) "A Randomized Trial of Convalescent Plasma in Covid-19 Severe Pneumonia" N Engl J Med 2021;384:619-29. DOI: 10.1056/NEJMoa2031304
13. Anwar M. Rasheed, Dhurgham F Fatak, Hashim A. Hashim, Mohammed F, Maulood2, Khulood K Kabah, Yaqoob A. Almusawi, Ahmed S Abdulmir (2020) "The therapeutic effectiveness of Convalescent plasma therapy on treating COVID-19 patients residing in respiratory care units in Baghdad, Iraq" medRxiv preprint doi: <https://doi.org/10.1101/2020.06.24.20121905>
14. the CAPSID Clinical Trial Group (2021) "High Dose Convalescent Plasma in COVID-19: Results from the Randomized Trial CAPSID" medRxiv preprint doi: <https://doi.org/10.1101/2021.05.10.21256192>
15. the CONCOR-1 Study Group (2021) "Convalescent plasma for hospitalised patients with COVID-19 and the effect of plasma antibodies: a randomized controlled, open-label trial" medRxiv preprint doi: <https://doi.org/10.1101/2021.06.29.21259427>
16. Arvind Gharbharan, Carlijn C.E. Jordans, Corinne Geurtsvankessel, Jan G. den Hollander, Faiz Karim, Femke P. N. Mollema, ...Bart J.A. Rijnders (2020) "Convalescent Plasma for COVID-19. A randomized clinical trial" medRxiv preprint doi: <https://doi.org/10.1101/2020.07.01.20139857>
17. the ConPlas-19 study group (2020) "Convalescent Plasma for COVID-19: A multicenter, randomized clinical trial" medRxiv preprint doi: <https://doi.org/10.1101/2020.08.26.20182444>

| Certainty assessment |              |              |               |              |             |                      | No of patients      |                                                                          | Effect            |                   | Certainty | Importance |
|----------------------|--------------|--------------|---------------|--------------|-------------|----------------------|---------------------|--------------------------------------------------------------------------|-------------------|-------------------|-----------|------------|
| No of studies        | Study design | Risk of bias | Inconsistency | Indirectness | Imprecision | Other considerations | Convalescent plasma | standard care (defined as control, placebo or normal background therapy) | Relative (95% CI) | Absolute (95% CI) |           |            |

#### Mortality

|    |                   |                      |             |                      |                      |      |                   |                   |                        |                                                    |                                                                                                   |          |
|----|-------------------|----------------------|-------------|----------------------|----------------------|------|-------------------|-------------------|------------------------|----------------------------------------------------|---------------------------------------------------------------------------------------------------|----------|
| 17 | randomised trials | serious <sup>a</sup> | not serious | serious <sup>b</sup> | serious <sup>c</sup> | none | 1704/7673 (22.2%) | 1643/7154 (23.0%) | OR 0.97 (0.89 to 1.04) | <b>5 fewer per 1,000</b> (from 20 fewer to 7 more) | <br>Very low | CRITICAL |
|----|-------------------|----------------------|-------------|----------------------|----------------------|------|-------------------|-------------------|------------------------|----------------------------------------------------|---------------------------------------------------------------------------------------------------|----------|

#### Adverse Events

|   |                   |                      |             |                      |                        |      |                   |                   |                        |                                                    |                                                                                                   |          |
|---|-------------------|----------------------|-------------|----------------------|------------------------|------|-------------------|-------------------|------------------------|----------------------------------------------------|---------------------------------------------------------------------------------------------------|----------|
| 9 | randomised trials | serious <sup>a</sup> | not serious | serious <sup>b</sup> | serious <sup>c,d</sup> | none | 1857/6545 (28.4%) | 1733/6275 (27.6%) | OR 1.03 (0.95 to 1.11) | <b>6 more per 1,000</b> (from 10 fewer to 21 more) | <br>Very low | CRITICAL |
|---|-------------------|----------------------|-------------|----------------------|------------------------|------|-------------------|-------------------|------------------------|----------------------------------------------------|---------------------------------------------------------------------------------------------------|----------|

#### Serious Adverse Events

|   |                   |                      |             |             |                      |      |                  |                 |                        |                                                     |                                                                                              |          |
|---|-------------------|----------------------|-------------|-------------|----------------------|------|------------------|-----------------|------------------------|-----------------------------------------------------|----------------------------------------------------------------------------------------------|----------|
| 6 | randomised trials | serious <sup>a</sup> | not serious | not serious | serious <sup>c</sup> | none | 342/1139 (30.0%) | 162/594 (27.3%) | OR 1.17 (0.93 to 1.46) | <b>32 more per 1,000</b> (from 14 fewer to 81 more) | <br>Low | CRITICAL |
|---|-------------------|----------------------|-------------|-------------|----------------------|------|------------------|-----------------|------------------------|-----------------------------------------------------|----------------------------------------------------------------------------------------------|----------|

#### Proportion discharged

|   |                   |                      |             |             |                      |      |                   |                   |                        |                                                    |                                                                                              |          |
|---|-------------------|----------------------|-------------|-------------|----------------------|------|-------------------|-------------------|------------------------|----------------------------------------------------|----------------------------------------------------------------------------------------------|----------|
| 6 | randomised trials | serious <sup>a</sup> | not serious | not serious | serious <sup>c</sup> | none | 4119/6289 (65.5%) | 3989/6092 (65.5%) | OR 1.01 (0.93 to 1.08) | <b>2 more per 1,000</b> (from 17 fewer to 17 more) | <br>Low | CRITICAL |
|---|-------------------|----------------------|-------------|-------------|----------------------|------|-------------------|-------------------|------------------------|----------------------------------------------------|----------------------------------------------------------------------------------------------|----------|

#### Progression to non-invasive ventilation



| Certainty assessment |                   |                      |               |                      |                      |                      | Nº of patients      |                                                                          | Effect                 |                                                     | Certainty                                                                                       | Importance |
|----------------------|-------------------|----------------------|---------------|----------------------|----------------------|----------------------|---------------------|--------------------------------------------------------------------------|------------------------|-----------------------------------------------------|-------------------------------------------------------------------------------------------------|------------|
| Nº of studies        | Study design      | Risk of bias         | Inconsistency | Indirectness         | Imprecision          | Other considerations | Convalescent plasma | standard care (defined as control, placebo or normal background therapy) | Relative (95% CI)      | Absolute (95% CI)                                   |                                                                                                 |            |
| 4                    | randomised trials | serious <sup>a</sup> | not serious   | serious <sup>b</sup> | serious <sup>c</sup> | none                 | 888/3951 (22.5%)    | 889/3825 (23.2%)                                                         | OR 0.95 (0.86 to 1.06) | <b>9 fewer per 1,000</b> (from 26 fewer to 11 more) | <br>Very low | IMPORTANT  |

#### Progression to invasive ventilation

|   |                   |                      |             |                      |                      |      |                 |                 |                        |                                                    |                                                                                                 |          |
|---|-------------------|----------------------|-------------|----------------------|----------------------|------|-----------------|-----------------|------------------------|----------------------------------------------------|-------------------------------------------------------------------------------------------------|----------|
| 7 | randomised trials | serious <sup>a</sup> | not serious | serious <sup>b</sup> | serious <sup>c</sup> | none | 301/4444 (6.8%) | 300/4077 (7.4%) | RR 0.91 (0.78 to 1.06) | <b>7 fewer per 1,000</b> (from 16 fewer to 4 more) | <br>Very low | CRITICAL |
|---|-------------------|----------------------|-------------|----------------------|----------------------|------|-----------------|-----------------|------------------------|----------------------------------------------------|-------------------------------------------------------------------------------------------------|----------|

#### Negative conversion

|   |                   |                      |                      |             |             |      |                 |                 |                        |                                                       |                                                                                             |           |
|---|-------------------|----------------------|----------------------|-------------|-------------|------|-----------------|-----------------|------------------------|-------------------------------------------------------|---------------------------------------------------------------------------------------------|-----------|
| 2 | randomised trials | serious <sup>a</sup> | serious <sup>a</sup> | not serious | not serious | none | 158/220 (71.8%) | 108/209 (51.7%) | OR 2.32 (1.57 to 3.45) | <b>196 more per 1,000</b> (from 110 more to 270 more) | <br>Low | IMPORTANT |
|---|-------------------|----------------------|----------------------|-------------|-------------|------|-----------------|-----------------|------------------------|-------------------------------------------------------|---------------------------------------------------------------------------------------------|-----------|

#### Improvement in ordinal scale

|   |                   |                      |             |             |                      |      |                |                |                        |                                                      |                                                                                              |           |
|---|-------------------|----------------------|-------------|-------------|----------------------|------|----------------|----------------|------------------------|------------------------------------------------------|----------------------------------------------------------------------------------------------|-----------|
| 4 | randomised trials | serious <sup>a</sup> | not serious | not serious | serious <sup>c</sup> | none | 80/184 (43.5%) | 58/139 (41.7%) | OR 1.44 (0.90 to 2.31) | <b>90 more per 1,000</b> (from 25 fewer to 206 more) | <br>Low | IMPORTANT |
|---|-------------------|----------------------|-------------|-------------|----------------------|------|----------------|----------------|------------------------|------------------------------------------------------|----------------------------------------------------------------------------------------------|-----------|

#### Length of hospital stay

|   |                   |                      |             |             |                      |      |     |     |                        |                                                    |                                                                                              |           |
|---|-------------------|----------------------|-------------|-------------|----------------------|------|-----|-----|------------------------|----------------------------------------------------|----------------------------------------------------------------------------------------------|-----------|
| 5 | randomised trials | serious <sup>a</sup> | not serious | not serious | serious <sup>c</sup> | none | -/0 | -/0 | HR 1.05 (0.87 to 1.26) | <b>1 fewer per 1,000</b> (from 1 fewer to 1 fewer) | <br>Low | IMPORTANT |
|---|-------------------|----------------------|-------------|-------------|----------------------|------|-----|-----|------------------------|----------------------------------------------------|----------------------------------------------------------------------------------------------|-----------|

#### Progression to severe disease

|   |                   |                      |             |                      |                      |      |               |                |                        |                                                     |                                                                                                   |           |
|---|-------------------|----------------------|-------------|----------------------|----------------------|------|---------------|----------------|------------------------|-----------------------------------------------------|---------------------------------------------------------------------------------------------------|-----------|
| 3 | randomised trials | serious <sup>a</sup> | not serious | serious <sup>b</sup> | serious <sup>c</sup> | none | 35/352 (9.9%) | 47/336 (14.0%) | RR 0.69 (0.46 to 1.04) | <b>43 fewer per 1,000</b> (from 76 fewer to 6 more) | <br>Very low | IMPORTANT |
|---|-------------------|----------------------|-------------|----------------------|----------------------|------|---------------|----------------|------------------------|-----------------------------------------------------|---------------------------------------------------------------------------------------------------|-----------|

#### ICU admission

| Certainty assessment |                   |                      |               |                      |                      |                      | № of patients       |                                                                          | Effect                 |                                                      | Certainty        | Importance |
|----------------------|-------------------|----------------------|---------------|----------------------|----------------------|----------------------|---------------------|--------------------------------------------------------------------------|------------------------|------------------------------------------------------|------------------|------------|
| № of studies         | Study design      | Risk of bias         | Inconsistency | Indirectness         | Imprecision          | Other considerations | Convalescent plasma | standard care (defined as control, placebo or normal background therapy) | Relative (95% CI)      | Absolute (95% CI)                                    |                  |            |
| 1                    | randomised trials | serious <sup>a</sup> | not serious   | serious <sup>b</sup> | serious <sup>c</sup> | none                 | 2/80 (2.5%)         | 6/80 (7.5%)                                                              | RR 0.33 (0.07 to 1.60) | <b>50 fewer per 1,000</b> (from 70 fewer to 45 more) | ⊕○○○<br>Very low | CRITICAL   |

#### Progression to severe disease or death

|   |                   |             |             |             |                      |      |                |                |                        |                                                    |                  |          |
|---|-------------------|-------------|-------------|-------------|----------------------|------|----------------|----------------|------------------------|----------------------------------------------------|------------------|----------|
| 1 | randomised trials | not serious | not serious | not serious | serious <sup>c</sup> | none | 44/235 (18.7%) | 41/229 (17.9%) | RR 1.05 (0.71 to 1.54) | <b>9 more per 1,000</b> (from 52 fewer to 97 more) | ⊕⊕⊕○<br>Moderate | CRITICAL |
|---|-------------------|-------------|-------------|-------------|----------------------|------|----------------|----------------|------------------------|----------------------------------------------------|------------------|----------|

CI: confidence interval; HR: hazard Ratio; OR: odds ratio; RR: risk ratio

### Explanations

a. Includes trials which were terminated early

b. Includes a study of mild disease

c. CI shows both beneficial and detrimental effects

d. Includes studies with significantly wide CI's for specific outcome

e. Heterogeneity between studies

**PICO Question 13:** Should other monoclonal antibodies compared to standard care (defined as control, placebo or normal background therapy) be used for COVID-19

**Setting:** hospital

**Bibliography:**

1. RECOVERY Collaborative Group. (2021) "Casirivimab and imdevimab in patients admitted to hospital with COVID-19 (RECOVERY): a randomised, controlled, open-label, platform trial." medRxiv preprint doi: <https://doi.org/10.1101/2021.06.15.21258542>

2. ACTIV-3/TICO LY-CoV555 Study Group (2021) A Neutralizing Monoclonal Antibody for Hospitalised Patients with Covid-19. N Engl J Med 2021;384:905-14. DOI: 10.1056/NEJMoa2033130

| Certainty assessment |              |              |               |              |             |                      | No of patients              |                                                                          | Effect            |                   | Certainty | Importance |
|----------------------|--------------|--------------|---------------|--------------|-------------|----------------------|-----------------------------|--------------------------------------------------------------------------|-------------------|-------------------|-----------|------------|
| No of studies        | Study design | Risk of bias | Inconsistency | Indirectness | Imprecision | Other considerations | other monoclonal antibodies | standard care (defined as control, placebo or normal background therapy) | Relative (95% CI) | Absolute (95% CI) |           |            |

#### Mortality

|   |                   |             |             |             |                      |      |                  |                   |                        |                                                     |                                                                                                 |          |
|---|-------------------|-------------|-------------|-------------|----------------------|------|------------------|-------------------|------------------------|-----------------------------------------------------|-------------------------------------------------------------------------------------------------|----------|
| 2 | randomised trials | not serious | not serious | not serious | serious <sup>a</sup> | none | 953/5002 (19.1%) | 1031/5097 (20.2%) | RR 0.94 (0.87 to 1.02) | <b>12 fewer per 1,000</b> (from 26 fewer to 4 more) | <br>Moderate | CRITICAL |
|---|-------------------|-------------|-------------|-------------|----------------------|------|------------------|-------------------|------------------------|-----------------------------------------------------|-------------------------------------------------------------------------------------------------|----------|

#### Adverse events (organ dysfunction or serious infection)

|   |                   |             |             |             |                      |      |                |                |                        |                                                      |                                                                                                   |          |
|---|-------------------|-------------|-------------|-------------|----------------------|------|----------------|----------------|------------------------|------------------------------------------------------|---------------------------------------------------------------------------------------------------|----------|
| 1 | randomised trials | not serious | not serious | not serious | serious <sup>a</sup> | none | 49/163 (30.1%) | 37/151 (24.5%) | OR 1.32 (0.80 to 2.18) | <b>55 more per 1,000</b> (from 39 fewer to 169 more) | <br>Moderate | CRITICAL |
|---|-------------------|-------------|-------------|-------------|----------------------|------|----------------|----------------|------------------------|------------------------------------------------------|---------------------------------------------------------------------------------------------------|----------|

#### Death, SAE or AE grade 3/4

|   |                   |             |             |             |                      |      |                |                |                        |                                                      |                                                                                                   |          |
|---|-------------------|-------------|-------------|-------------|----------------------|------|----------------|----------------|------------------------|------------------------------------------------------|---------------------------------------------------------------------------------------------------|----------|
| 1 | randomised trials | not serious | not serious | not serious | serious <sup>a</sup> | none | 38/163 (23.3%) | 30/151 (19.9%) | OR 1.23 (0.71 to 2.10) | <b>35 more per 1,000</b> (from 49 fewer to 144 more) | <br>Moderate | CRITICAL |
|---|-------------------|-------------|-------------|-------------|----------------------|------|----------------|----------------|------------------------|------------------------------------------------------|---------------------------------------------------------------------------------------------------|----------|

#### Time to improvement

|   |                   |             |             |             |                      |      |  |  |                                |                                                         |                                                                                                   |          |
|---|-------------------|-------------|-------------|-------------|----------------------|------|--|--|--------------------------------|---------------------------------------------------------|---------------------------------------------------------------------------------------------------|----------|
| 1 | randomised trials | not serious | not serious | not serious | serious <sup>a</sup> | none |  |  | Rate ratio 1.06 (0.77 to 1.46) | <b>-- per 1000 patient(s) per years</b> (from -- to --) | <br>Moderate | CRITICAL |
|---|-------------------|-------------|-------------|-------------|----------------------|------|--|--|--------------------------------|---------------------------------------------------------|---------------------------------------------------------------------------------------------------|----------|

#### Proportion discharged

|   |                   |             |             |             |                      |      |                   |                   |                        |                                                    |                                                                                                   |          |
|---|-------------------|-------------|-------------|-------------|----------------------|------|-------------------|-------------------|------------------------|----------------------------------------------------|---------------------------------------------------------------------------------------------------|----------|
| 2 | randomised trials | not serious | not serious | not serious | serious <sup>a</sup> | none | 3518/5002 (70.3%) | 3549/5097 (69.6%) | RR 1.01 (0.98 to 1.04) | <b>7 more per 1,000</b> (from 14 fewer to 28 more) | <br>Moderate | CRITICAL |
|---|-------------------|-------------|-------------|-------------|----------------------|------|-------------------|-------------------|------------------------|----------------------------------------------------|---------------------------------------------------------------------------------------------------|----------|

#### Progression to ventilation

| Certainty assessment |                   |              |               |              |                      |                      | Nº of patients              |                                                                          | Effect                 |                                                      | Certainty                                                                                       | Importance |
|----------------------|-------------------|--------------|---------------|--------------|----------------------|----------------------|-----------------------------|--------------------------------------------------------------------------|------------------------|------------------------------------------------------|-------------------------------------------------------------------------------------------------|------------|
| Nº of studies        | Study design      | Risk of bias | Inconsistency | Indirectness | Imprecision          | Other considerations | other monoclonal antibodies | standard care (defined as control, placebo or normal background therapy) | Relative (95% CI)      | Absolute (95% CI)                                    |                                                                                                 |            |
| 1                    | randomised trials | not serious  | not serious   | not serious  | serious <sup>a</sup> | none                 | 751/3312 (22.7%)            | 793/3325 (23.8%)                                                         | RR 0.95 (0.87 to 1.04) | <b>12 fewer per 1,000</b> (from 31 fewer to 10 more) | <br>Moderate | IMPORTANT  |

#### Progression to NIV

|   |                   |             |             |             |                      |      |                  |                  |                        |                                                     |                                                                                                 |           |
|---|-------------------|-------------|-------------|-------------|----------------------|------|------------------|------------------|------------------------|-----------------------------------------------------|-------------------------------------------------------------------------------------------------|-----------|
| 1 | randomised trials | not serious | not serious | not serious | serious <sup>a</sup> | none | 726/3312 (21.9%) | 765/3325 (23.0%) | RR 0.95 (0.87 to 1.04) | <b>12 fewer per 1,000</b> (from 30 fewer to 9 more) | <br>Moderate | IMPORTANT |
|---|-------------------|-------------|-------------|-------------|----------------------|------|------------------|------------------|------------------------|-----------------------------------------------------|-------------------------------------------------------------------------------------------------|-----------|

#### Progression to IMV

|   |                   |             |             |             |                      |      |                 |                 |                        |                                                    |                                                                                                 |          |
|---|-------------------|-------------|-------------|-------------|----------------------|------|-----------------|-----------------|------------------------|----------------------------------------------------|-------------------------------------------------------------------------------------------------|----------|
| 1 | randomised trials | not serious | not serious | not serious | serious <sup>a</sup> | none | 181/3312 (5.5%) | 211/3325 (6.3%) | RR 0.86 (0.71 to 1.04) | <b>9 fewer per 1,000</b> (from 18 fewer to 3 more) | <br>Moderate | CRITICAL |
|---|-------------------|-------------|-------------|-------------|----------------------|------|-----------------|-----------------|------------------------|----------------------------------------------------|-------------------------------------------------------------------------------------------------|----------|

#### Progression to death or IMV

|   |                   |             |             |             |                      |      |                   |                   |                        |                                                      |                                                                                                   |          |
|---|-------------------|-------------|-------------|-------------|----------------------|------|-------------------|-------------------|------------------------|------------------------------------------------------|---------------------------------------------------------------------------------------------------|----------|
| 1 | randomised trials | not serious | not serious | not serious | serious <sup>a</sup> | none | 1089/4556 (23.9%) | 1151/4642 (24.8%) | RR 0.96 (0.90 to 1.04) | <b>10 fewer per 1,000</b> (from 25 fewer to 10 more) | <br>Moderate | CRITICAL |
|---|-------------------|-------------|-------------|-------------|----------------------|------|-------------------|-------------------|------------------------|------------------------------------------------------|---------------------------------------------------------------------------------------------------|----------|

#### Mortality (seronegative patients only)

|   |                   |             |             |             |             |      |                  |                  |                        |                                                       |                                                                                               |          |
|---|-------------------|-------------|-------------|-------------|-------------|------|------------------|------------------|------------------------|-------------------------------------------------------|-----------------------------------------------------------------------------------------------|----------|
| 1 | randomised trials | not serious | not serious | not serious | not serious | none | 396/1633 (24.2%) | 451/1520 (29.7%) | RR 0.82 (0.73 to 0.92) | <b>53 fewer per 1,000</b> (from 80 fewer to 24 fewer) | <br>High | CRITICAL |
|---|-------------------|-------------|-------------|-------------|-------------|------|------------------|------------------|------------------------|-------------------------------------------------------|-----------------------------------------------------------------------------------------------|----------|

#### Proportion discharged from hospital at 28days (seronegative patients only)

|   |                   |             |             |             |             |      |           |          |                                |                                                         |                                                                                               |          |
|---|-------------------|-------------|-------------|-------------|-------------|------|-----------|----------|--------------------------------|---------------------------------------------------------|-----------------------------------------------------------------------------------------------|----------|
| 1 | randomised trials | not serious | not serious | not serious | not serious | none | 1059/1633 | 888/1520 | Rate ratio 1.19 (1.08 to 1.31) | <b>-- per 1000 patient(s) per years</b> (from -- to --) | <br>High | CRITICAL |
|---|-------------------|-------------|-------------|-------------|-------------|------|-----------|----------|--------------------------------|---------------------------------------------------------|-----------------------------------------------------------------------------------------------|----------|

#### Progression to IMV (seronegative patients only)

|   |                   |             |             |             |                      |      |          |          |                                |                                                         |                                                                                                   |          |
|---|-------------------|-------------|-------------|-------------|----------------------|------|----------|----------|--------------------------------|---------------------------------------------------------|---------------------------------------------------------------------------------------------------|----------|
| 1 | randomised trials | not serious | not serious | not serious | serious <sup>a</sup> | none | 189/1599 | 200/1484 | Rate ratio 0.88 (0.73 to 1.06) | <b>-- per 1000 patient(s) per years</b> (from -- to --) | <br>Moderate | CRITICAL |
|---|-------------------|-------------|-------------|-------------|----------------------|------|----------|----------|--------------------------------|---------------------------------------------------------|---------------------------------------------------------------------------------------------------|----------|

#### Progression to death or IMV (seronegative patients only)

| Certainty assessment |                   |              |               |              |             |                      | Nº of patients              |                                                                          | Effect                         |                                                  | Certainty    | Importance |
|----------------------|-------------------|--------------|---------------|--------------|-------------|----------------------|-----------------------------|--------------------------------------------------------------------------|--------------------------------|--------------------------------------------------|--------------|------------|
| Nº of studies        | Study design      | Risk of bias | Inconsistency | Indirectness | Imprecision | Other considerations | other monoclonal antibodies | standard care (defined as control, placebo or normal background therapy) | Relative (95% CI)              | Absolute (95% CI)                                |              |            |
| 1                    | randomised trials | not serious  | not serious   | not serious  | not serious | none                 | 487/1599                    | 542/1484                                                                 | Rate ratio 0.83 (0.75 to 0.92) | -- per 1000 patient(s) per years (from -- to --) | ⊕⊕⊕⊕<br>High | CRITICAL   |

Progression to NIV (seronegative patients only)

|   |                   |             |             |             |             |      |          |          |                                |                                                  |              |           |
|---|-------------------|-------------|-------------|-------------|-------------|------|----------|----------|--------------------------------|--------------------------------------------------|--------------|-----------|
| 1 | randomised trials | not serious | not serious | not serious | not serious | none | 341/1267 | 360/1143 | Rate ratio 0.85 (0.75 to 0.96) | -- per 1000 patient(s) per years (from -- to --) | ⊕⊕⊕⊕<br>High | IMPORTANT |
|---|-------------------|-------------|-------------|-------------|-------------|------|----------|----------|--------------------------------|--------------------------------------------------|--------------|-----------|

CI: confidence interval; OR: odds ratio; RR: risk ratio

### Explanations

a. CI shows both beneficial and detrimental effects

**PICO Question 14:** IL-1 receptor antagonists compared to standard care (defined as control, placebo or normal background therapy) for COVID-19

**Setting:** hospital

**Bibliography:**

- Derde, L. P. G. (2021). "Effectiveness of Tocilizumab, Sarilumab, and Anakinra for critically ill patients with COVID-19 The REMAP-CAP COVID-19 Immune Modulation Therapy Domain Randomised Clinical Trial." MedRxiv, 2021.06.18.21259133. Retrieved from <http://medrxiv.org/content/early/2021/06/22/2021.06.18.21259133.abstract>
- Roberto Caricchio, MD; Antonio Abbate, MD, PhD; Ivan Gordeev, PhD; Jamie Meng, MD, PhD; Priscilla Y Hsue, MD; Tuhina Neogi, MD, PhD; Roberto Arduino, MD; Daria Fomina, MD; Roman Bogdanov, MD; Tatiana Stepanenko, MD; Pilar Ruiz-Seco, MD; Andrés González-García, MD, PhD; Yu Chen, MSc; Yuhan Li, MSc; Sarah Whelan, BSc, MSc; Stephanie Noviello, MD, MPH; for the CAN-COVID Investigators (2021) "Effect of Canakinumab vs Placebo on Survival Without Invasive Mechanical Ventilation in Patients Hospitalised With Severe COVID-19 A Randomized Clinical Trial" JAMA. 2021;326(3):230-239. doi:10.1001/jama.2021.9508
- The CORIMUNO-19 Collaborative group (2021) "Effect of anakinra versus usual care in adults in hospital with COVID-19 and mild-to-moderate pneumonia (CORIMUNO-ANA-1): a randomised controlled trial" Lancet Respir Med 2021; 9: 295–304 [https://doi.org/10.1016/S2213-2600\(20\)30556-7](https://doi.org/10.1016/S2213-2600(20)30556-7)
- Evdoxia Kyriazopoulou, Garyfallia Poulakou, Haralampos Milionis, Simeon Metallidis, Georgios Adamis, Konstantinos Tsiakos, ...Evangelos J. Giamarellos-Bourboulis (2021) "Early treatment of COVID-19 with anakinra guided by soluble urokinase plasminogen receptor plasma levels: a double-blind, randomized controlled phase 3 trial" <https://doi.org/10.1038/s41591-021-01499-z>

| Certainty assessment |              |              |               |              |             |                      | Nº of patients            |                                                                          | Effect            |                   | Certainty | Importance |
|----------------------|--------------|--------------|---------------|--------------|-------------|----------------------|---------------------------|--------------------------------------------------------------------------|-------------------|-------------------|-----------|------------|
| Nº of studies        | Study design | Risk of bias | Inconsistency | Indirectness | Imprecision | Other considerations | IL-1 receptor antagonists | standard care (defined as control, placebo or normal background therapy) | Relative (95% CI) | Absolute (95% CI) |           |            |

**Adverse events**

|   |                   |             |             |             |                      |      |                 |                 |                        |                                                     |                                                                                                   |          |
|---|-------------------|-------------|-------------|-------------|----------------------|------|-----------------|-----------------|------------------------|-----------------------------------------------------|---------------------------------------------------------------------------------------------------|----------|
| 3 | randomised trials | not serious | not serious | not serious | serious <sup>a</sup> | none | 486/689 (70.5%) | 299/467 (64.0%) | OR 1.05 (0.81 to 1.38) | <b>11 more per 1,000</b> (from 50 fewer to 70 more) | <br>Moderate | CRITICAL |
|---|-------------------|-------------|-------------|-------------|----------------------|------|-----------------|-----------------|------------------------|-----------------------------------------------------|---------------------------------------------------------------------------------------------------|----------|

**Serious adverse events**

|   |                   |             |             |             |                      |      |                 |                 |                        |                                                      |                                                                                                   |          |
|---|-------------------|-------------|-------------|-------------|----------------------|------|-----------------|-----------------|------------------------|------------------------------------------------------|---------------------------------------------------------------------------------------------------|----------|
| 3 | randomised trials | not serious | not serious | not serious | serious <sup>a</sup> | none | 128/689 (18.6%) | 108/467 (23.1%) | OR 0.79 (0.59 to 1.06) | <b>39 fewer per 1,000</b> (from 81 fewer to 11 more) | <br>Moderate | CRITICAL |
|---|-------------------|-------------|-------------|-------------|----------------------|------|-----------------|-----------------|------------------------|------------------------------------------------------|---------------------------------------------------------------------------------------------------|----------|

**Time to hospital discharge**

|   |                   |             |             |             |             |      |  |  |                        |                                                    |                                                                                               |           |
|---|-------------------|-------------|-------------|-------------|-------------|------|--|--|------------------------|----------------------------------------------------|-----------------------------------------------------------------------------------------------|-----------|
| 2 | randomised trials | not serious | not serious | not serious | not serious | none |  |  | HR 1.14 (1.00 to 1.31) | <b>1 fewer per 1,000</b> (from 1 fewer to 1 fewer) | <br>High | IMPORTANT |
|---|-------------------|-------------|-------------|-------------|-------------|------|--|--|------------------------|----------------------------------------------------|-----------------------------------------------------------------------------------------------|-----------|

**Clinical change on OS**

| Certainty assessment |                   |              |               |              |                      |                      | Nº of patients            |                                                                          | Effect                 |                                                    | Certainty                                                                                       | Importance |
|----------------------|-------------------|--------------|---------------|--------------|----------------------|----------------------|---------------------------|--------------------------------------------------------------------------|------------------------|----------------------------------------------------|-------------------------------------------------------------------------------------------------|------------|
| Nº of studies        | Study design      | Risk of bias | Inconsistency | Indirectness | Imprecision          | Other considerations | IL-1 receptor antagonists | standard care (defined as control, placebo or normal background therapy) | Relative (95% CI)      | Absolute (95% CI)                                  |                                                                                                 |            |
| 1                    | randomised trials | not serious  | not serious   | not serious  | serious <sup>a</sup> | none                 |                           |                                                                          | HR 1.18 (0.87 to 1.60) | <b>1 fewer per 1,000</b> (from 2 fewer to 1 fewer) | <br>Moderate | CRITICAL   |

#### Progression to intubation, ECMO or death

|   |                   |             |             |             |                      |      |                 |                 |                        |                                                    |                                                                                                 |          |
|---|-------------------|-------------|-------------|-------------|----------------------|------|-----------------|-----------------|------------------------|----------------------------------------------------|-------------------------------------------------------------------------------------------------|----------|
| 1 | randomised trials | not serious | not serious | not serious | serious <sup>a</sup> | none | 122/228 (53.5%) | 147/276 (53.3%) | OR 1.01 (0.71 to 1.44) | <b>2 more per 1,000</b> (from 85 fewer to 89 more) | <br>Moderate | CRITICAL |
|---|-------------------|-------------|-------------|-------------|----------------------|------|-----------------|-----------------|------------------------|----------------------------------------------------|-------------------------------------------------------------------------------------------------|----------|

#### Proportion discharged

|   |                   |             |             |             |                      |      |               |               |                        |                                                        |                                                                                                 |          |
|---|-------------------|-------------|-------------|-------------|----------------------|------|---------------|---------------|------------------------|--------------------------------------------------------|-------------------------------------------------------------------------------------------------|----------|
| 1 | randomised trials | not serious | not serious | not serious | serious <sup>a</sup> | none | 34/59 (57.6%) | 34/55 (61.8%) | OR 0.84 (0.40 to 1.78) | <b>42 fewer per 1,000</b> (from 225 fewer to 124 more) | <br>Moderate | CRITICAL |
|---|-------------------|-------------|-------------|-------------|----------------------|------|---------------|---------------|------------------------|--------------------------------------------------------|-------------------------------------------------------------------------------------------------|----------|

#### Mechanical ventilation or death

|   |                   |             |             |             |                      |      |               |               |                        |                                                       |                                                                                                   |          |
|---|-------------------|-------------|-------------|-------------|----------------------|------|---------------|---------------|------------------------|-------------------------------------------------------|---------------------------------------------------------------------------------------------------|----------|
| 1 | randomised trials | not serious | not serious | not serious | serious <sup>a</sup> | none | 20/59 (33.9%) | 19/55 (34.5%) | OR 0.97 (0.45 to 2.11) | <b>7 fewer per 1,000</b> (from 154 fewer to 181 more) | <br>Moderate | CRITICAL |
|---|-------------------|-------------|-------------|-------------|----------------------|------|---------------|---------------|------------------------|-------------------------------------------------------|---------------------------------------------------------------------------------------------------|----------|

#### Progression to severe disease or death

|   |                   |             |             |             |             |      |     |     |                        |                                                    |                                                                                               |          |
|---|-------------------|-------------|-------------|-------------|-------------|------|-----|-----|------------------------|----------------------------------------------------|-----------------------------------------------------------------------------------------------|----------|
| 1 | randomised trials | not serious | not serious | not serious | not serious | none | -/0 | -/0 | HR 0.62 (0.45 to 0.85) | <b>1 fewer per 1,000</b> (from 1 fewer to 0 fewer) | <br>High | CRITICAL |
|---|-------------------|-------------|-------------|-------------|-------------|------|-----|-----|------------------------|----------------------------------------------------|-----------------------------------------------------------------------------------------------|----------|

#### Duration of ICU stay

|   |                   |             |             |             |                      |      |  |  |                        |                                                    |                                                                                                   |           |
|---|-------------------|-------------|-------------|-------------|----------------------|------|--|--|------------------------|----------------------------------------------------|---------------------------------------------------------------------------------------------------|-----------|
| 1 | randomised trials | not serious | not serious | not serious | serious <sup>b</sup> | none |  |  | HR 2.33 (1.11 to 4.89) | <b>2 fewer per 1,000</b> (from 5 fewer to 1 fewer) | <br>Moderate | IMPORTANT |
|---|-------------------|-------------|-------------|-------------|----------------------|------|--|--|------------------------|----------------------------------------------------|---------------------------------------------------------------------------------------------------|-----------|

#### Mortality

|   |                   |             |             |             |                      |      |                  |                 |                        |                                                     |                                                                                                   |          |
|---|-------------------|-------------|-------------|-------------|----------------------|------|------------------|-----------------|------------------------|-----------------------------------------------------|---------------------------------------------------------------------------------------------------|----------|
| 4 | randomised trials | not serious | not serious | not serious | serious <sup>a</sup> | none | 183/1052 (17.4%) | 192/872 (22.0%) | OR 0.97 (0.76 to 1.24) | <b>5 fewer per 1,000</b> (from 44 fewer to 39 more) | <br>Moderate | CRITICAL |
|---|-------------------|-------------|-------------|-------------|----------------------|------|------------------|-----------------|------------------------|-----------------------------------------------------|---------------------------------------------------------------------------------------------------|----------|

CI: confidence interval; HR: hazard Ratio; OR: odds ratio

### *Explanations*

- a. CI shows both beneficial and detrimental effects
- b. wide CI



**PICO Question 15** – Should JAK inhibitors compared to standard care (defined as control, placebo or normal background therapy) be used for COVID-19

**Setting:** hospital

**Bibliography:**

1. The STOP-COVID Trial Investigators (2021) "Tofacitinib in Patients Hospitalised with Covid-19 Pneumonia" N Engl J Med 2021;385:406-15. DOI: 10.1056/NEJMoa2101643
2. The COV-BARRIER Study Group (2021) "Efficacy and safety of baricitinib for the treatment of hospitalised adults with COVID-19 (COV-BARRIER): a randomised, double-blind, parallel-group, placebo controlled phase 3 trial" Lancet Respir Med September 1, 2021 [https://doi.org/10.1016/S2213-2600\(21\)00331-3](https://doi.org/10.1016/S2213-2600(21)00331-3)
3. Yang Cao, Jia Wei, Liang Zou, Tiebin Jiang, Gaoxiang Wang, ... Jianfeng Zhou (2020) "Ruxolitinib in treatment of severe coronavirus disease 2019 (COVID-19): A multicenter, single-blind, randomized controlled trial" J Allergy Clin Immunol 2020;146:137-46
4. the ACTT-2 Study Group Members (2021) "Baricitinib plus Remdesivir for Hospitalised Adults with Covid-19" N Engl J Med 2021;384:795-807. DOI: 10.1056/NEJMoa2031994

| Certainty assessment |              |              |               |              |             |                      | No of patients |                                                                          | Effect            |                   | Certainty | Importance |
|----------------------|--------------|--------------|---------------|--------------|-------------|----------------------|----------------|--------------------------------------------------------------------------|-------------------|-------------------|-----------|------------|
| No of studies        | Study design | Risk of bias | Inconsistency | Indirectness | Imprecision | Other considerations | JAK inhibitors | standard care (defined as control, placebo or normal background therapy) | Relative (95% CI) | Absolute (95% CI) |           |            |

**Adverse events**

|   |                   |                      |             |             |                      |      |                  |                  |                        |                                               |                                                                                              |          |
|---|-------------------|----------------------|-------------|-------------|----------------------|------|------------------|------------------|------------------------|-----------------------------------------------|----------------------------------------------------------------------------------------------|----------|
| 4 | randomised trials | serious <sup>a</sup> | not serious | not serious | serious <sup>b</sup> | none | 594/1427 (41.6%) | 619/1433 (43.2%) | OR 0.94 (0.81 to 1.09) | 15 fewer per 1,000 (from 51 fewer to 21 more) | <br>Low | CRITICAL |
|---|-------------------|----------------------|-------------|-------------|----------------------|------|------------------|------------------|------------------------|-----------------------------------------------|----------------------------------------------------------------------------------------------|----------|

**Mortality**

|   |                   |                      |             |             |             |      |                |                  |                        |                                                |                                                                                                   |          |
|---|-------------------|----------------------|-------------|-------------|-------------|------|----------------|------------------|------------------------|------------------------------------------------|---------------------------------------------------------------------------------------------------|----------|
| 4 | randomised trials | serious <sup>a</sup> | not serious | not serious | not serious | none | 90/1443 (6.2%) | 148/1445 (10.2%) | OR 0.58 (0.44 to 0.76) | 40 fewer per 1,000 (from 55 fewer to 23 fewer) | <br>Moderate | CRITICAL |
|---|-------------------|----------------------|-------------|-------------|-------------|------|----------------|------------------|------------------------|------------------------------------------------|---------------------------------------------------------------------------------------------------|----------|

**Length of hospital stay**

|   |                   |             |             |             |                      |      |     |     |                        |                                             |                                                                                                   |           |
|---|-------------------|-------------|-------------|-------------|----------------------|------|-----|-----|------------------------|---------------------------------------------|---------------------------------------------------------------------------------------------------|-----------|
| 1 | randomised trials | not serious | not serious | not serious | serious <sup>b</sup> | none | -/0 | -/0 | HR 1.18 (0.94 to 1.48) | 1 fewer per 1,000 (from 1 fewer to 1 fewer) | <br>Moderate | IMPORTANT |
|---|-------------------|-------------|-------------|-------------|----------------------|------|-----|-----|------------------------|---------------------------------------------|---------------------------------------------------------------------------------------------------|-----------|

**Progression to respiratory failure or death**

|   |                   |             |             |             |             |      |                |                |                        |                                                  |                                                                                               |          |
|---|-------------------|-------------|-------------|-------------|-------------|------|----------------|----------------|------------------------|--------------------------------------------------|-----------------------------------------------------------------------------------------------|----------|
| 1 | randomised trials | not serious | not serious | not serious | not serious | none | 26/144 (18.1%) | 42/145 (29.0%) | RR 0.62 (0.40 to 0.96) | 110 fewer per 1,000 (from 174 fewer to 12 fewer) | 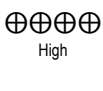<br>High | CRITICAL |
|---|-------------------|-------------|-------------|-------------|-------------|------|----------------|----------------|------------------------|--------------------------------------------------|-----------------------------------------------------------------------------------------------|----------|

**Time to 2+ point WHO scale improvement**

|   |                   |             |             |             |                             |      |     |     |                        |                                             |                                                                                              |          |
|---|-------------------|-------------|-------------|-------------|-----------------------------|------|-----|-----|------------------------|---------------------------------------------|----------------------------------------------------------------------------------------------|----------|
| 1 | randomised trials | not serious | not serious | not serious | very serious <sup>b,c</sup> | none | -/0 | -/0 | HR 1.67 (0.84 to 3.33) | 2 fewer per 1,000 (from 3 fewer to 1 fewer) | <br>Low | CRITICAL |
|---|-------------------|-------------|-------------|-------------|-----------------------------|------|-----|-----|------------------------|---------------------------------------------|----------------------------------------------------------------------------------------------|----------|

| Certainty assessment |              |              |               |              |             |                      | Nº of patients |                                                                          | Effect            |                   | Certainty | Importance |
|----------------------|--------------|--------------|---------------|--------------|-------------|----------------------|----------------|--------------------------------------------------------------------------|-------------------|-------------------|-----------|------------|
| Nº of studies        | Study design | Risk of bias | Inconsistency | Indirectness | Imprecision | Other considerations | JAK inhibitors | standard care (defined as control, placebo or normal background therapy) | Relative (95% CI) | Absolute (95% CI) |           |            |

#### Progression to NIV or HFNO

|   |                   |             |             |             |                      |      |     |     |                                |                                                  |               |           |
|---|-------------------|-------------|-------------|-------------|----------------------|------|-----|-----|--------------------------------|--------------------------------------------------|---------------|-----------|
| 1 | randomised trials | not serious | not serious | not serious | serious <sup>b</sup> | none | -/0 | -/0 | Rate ratio 0.82 (0.60 to 1.12) | -- per 1000 patient(s) per years (from -- to --) | ⊕⊕⊕○ Moderate | IMPORTANT |
|---|-------------------|-------------|-------------|-------------|----------------------|------|-----|-----|--------------------------------|--------------------------------------------------|---------------|-----------|

#### Progression to MV or death

|   |                   |             |             |             |             |      |     |     |                                |                                                  |           |          |
|---|-------------------|-------------|-------------|-------------|-------------|------|-----|-----|--------------------------------|--------------------------------------------------|-----------|----------|
| 1 | randomised trials | not serious | not serious | not serious | not serious | none | -/0 | -/0 | Rate ratio 0.69 (0.50 to 0.95) | -- per 1000 patient(s) per years (from -- to --) | ⊕⊕⊕⊕ High | CRITICAL |
|---|-------------------|-------------|-------------|-------------|-------------|------|-----|-----|--------------------------------|--------------------------------------------------|-----------|----------|

#### Progression to MV or NIV or death

|   |                   |             |             |             |             |      |     |     |                                |                                                  |           |          |
|---|-------------------|-------------|-------------|-------------|-------------|------|-----|-----|--------------------------------|--------------------------------------------------|-----------|----------|
| 1 | randomised trials | not serious | not serious | not serious | not serious | none | -/0 | -/0 | Rate ratio 0.77 (0.60 to 0.99) | -- per 1000 patient(s) per years (from -- to --) | ⊕⊕⊕⊕ High | CRITICAL |
|---|-------------------|-------------|-------------|-------------|-------------|------|-----|-----|--------------------------------|--------------------------------------------------|-----------|----------|

#### Median duration of mechanical ventilation

|   |                   |             |             |             |  |      |     |     |            |             |   |          |
|---|-------------------|-------------|-------------|-------------|--|------|-----|-----|------------|-------------|---|----------|
| 0 | randomised trials | not serious | not serious | not serious |  | none | -/0 | -/0 | not pooled | see comment | - | CRITICAL |
|---|-------------------|-------------|-------------|-------------|--|------|-----|-----|------------|-------------|---|----------|

#### Time to viral clearance

|   |                   |             |             |             |                             |      |     |     |                        |                                             |         |           |
|---|-------------------|-------------|-------------|-------------|-----------------------------|------|-----|-----|------------------------|---------------------------------------------|---------|-----------|
| 1 | randomised trials | not serious | not serious | not serious | very serious <sup>b,c</sup> | none | -/0 | -/0 | HR 0.78 (0.27 to 2.26) | 1 fewer per 1,000 (from 2 fewer to 0 fewer) | ⊕⊕○ Low | IMPORTANT |
|---|-------------------|-------------|-------------|-------------|-----------------------------|------|-----|-----|------------------------|---------------------------------------------|---------|-----------|

#### Serious adverse events

|   |                   |                      |             |             |             |      |                  |                  |                        |                                               |               |          |
|---|-------------------|----------------------|-------------|-------------|-------------|------|------------------|------------------|------------------------|-----------------------------------------------|---------------|----------|
| 4 | randomised trials | serious <sup>a</sup> | not serious | not serious | not serious | none | 212/1427 (14.9%) | 265/1433 (18.5%) | OR 0.77 (0.63 to 0.94) | 36 fewer per 1,000 (from 60 fewer to 9 fewer) | ⊕⊕⊕○ Moderate | CRITICAL |
|---|-------------------|----------------------|-------------|-------------|-------------|------|------------------|------------------|------------------------|-----------------------------------------------|---------------|----------|

CI: confidence interval; HR: hazard Ratio; OR: odds ratio; RR: risk ratio

## Explanations

a. Included trial(s) with hierarchical testing

b. CI shows both beneficial and detrimental effects

c. Small study (n=41)

# PubMed search strings

|                                                                                                   |                                                                                                                                                                                                                                                                                                                                                                                                                                                                                                                                                                                                                                                                                                                                                                                                                                                                                                                                                                                                                                                                                                                                                                                                                                                                                                                                                                                                                                          |
|---------------------------------------------------------------------------------------------------|------------------------------------------------------------------------------------------------------------------------------------------------------------------------------------------------------------------------------------------------------------------------------------------------------------------------------------------------------------------------------------------------------------------------------------------------------------------------------------------------------------------------------------------------------------------------------------------------------------------------------------------------------------------------------------------------------------------------------------------------------------------------------------------------------------------------------------------------------------------------------------------------------------------------------------------------------------------------------------------------------------------------------------------------------------------------------------------------------------------------------------------------------------------------------------------------------------------------------------------------------------------------------------------------------------------------------------------------------------------------------------------------------------------------------------------|
| Concept 1: COVID                                                                                  | ("COVID-19"[MeSH] OR nCoV[all] OR 2019nCoV[all] OR COVID[all] OR COVID19[all] OR "SARS-Cov-2"[MeSH] OR "severe acute respiratory syndrome coronavirus 2"[All] OR "sars cov 2"[All] OR SARS2[all] OR "sars coronavirus 2"[all] OR "cov 2"[all] OR cov2[all] OR ((wuhan[all] OR novel[all] OR 19[tiab] OR 2019[tiab] OR epidem*[tiab] OR epidemy[all] OR epidemic*[all] OR pandem*[all] OR outbreak[all] OR new[tiab]) AND ("coronavirus"[MeSH Terms] OR "Coronavirus Infections"[Mesh:NoExp] OR coronavirus*[all] OR corona-virus*[all] OR pneumonia-virus*[tiab] OR cov[tiab] OR hcov[tiab])) AND 2019/12[EDAT]:2030[EDAT])                                                                                                                                                                                                                                                                                                                                                                                                                                                                                                                                                                                                                                                                                                                                                                                                              |
| AND                                                                                               |                                                                                                                                                                                                                                                                                                                                                                                                                                                                                                                                                                                                                                                                                                                                                                                                                                                                                                                                                                                                                                                                                                                                                                                                                                                                                                                                                                                                                                          |
| Concept 2: RCT                                                                                    | ("Clinical Trial"[pt] OR placebo[tiab] OR "drug therapy"[sh] OR random*[tiab] OR RCT[tiab] OR trial[tiab] OR groups[tiab] OR "phase 1"[tiab] OR "phase 2"[tiab] OR "phase 3"[tiab] OR "phase 4"[tiab] OR "phase I"[tiab] OR "phase II"[tiab] OR "phase III"[tiab] OR "phase IV"[tiab] OR "clinical study"[tiab] OR "controlled study"[tiab] OR "controlled design"[tiab] OR multicenter[tiab] OR multicentre[tiab] OR "multi center"[tiab] OR "multi centre"[tiab] OR "open label"[tiab] OR "parallel group*" [tiab] OR "double blind*" [tiab] OR "single blind"[tiab] OR compare[ti] OR compared[ti] OR comparison[ti]) NOT ("Animals"[Mesh] NOT "Humans"[Mesh])                                                                                                                                                                                                                                                                                                                                                                                                                                                                                                                                                                                                                                                                                                                                                                        |
| AND                                                                                               |                                                                                                                                                                                                                                                                                                                                                                                                                                                                                                                                                                                                                                                                                                                                                                                                                                                                                                                                                                                                                                                                                                                                                                                                                                                                                                                                                                                                                                          |
| Concept 3: Anti-IL-1 therapy                                                                      | ("Interleukin 1 Receptor Antagonist Protein"[Mesh] OR "interleukin 1 receptor antagonist"[tiab] OR "IL 1 receptor antagonist"[tiab] OR "IL1 receptor antagonist"[tiab] OR "IL1 Febrile Inhibit*" [tiab] OR "IL 1 febrile inhibit*" [tiab] OR "interleukin 1 febrile inhibit*" [tiab] OR IL1Ra[tiab] OR "IL-1Ra"[tiab] OR "interleukin 1ra"[tiab] OR "IL1 Inhibit*" [tiab] OR "IL 1 Inhibit*" [tiab] OR "interleukin 1 Inhibit*" [tiab] OR antril[tiab] OR amtril[tiab] OR kineret[tiab] OR anakinra[tiab] OR "interleukin 1 receptor block*" [tiab] OR "IL 1 receptor block*" [tiab] OR "IL1 receptor block*" [tiab] OR "interleukin 1 antagonist"[tiab] OR "IL 1 antagonist"[tiab] OR "IL1 antagonist"[tiab])                                                                                                                                                                                                                                                                                                                                                                                                                                                                                                                                                                                                                                                                                                                           |
| Concept 4: Anti-IL-6 therapy                                                                      | ((("Interleukin-6"[Mesh] OR "IL-6"[tiab] OR IL6[tiab] OR "interleukin 6"[tiab] OR "BSF-2"[tiab] OR "Hybridoma Growth Factor"[tiab] OR "Plasmacytoma Growth Factor"[tiab] OR "Hepatocyte Stimulating Factor"[tiab] OR "MGI-2"[tiab] OR "Myeloid Differentiation-Inducing Protein"[tiab] OR "Myeloid Differentiation Inducing Protein"[tiab] OR "B Cell Differentiation Factor"[tiab] OR "Interferon beta 2"[tiab] OR "IFN-beta 2"[tiab] OR "IFN b 2"[tiab] OR "B Cell Stimulatory Factor 2"[tiab] OR "Receptors, Interleukin-6"[Mesh] OR "antigen cd126"[tiab] OR "cd126 antigen"[tiab] OR "IL6R"[tiab] OR "IL 6R"[tiab]) AND ("Antibodies, Monoclonal"[Mesh:NoExp] OR "Antibodies, Monoclonal, Humanized"[Mesh:NoExp] OR "Antibodies, Monoclonal, Murine-Derived"[Mesh:NoExp] OR antibod*[tiab] OR antagon*[tiab] OR inhibit*[tiab] OR block*[tiab])) OR "anti-interleukin-6"[tiab] OR "anti-IL-6"[tiab] OR "anti-IL6"[tiab] OR "tocilizumab" [Supplementary Concept] OR Tocilizumab[tiab] OR atlizumab[tiab] OR Actemra[tiab] OR Roactemra[tiab] OR luzinex[tiab] OR "sarilumab" [Supplementary Concept] OR sarilumab[tiab] OR kevzara[tiab] OR "regn 88"[tiab] OR regn88[tiab] OR "sar 153191"[tiab] OR sar153191[tiab] OR "siltuximab" [Supplementary Concept] OR Siltuximab[tiab] OR CLLB8[tiab] OR Sylvant[tiab] OR "CNTO-328"[tiab] OR CNTO328[tiab])                                                                              |
| Concept 5: Other monoclonal antibodies (COVID-19 concept incorporated – no need to add Concept 1) | ((("COVID-19"[MeSH] OR nCoV[all] OR 2019nCoV[all] OR COVID[all] OR COVID19[all] OR "SARS-Cov-2"[MeSH] OR "severe acute respiratory syndrome coronavirus 2"[All] OR "sars cov 2"[All] OR SARS2[all] OR "sars coronavirus 2"[all] OR "cov 2"[all] OR cov2[all] OR ((wuhan[all] OR novel[all] OR 19[tiab] OR 2019[tiab] OR epidem*[tiab] OR epidemy[all] OR epidemic*[all] OR pandem*[all] OR outbreak[all] OR new[tiab]) AND ("coronavirus"[MeSH Terms] OR "Coronavirus Infections"[Mesh:NoExp] OR coronavirus*[all] OR corona-virus*[all] OR pneumonia-virus*[tiab] OR cov[tiab] OR hcov[tiab])) AND ("Antibodies, Monoclonal"[Mesh:NoExp] OR "Antibodies, Monoclonal, Humanized"[Mesh:NoExp] OR "Antibodies, Monoclonal, Murine-Derived"[Mesh:NoExp] OR "monoclonal antibod*" [tiab] OR "humanized antibod*" [tiab] OR "humanised antibod*" [tiab])) OR "anti-HCoV-19"[tiab] OR "anti-nCoV-2019"[tiab] OR "anti-SARS-CoV-2"[tiab] OR "anti-SARS-CoV2"[tiab] OR "anti-SARS2"[tiab] OR "anti-severe acute respiratory syndrome coronavirus 2"[tiab] OR "COVID-19 virus antibod*" [tiab] OR "HCoV-19 antibod*" [tiab] OR "nCoV-2019 antibod*" [tiab] OR "SARS-CoV-2 antibod*" [tiab] OR "SARS2 antibod*" [tiab] OR "SARS2 virus antibod*" [tiab] OR "severe acute respiratory syndrome coronavirus 2 antibod*" [tiab] OR "bamlanivimab" [Supplementary Concept] OR Bamlanivimab[tiab] OR "LY-3819253"[tiab] OR "LY-COV555"[tiab] OR "LY COV |

|                              |                                                                                                                                                                                                                                                                                                                                                                                                                                                                                                                                                                                                                                                                                                                                                                                                                                                                                                                                                                                                                                                                                                                                                                                                                                                                                                                                                                                                                                                                                                                                                                                                                                                                                                                                                                                                                                                                                                                                                          |
|------------------------------|----------------------------------------------------------------------------------------------------------------------------------------------------------------------------------------------------------------------------------------------------------------------------------------------------------------------------------------------------------------------------------------------------------------------------------------------------------------------------------------------------------------------------------------------------------------------------------------------------------------------------------------------------------------------------------------------------------------------------------------------------------------------------------------------------------------------------------------------------------------------------------------------------------------------------------------------------------------------------------------------------------------------------------------------------------------------------------------------------------------------------------------------------------------------------------------------------------------------------------------------------------------------------------------------------------------------------------------------------------------------------------------------------------------------------------------------------------------------------------------------------------------------------------------------------------------------------------------------------------------------------------------------------------------------------------------------------------------------------------------------------------------------------------------------------------------------------------------------------------------------------------------------------------------------------------------------------------|
|                              | 555"[tiab] OR LYCOV555[tiab] OR LY3819253[tiab] OR "cilgavimab" [Supplementary Concept] OR Cilgavimab[tiab] OR "azd 1061"[tiab] OR "azd1061"[tiab] OR "cilgavimab and tixagevimab drug combination" [Supplementary Concept] OR AZD7442[tiab] OR "AZD 7442"[tiab] OR "bamlanivimab and etesevimab drug combination" [Supplementary Concept] OR "etesevimab" [Supplementary Concept] OR etesevimab[tiab] OR "LY CoV016"[tiab] OR "LY CoV 016"[tiab] OR "LYCoV016"[tiab] OR JS016"[tiab] OR JS 016"[tiab] OR "LY3832479"[tiab] OR "LY 3832479"[tiab] OR "cb 6"[tiab] OR "cb6"[tiab] OR "np 005"[tiab] OR "np005"[tiab] OR "sotrovimab" [Supplementary Concept] OR sotrovimab[tiab] OR "GSK-4182136"[tiab] OR GSK4182136[tiab] OR "VIR-7831"[tiab] OR "VIR7831"[tiab] OR "casirivimab" [Supplementary Concept] OR casirivimab[tiab] OR "REGN-10933"[tiab] OR "REGN10933"[tiab] OR "imdevimab" [Supplementary Concept] OR "imdevimab"[tiab] OR "REGN-10987"[tiab] OR "REGN10987"[tiab] OR "casirivimab and imdevimab drug combination" [Supplementary Concept] OR "REGN-COV"[tiab] OR "REGN-COV2"[tiab] OR "REGEN-COV"[tiab] OR "REGEN-COV2"[tiab] OR "regdanvimab" [Supplementary Concept] OR "regdanvimab"[tiab] OR "CT P59"[tiab] OR "CTP 59"[tiab] OR "CTP59"[tiab] OR "tixagevimab" [Supplementary Concept] OR "tixagevimab"[tiab] OR "azd 8895"[tiab] OR "azd8895"[tiab]) AND 2019/12[EDAT]:2030[EDAT])                                                                                                                                                                                                                                                                                                                                                                                                                                                                                                                                                 |
| Concept 6:<br>Azithromycin   | "Azithromycin"[Mesh] OR Azithromycin[tiab] OR Azythromycin[tiab] OR Sumamed[tiab] OR Toraseptol[tiab] OR Vinzam[tiab] OR "CP-62993"[tiab] OR CP62993[tiab] OR Zithromax[tiab] OR Azitrocin[tiab] OR Azadose[tiab] OR Ultreon[tiab] OR Zitromax[tiab] OR Goxal[tiab] OR Zentavion[tiab] OR Aruzilina[tiab] OR atizor[tiab] OR azasite[tiab] OR azatril[tiab] OR azenil[tiab] OR azibiot[tiab] OR azimin[tiab] OR azithral[tiab] OR Azitromax[tiab] OR azitromicin[tiab] OR azitromicina[tiab] OR aziwok[tiab] OR azomyne[tiab] OR aztrin[tiab] OR azydrop[tiab] OR azyter[tiab] OR bazyt[tiab] OR "cp 62933"[tiab] OR cp62933[tiab] OR forcin[tiab] OR inedol[tiab] OR infectoazit[tiab] OR "isv 401"[tiab] OR isv401[tiab] OR kromicin[tiab] OR macrozit[tiab] OR mezatrin[tiab] OR octavax[tiab] OR ordipha[tiab] OR ribotrex[tiab] OR sunamed[tiab] OR tobyl[tiab] OR tromix[tiab] OR trozocina[tiab] OR xithrone[tiab] OR "xz 450"[tiab] OR xz450[tiab] OR zaret[tiab] OR zarom[tiab] OR zetamax[tiab] OR zeto[tiab] OR zibramax[tiab] OR zifin[tiab] OR zimericina[tiab] OR zistic[tiab] OR zithrox[tiab] OR zitinn[tiab] OR zitrim[tiab] OR zitrobifan[tiab] OR zitrocin[tiab] OR zmax[tiab]                                                                                                                                                                                                                                                                                                                                                                                                                                                                                                                                                                                                                                                                                                                                                        |
| Concept 7:<br>Colchicine     | ("Colchicine"[Mesh] OR colchicin*[tiab] OR colchin*[tiab] OR colchichin*[tiab] OR colchily[tiab] OR colchimedio[tiab] OR colchiquim[tiab] OR colchisol[tiab] OR colchysat[tiab] OR colcin*[tiab] OR colcrys[tiab] OR colctab[tiab] OR colgout[tiab] OR colrefuz[tiab] OR gloperba[tiab] OR goutichin*[tiab] OR goutnil[tiab] OR kolkicin*[tiab] OR kolkisin*[tiab] OR mitigare[tiab] OR "mpc 004"[tiab] OR mpc004[tiab] OR "nsc 757"[tiab] OR nsc757[tiab] OR tolchicin*[tiab])                                                                                                                                                                                                                                                                                                                                                                                                                                                                                                                                                                                                                                                                                                                                                                                                                                                                                                                                                                                                                                                                                                                                                                                                                                                                                                                                                                                                                                                                          |
| Concept 8: JAK<br>inhibitors | ("Janus Kinase Inhibitors"[Mesh] OR "Janus Kinases/antagonists and inhibitors"[Mesh] OR "jak inhibit*"[tiab] OR "janus kinase inhibit*"[tiab] OR "janus tyrosine kinase inhibit*"[tiab] OR "jak 1 inhibit*"[tiab] OR "jak1 inhibit*"[tiab] OR "janus kinase 1 inhibit*"[tiab] OR "janus tyrosine kinase 1 inhibit*"[tiab] OR "jak 2 inhibit*"[tiab] OR "jak2 inhibit*"[tiab] OR "janus kinase 2 inhibit*"[tiab] OR "janus tyrosine kinase 2 inhibit*"[tiab] OR "janus kinase 1 2 inhibit*"[tiab] OR "janus tyrosine kinase 1 2 inhibit*"[tiab] OR "jak 3 inhibit*"[tiab] OR "jak3 inhibit*"[tiab] OR "janus kinase 3 inhibit*"[tiab] OR "janus tyrosine kinase 3 inhibit*"[tiab] OR jakinib*[tiab] OR "TYK2 inhibit*"[tiab] OR "TYK2 kinase inhibit*"[tiab] OR "tyrosine kinase 2 inhibit*"[tiab] OR "INCB018424" [Supplementary Concept] OR Ruxolitinib[tiab] OR "INCB-018424"[tiab] OR "INCB018424"[tiab] OR "INCB-18424"[tiab] OR "INCB18424"[tiab] OR INCA24[tiab] OR "INCA 24"[tiab] OR "inc 424"[tiab] OR inc424[tiab] OR "incb 424"[tiab] OR incb424[tiab] OR Jakafi[tiab] OR jakavi[tiab] OR deuruxolitinib[tiab] OR "baricitinib" [Supplementary Concept] OR Baricitinib[tiab] OR "INCB-28050"[tiab] OR "INCB28050"[tiab] OR "Olumiant"[tiab] OR "INCB028050"[tiab] OR "INCB-028050"[tiab] OR "LY3009104"[tiab] OR "LY-3009104"[tiab] OR Brepocitinib[tiab] OR "PF-06700841"[tiab] OR "PF06700841"[tiab] OR "delgocitinib" [Supplementary Concept] OR delgocitinib[tiab] OR "JTE-052"[tiab] OR JTE052[tiab] OR "leo 124249"[tiab] OR leo124249[tiab] OR Deucravacitinib[tiab] OR "bms 986165"[tiab] OR "bms 98616501"[tiab] OR bms986165[tiab] OR bms98616501[tiab] OR "tyk2-in-4"[tiab] OR "Fedratinib" [Supplementary Concept] OR fedratinib[tiab] OR TG101348[tiab] OR "TG 101348"[tiab] OR SAR302503[tiab] OR "SAR 302503"[tiab] OR Inrebic[tiab] OR Fosifidancitinib[tiab] OR "gusacitinib" [Supplementary Concept] OR "gusacitinib"[tiab] |

|                                |                                                                                                                                                                                                                                                                                                                                                                                                                                                                                                                                                                                                                                                                                                                                                                                                                                                                                                                                                                                                                                                                                                                                                                                                                                                                                                                                                                                                                                                                                                                                                                                                                                                                                                                                                                                                                                                                                                                                                                                                                                                                                                                                                                                                                                                                                                                                                                                                                                                                                                                                                                                                                                                                                                                                                                                      |
|--------------------------------|--------------------------------------------------------------------------------------------------------------------------------------------------------------------------------------------------------------------------------------------------------------------------------------------------------------------------------------------------------------------------------------------------------------------------------------------------------------------------------------------------------------------------------------------------------------------------------------------------------------------------------------------------------------------------------------------------------------------------------------------------------------------------------------------------------------------------------------------------------------------------------------------------------------------------------------------------------------------------------------------------------------------------------------------------------------------------------------------------------------------------------------------------------------------------------------------------------------------------------------------------------------------------------------------------------------------------------------------------------------------------------------------------------------------------------------------------------------------------------------------------------------------------------------------------------------------------------------------------------------------------------------------------------------------------------------------------------------------------------------------------------------------------------------------------------------------------------------------------------------------------------------------------------------------------------------------------------------------------------------------------------------------------------------------------------------------------------------------------------------------------------------------------------------------------------------------------------------------------------------------------------------------------------------------------------------------------------------------------------------------------------------------------------------------------------------------------------------------------------------------------------------------------------------------------------------------------------------------------------------------------------------------------------------------------------------------------------------------------------------------------------------------------------------|
|                                | OR "asn 002"[tiab] OR asn002[tiab] OR "en 3351"[tiab] OR "en3351"[tiab] OR Ilginatinib[tiab] OR "ns 018"[tiab] OR ns018[tiab] OR "itacitinib" [Supplementary Concept] OR "itacitinib"[tiab] OR "incb 039110"[tiab] OR "incb 39110"[tiab] OR incb039110[tiab] OR incb39110[tiab] OR "Izencitinib"[tiab] OR "jn3 8398"[tiab] OR jn38398[tiab] OR "td 1473"[tiab] OR td1473[tiab] OR "abrocitinib" [Supplementary Concept] OR abrocitinib[tiab] OR "pf 04965842"[tiab] OR "pf 4965842"[tiab] OR "pf04965842"[tiab] OR "pf4965842"[tiab] OR "GLPG0634" [Supplementary Concept] OR filgotinib[tiab] OR "g 146034"[tiab] OR "g146034"[tiab] OR "glpg 0634"[tiab] OR "glpg0634"[tiab] OR "gs 6034"[tiab] OR "gs6034"[tiab] OR "jyseleca"[tiab] OR "Lorpucitinib"[tiab] OR "N-(cyanomethyl)-4-(2-((4-(4-morpholinyl)phenyl)amino)-4-pyrimidinyl)benzamide" [Supplementary Concept] OR "cyt 387"[tiab] OR "cyt387"[tiab] OR "momelotinib"[tiab] OR "tofacinib" [Supplementary Concept] OR Tofacinib[tiab] OR "tasocitinib"[tiab] OR "Xeljanz"[tiab] OR "CP690 550"[tiab] OR "CP 690 550"[tiab] OR "CP690550"[tiab] OR "CP 690550"[tiab] OR Nezulcitinib[tiab] OR "TD 0903"[tiab] OR "R333" [Supplementary Concept] OR R333[tiab] OR "upadacitinib" [Supplementary Concept] OR upadacitinib[tiab] OR "ABT-494"[tiab] OR "ABT494"[tiab] OR Rinvoq[tiab])                                                                                                                                                                                                                                                                                                                                                                                                                                                                                                                                                                                                                                                                                                                                                                                                                                                                                                                                                                                                                                                                                                                                                                                                                                                                                                                                                                                                                                        |
| Concept 9: Convalescent plasma | ("COVID-19 serotherapy"[Supplementary Concept] OR serotherap*[tiab] OR "serum therap*[tiab] OR "convalescent serum"[tiab] OR "convalescent sera"[tiab] OR "hyperimmune globulin therap*[tiab] OR "convalescent plasma"[tiab] OR "Immunization, Passive"[Mesh] OR "passive immunization*[tiab] OR "passive immunisation*[tiab] OR "passive antibody transfer*[tiab] OR "passive transfer of immunity"[tiab] OR "passive immunotherapy*[tiab] OR "adoptive transfer*[tiab] OR "adoptive cell transfer*[tiab] OR "adoptive immunotherapy*[tiab] OR "adoptive cellular immunotherapy*[tiab] "convalescence phase plasma" [tiab] OR "convalescent human plasma" [tiab] OR "convalescent immune plasma"[tiab] OR "convalescent patient plasma"[tiab] OR "convalescent phase plasma"[tiab] OR "plasma from convalescent*" [tiab] OR "passive immune therap*[tiab] OR "passive immunity therap*[tiab] OR "passive immunization therap*[tiab] OR "passive immuno-therap*[tiab] OR "passive immunoglobulin therap*[tiab] OR "CP therap*[tiab] OR "CP immunotherapy*[tiab] OR "CP transfusion"[tiab] OR CPT[tiab] OR "passive immunity transfer"[tiab] OR "passively acquired immunity"[tiab] OR "passive immunity"[tiab] OR "adoptive immunisation"[tiab] OR "adoptive immunization"[tiab] OR "plasma transfusion*[tiab] OR "plasma infusion*[tiab] OR "serum transfusion*[tiab] OR "serum infusion*[tiab] OR "CP transfusion*[tiab] OR CPT[tiab])                                                                                                                                                                                                                                                                                                                                                                                                                                                                                                                                                                                                                                                                                                                                                                                                                                                                                                                                                                                                                                                                                                                                                                                                                                                                                                                                             |
| Concept 10: Anti-coagulation   | "Heparin, Low-Molecular-Weight"[Mesh] OR heparin*[tiab] OR LMWH[tiab] OR dalteparin*[tiab] OR tedelparin*[tiab] OR FR-860[tiab] OR FR860[tiab] OR Kabi-2165[tiab] OR Kabi2165[tiab] OR fragmin*[tiab] OR enoxaparin*[tiab] OR PK-10-169[tiab] OR PK-10169[tiab] OR PK10169[tiab] OR EMT-967[tiab] OR lovenox[tiab] OR clexan*[tiab] OR EMT-966[tiab] OR nadroparin*[tiab] OR fraxiparin*[tiab] OR CY-216[tiab] OR CY216[tiab] OR Tinzaparin*[tiab] OR 3-phenyl-2-propenoic-acid[tiab] OR innohep[tiab] OR "Anticoagulants" [Pharmacological Action] OR anticoagula*[tiab] OR "anti coagula*[tiab] OR "Anticoagulants"[Mesh:NoExp] OR bm-2123[tiab] OR bm2123[tiab] OR choay[tiab] OR ebpm*[tiab] OR ff1034[tiab] OR ff-1034[tiab] OR gag-869[tiab] OR gag869[tiab] OR pk-007[tiab] OR pk007[tiab] OR "sandoz 5100"[tiab] OR "sandoz 6700"[tiab] OR traxyparin*[tiab] OR ademiparin*[tiab] OR m118[tiab] OR m-118[tiab] OR antixarin*[tiab] OR ardeparin*[tiab] OR normifio[tiab] OR normiflo[tiab] OR wy-90493[tiab] OR wy90493[tiab] OR bemiparin*[tiab] OR entervit[tiab] OR hepadren*[tiab] OR hibor[tiab] OR ivor[tiab] OR ivorat[tiab] OR ivormax[tiab] OR phivor[tiab] OR zibor[tiab] OR certoparin*[tiab] OR arteven[tiab] OR badyket[tiab] OR "einecs 232-681-7"[tiab] OR eparina[tiab] OR "mono embolox"[tiab] OR monoembolox[tiab] OR op-622[tiab] OR op622[tiab] OR op-386[tiab] OR op386[tiab] OR pabyrin*[tiab] OR pulari[tiab] OR sandoparin*[tiab] OR sublingula[tiab] OR troparin*[tiab] OR "vitrum a"[tiab] OR cy-222[tiab] OR cy222[tiab] OR k-2165[tiab] OR k2165[tiab] OR "low liquemin*[tiab] OR danaparoid[tiab] OR danaproid[tiab] OR kb-101[tiab] OR kb101[tiab] OR lomoparin[tiab] OR lomoparin*[tiab] OR mucoglucuronan[tiab] OR org-10172[tiab] OR org10172[tiab] OR orgaran[tiab] OR deligoparin*[tiab] OR op-2000[tiab] OR op2000[tiab] OR embolox[tiab] OR inhixa[tiab] OR klexane[tiab] OR ledraxen[tiab] OR neoparin*[tiab] OR "qualiop klinik"[tiab] OR thorinane[tiab] OR fondoparin*[tiab] OR arixtra[tiab] OR ic-851589[tiab] OR ic851589[tiab] OR org-31540[tiab] OR org31540[tiab] OR quixidar[tiab] OR sr-90107[tiab] OR sr-90107a[tiab] OR sr90107[tiab] OR sr90107a[tiab] OR idrabiotaparin[tiab] OR ssr-126517[tiab] OR ssr-126517-e[tiab] OR ssr126517[tiab] OR ssr126517e[tiab] OR idraparin[tiab] OR org-34006[tiab] OR org34006[tiab] OR "sanorg 34006"[tiab] OR sanorg34006[tiab] OR sr-34006[tiab] OR sr34006[tiab] OR "livaraparin calcium"[tiab] OR minolteparin*[tiab] OR cy-216d[tiab] OR cy216d[tiab] OR fraxodi[tiab] OR seledie[tiab] OR seleparin*[tiab] OR tedegliparin*[tiab] OR necuparanib[tiab] OR df-01[tiab] OR df01[tiab] OR m-402[tiab] OR m402[tiab] OR tafoxiparin*[tiab] OR parnaparin*[tiab] OR fluxum[tiab] OR |

|                         |                                                                                                                                                                                                                                                                                                                                                                                                                                                                                                                                                                                                                                                                                                                                                                                                                                                                                                                                                                                                                                                                                                                                                                                                                                                                                                                                                                                                                                                                                                                                                                                                                                                                                                               |
|-------------------------|---------------------------------------------------------------------------------------------------------------------------------------------------------------------------------------------------------------------------------------------------------------------------------------------------------------------------------------------------------------------------------------------------------------------------------------------------------------------------------------------------------------------------------------------------------------------------------------------------------------------------------------------------------------------------------------------------------------------------------------------------------------------------------------------------------------------------------------------------------------------------------------------------------------------------------------------------------------------------------------------------------------------------------------------------------------------------------------------------------------------------------------------------------------------------------------------------------------------------------------------------------------------------------------------------------------------------------------------------------------------------------------------------------------------------------------------------------------------------------------------------------------------------------------------------------------------------------------------------------------------------------------------------------------------------------------------------------------|
|                         | lohepa[tiab] OR lowhepa[tiab] OR minidaltan[tiab] OR op-2123[tiab] OR op2123[tiab] OR parvoparin*[tiab] OR rd-11885[tiab] OR rd11885[tiab] OR reviparin*[tiab] OR clivarin*[tiab] OR clivarodi[tiab] OR lomorin*[tiab] OR lu-47311[tiab] OR lu47311[tiab] OR semuloparin*[tiab] OR ave-5026[tiab] OR ave5026[tiab] OR mulsevo[tiab] OR visamerin*[tiab] OR sevuparin*[tiab] OR lhn1[tiab] OR lhn-1[tiab] OR logiparin*[tiab]                                                                                                                                                                                                                                                                                                                                                                                                                                                                                                                                                                                                                                                                                                                                                                                                                                                                                                                                                                                                                                                                                                                                                                                                                                                                                  |
| Concept 11: Ventilation | "Continuous Positive Airway Pressure"[Mesh] OR "continuous positive airway pressure"[tiab] OR CPAP[tiab] OR nCPAP[tiab] OR "airway pressure release ventilation"[tiab] OR APRV[tiab] OR "positive end expiratory pressure"[tiab] OR "constant positive pressure breathing"[tiab] OR "continuous positive airway pressure"[tiab] OR "continuous positive pressure breathing"[tiab] OR cppb[tiab] OR cppv[tiab] OR "hyperbaric respiration"[tiab] OR (hyperbaric[tiab] AND ventilation[tiab]) OR "hyperbaric oxygenation"[tiab] OR PEEP[tiab] OR "positive end expiratory pressure breathing"[tiab] OR HFNC[tiab] OR "high flow nasal cannula"[tiab] OR "Oxygen Inhalation Therapy"[Mesh] OR "oxygen inhalation"[tiab] OR "HF oxygen*"[tiab] OR HFNCT[tiab] OR "high flow nasal prong"[tiab] OR "high flow nasal therap*"[tiab] OR "high flow oxygen*"[tiab] OR "highflow nasal cannula"[tiab] OR "highflow nasal prong"[tiab] OR "highflow nasal therap*"[tiab] OR "highflow oxygen*"[tiab] OR "HFHHNC ventilation"[tiab] OR HHFNC[tiab] OR "high flow high humidity nasal cannula"[tiab] OR "high flow humidified nasal cannula"[tiab] OR "humidified high flow cannula"[tiab] OR "humidified high flow nasal cannula"[tiab] OR "highflow high humidity nasal cannula"[tiab] OR "highflow humidified nasal cannula"[tiab] OR "humidified highflow cannula"[tiab] OR "humidified highflow nasal cannula"[tiab] OR THRIVE[tiab] OR "transnasal humidified rapid insufflation ventilatory exchange"[tiab] OR "trans-nasal humidified rapid insufflation ventilatory exchange"[tiab] OR "trans-nasal rapid insufflation ventilatory exchange"[tiab] OR "transnasal rapid insufflation ventilatory exchange"[tiab] |

## EMBASE search strings

|                              |                                                                                                                                                                                                                                                                                                                                                                                                                                                                                                                                                                                                                                                                                                                                                                                                                 |
|------------------------------|-----------------------------------------------------------------------------------------------------------------------------------------------------------------------------------------------------------------------------------------------------------------------------------------------------------------------------------------------------------------------------------------------------------------------------------------------------------------------------------------------------------------------------------------------------------------------------------------------------------------------------------------------------------------------------------------------------------------------------------------------------------------------------------------------------------------|
| Concept 1: COVID             | ((('coronavirus disease 2019'/exp OR ncov:ti,ab,kw,ff OR 2019ncov:ti,ab,kw,ff OR covid:ti,ab,kw,ff OR covid19:ti,ab,kw,ff OR 'severe acute respiratory syndrome coronavirus 2'/exp OR 'severe acute respiratory syndrome coronavirus 2':ti,ab,kw,ff OR 'sars cov 2':ti,ab,kw,ff OR sars2:ti,ab,kw,ff OR 'sars coronavirus 2':ti,ab,kw,ff OR 'cov 2':ti,ab,kw,ff OR cov2:ti,ab,kw,ff OR ((wuhan:ti,ab,kw,ad,ff OR novel:ti,ab,kw,ff OR 19:ti,ab,kw OR 2019:ti,ab,kw OR epidem*:ti,ab,kw OR epidemy:ti,ab,kw,ff OR epidemic*:ti,ab,kw,ff OR pandem*:ti,ab,kw,ff OR outbreak:ti,ab,kw,ff OR new:ti,ab,kw) AND ('coronavirinae'/exp OR 'coronavirus infection'/de OR coronavirus*:ti,ab,kw,ff OR 'corona virus*':ti,ab,kw,ff OR 'pneumonia virus*':ti,ab,kw OR cov:ti,ab,kw OR hcov:ti,ab,kw))) AND [2019-2022]/py) |
| AND                          |                                                                                                                                                                                                                                                                                                                                                                                                                                                                                                                                                                                                                                                                                                                                                                                                                 |
| Concept 2: RCT               | ((('clinical trial'/exp OR placebo:ti,ab,kw OR random*:ti,ab,kw OR trial:ti,ab,kw OR groups:ti,ab,kw OR 'phase 1':ti,ab,kw OR 'phase 2':ti,ab,kw OR 'phase 3':ti,ab,kw OR 'phase 4':ti,ab,kw OR 'phase I':ti,ab,kw OR 'phase II':ti,ab,kw OR 'phase III':ti,ab,kw OR 'phase IV':ti,ab,kw OR 'clinical study':ti,ab,kw OR 'controlled study':ti,ab,kw OR 'controlled design':ti,ab,kw OR multicenter:ti,ab,kw OR multicentre:ti,ab,kw OR 'multi center':ti,ab,kw OR 'multi centre':ti,ab,kw OR 'open label':ti,ab,kw OR 'parallel group*':ti,ab,kw OR 'double blind*':ti,ab,kw OR 'single blind*':ti,ab,kw OR compare:ti OR compared:ti OR comparison:ti) NOT 'conference abstract':it)                                                                                                                          |
| AND                          |                                                                                                                                                                                                                                                                                                                                                                                                                                                                                                                                                                                                                                                                                                                                                                                                                 |
| Concept 3: Anti-IL-1 therapy | ('anakinra'/exp OR anakinra:ti,ab,kw OR kineret:ti,ab,kw OR 'interleukin 1 receptor antagonist':ti,ab,kw OR 'IL 1 receptor antagonist':ti,ab,kw OR 'IL1 receptor antagonist':ti,ab,kw OR 'interleukin 1 receptor block*':ti,ab,kw OR 'IL 1 receptor block*':ti,ab,kw OR 'IL1 receptor block*':ti,ab,kw OR 'interleukin 1 receptor blocking agent'/exp OR amtril:ti,ab,kw OR antril:ti,ab,kw OR 'il 1ra':ti,ab,kw OR 'il1ra':ti,ab,kw OR 'interleukin 1 antagonist':ti,ab,kw OR 'IL 1 antagonist':ti,ab,kw OR 'IL1 antagonist':ti,ab,kw OR 'interleukin 1ra':ti,ab,kw OR 'IL1 Febrile Inhibit*':ti,ab,kw OR 'IL 1                                                                                                                                                                                                |

|                                        |                                                                                                                                                                                                                                                                                                                                                                                                                                                                                                                                                                                                                                                                                                                                                                                                                                                                                                                                                                                                                                                                                                                                                                                                                                                                                                                                                                                                                                                                                                                                                                                                                                                                                                                                                                                                                                                                                                                                                                                                                                                                                                                                                                                                                                                                                                                                                                                                                                                                                                                                      |
|----------------------------------------|--------------------------------------------------------------------------------------------------------------------------------------------------------------------------------------------------------------------------------------------------------------------------------------------------------------------------------------------------------------------------------------------------------------------------------------------------------------------------------------------------------------------------------------------------------------------------------------------------------------------------------------------------------------------------------------------------------------------------------------------------------------------------------------------------------------------------------------------------------------------------------------------------------------------------------------------------------------------------------------------------------------------------------------------------------------------------------------------------------------------------------------------------------------------------------------------------------------------------------------------------------------------------------------------------------------------------------------------------------------------------------------------------------------------------------------------------------------------------------------------------------------------------------------------------------------------------------------------------------------------------------------------------------------------------------------------------------------------------------------------------------------------------------------------------------------------------------------------------------------------------------------------------------------------------------------------------------------------------------------------------------------------------------------------------------------------------------------------------------------------------------------------------------------------------------------------------------------------------------------------------------------------------------------------------------------------------------------------------------------------------------------------------------------------------------------------------------------------------------------------------------------------------------------|
|                                        | febrile inhibit*:ti,ab,kw OR 'interleukin 1 febrile inhibit*:ti,ab,kw OR 'interleukin 1ra':ti,ab,kw OR 'IL1 Inhibit*:ti,ab,kw OR 'IL 1 Inhibit*:ti,ab,kw OR 'interleukin 1 Inhibit*:ti,ab,kw)                                                                                                                                                                                                                                                                                                                                                                                                                                                                                                                                                                                                                                                                                                                                                                                                                                                                                                                                                                                                                                                                                                                                                                                                                                                                                                                                                                                                                                                                                                                                                                                                                                                                                                                                                                                                                                                                                                                                                                                                                                                                                                                                                                                                                                                                                                                                        |
| Concept 4: Anti-IL-6 therapy           | ((('interleukin 6'/exp OR 'IL-6':ti,ab,kw OR IL6:ti,ab,kw OR 'interleukin 6':ti,ab,kw OR 'BSF-2':ti,ab,kw OR 'Hybridoma Growth Factor':ti,ab,kw OR 'Plasmacytoma Growth Factor':ti,ab,kw OR 'Hepatocyte Stimulating Factor':ti,ab,kw OR 'MGI-2':ti,ab,kw OR 'Myeloid Differentiation-Inducing Protein':ti,ab,kw OR 'Myeloid Differentiation Inducing Protein':ti,ab,kw OR 'B Cell Differentiation Factor':ti,ab,kw OR 'Interferon beta 2':ti,ab,kw OR 'IFN-beta 2':ti,ab,kw OR 'IFN b 2':ti,ab,kw OR 'B Cell Stimulatory Factor 2':ti,ab,kw OR 'interleukin 6 receptor'/exp OR 'antigen cd126':ti,ab,kw OR 'cd126 antigen':ti,ab,kw OR 'IL6R':ti,ab,kw OR 'IL 6R':ti,ab,kw) AND ('monoclonal antibody'/de OR 'human monoclonal antibody'/exp OR antibod*:ti,ab,kw OR antagon*:ti,ab,kw OR inhibit*:ti,ab,kw OR block*:ti,ab,kw)) OR 'interleukin 6 antibody'/exp OR 'anti-interleukin-6':ti,ab,kw OR 'anti-IL-6':ti,ab,kw OR 'anti-IL6':ti,ab,kw OR 'tocilizumab'/exp OR Tocilizumab:ti,ab,kw OR atlizumab:ti,ab,kw OR Actemra:ti,ab,kw OR Roactemra:ti,ab,kw OR luzinex:ti,ab,kw OR 'sarilumab'/exp OR sarilumab:ti,ab,kw OR kevsara:ti,ab,kw OR 'regn 88':ti,ab,kw OR regn88:ti,ab,kw OR 'sar 153191':ti,ab,kw OR sar153191:ti,ab,kw OR 'siltuximab'/exp OR Siltuximab:ti,ab,kw OR CLLB8:ti,ab,kw OR Sylvant:ti,ab,kw OR 'CNTO 328':ti,ab,kw OR CNTO328:ti,ab,kw)                                                                                                                                                                                                                                                                                                                                                                                                                                                                                                                                                                                                                                                                                                                                                                                                                                                                                                                                                                                                                                                                                                                                                                  |
| Concept 5: Other monoclonal antibodies | ((('coronavirus disease 2019'/exp OR nCoV:ti,ab,kw,ff OR 2019nCoV:ti,ab,kw,ff OR COVID:ti,ab,kw,ff OR COVID19:ti,ab,kw,ff OR 'Severe acute respiratory syndrome coronavirus 2'/exp OR 'severe acute respiratory syndrome coronavirus 2':ti,ab,kw,ff OR 'sars cov 2':ti,ab,kw,ff OR SARS2:ti,ab,kw,ff OR 'sars coronavirus 2':ti,ab,kw,ff OR 'cov 2':ti,ab,kw,ff OR cov2:ti,ab,kw,ff OR ((wuhan:ti,ab,kw,ad,ff OR novel:ti,ab,kw,ff OR 19:ti,ab,kw OR 2019:ti,ab,kw OR epidem*:ti,ab,kw OR epidemic:ti,ab,kw,ff OR epidemic*:ti,ab,kw,ff OR pandem*:ti,ab,kw,ff OR outbreak:ti,ab,kw,ff OR new:ti,ab,kw) AND ('Coronavirinae'/exp OR 'Coronavirus infection'/de OR coronavirus*:ti,ab,kw,ff OR 'corona virus*:ti,ab,kw,ff OR 'pneumonia virus*:ti,ab,kw OR cov:ti,ab,kw OR hcov:ti,ab,kw))) AND ('monoclonal antibody'/de OR 'human monoclonal antibody'/exp OR 'monoclonal antibod*:ti,ab,kw OR 'humanized antibod*:ti,ab,kw OR 'humanised antibod*:ti,ab,kw)) OR 'SARS-CoV-2 antibody'/exp OR 'anti-HCoV-19':ti,ab,kw OR 'anti-nCoV-2019':ti,ab,kw OR 'anti-SARS-CoV-2':ti,ab,kw OR 'anti-SARS-CoV2':ti,ab,kw OR 'anti-SARS2':ti,ab,kw OR 'anti-severe acute respiratory syndrome coronavirus 2':ti,ab,kw OR 'COVID-19 virus antibod*:ti,ab,kw OR 'HCoV-19 antibod*:ti,ab,kw OR 'nCoV-2019 antibod*:ti,ab,kw OR 'SARS-CoV-2 antibod*:ti,ab,kw OR 'SARS2 antibod*:ti,ab,kw OR 'SARS2 virus antibod*:ti,ab,kw OR 'severe acute respiratory syndrome coronavirus 2 antibod*:ti,ab,kw OR Bamlanivimab:ti,ab,kw OR 'LY-3819253':ti,ab,kw OR 'LY COV555':ti,ab,kw OR 'LY COV 555':ti,ab,kw OR LYCOV555:ti,ab,kw OR LY3819253:ti,ab,kw OR Cilgavimab:ti,ab,kw OR 'azd 1061':ti,ab,kw OR azd1061:ti,ab,kw OR etesevimab:ti,ab,kw OR 'LY CoV016':ti,ab,kw OR 'LY CoV 016':ti,ab,kw OR 'LYCoV016':ti,ab,kw OR 'JS016':ti,ab,kw OR 'JS 016':ti,ab,kw OR 'LY3832479':ti,ab,kw OR 'LY 3832479':ti,ab,kw OR 'cb 6':ti,ab,kw OR 'cb6':ti,ab,kw OR 'np 005':ti,ab,kw OR 'np005':ti,ab,kw OR sotrovimab:ti,ab,kw OR 'GSK 4182136':ti,ab,kw OR GSK4182136:ti,ab,kw OR 'VIR 7831':ti,ab,kw OR 'VIR7831':ti,ab,kw OR casirivimab:ti,ab,kw OR 'REGN-10933':ti,ab,kw OR 'REGN10933':ti,ab,kw OR 'imdevimab':ti,ab,kw OR 'REGN 10987':ti,ab,kw OR 'REGN10987':ti,ab,kw OR 'REGN-COV':ti,ab,kw OR 'REGN-COV2':ti,ab,kw OR 'REGEN-COV':ti,ab,kw OR 'REGEN-COV2':ti,ab,kw OR 'regdanvimab':ti,ab,kw OR 'CT P59':ti,ab,kw OR 'CTP 59':ti,ab,kw OR 'CTP59':ti,ab,kw OR 'tixagevimab':ti,ab,kw OR 'azd 8895':ti,ab,kw OR 'azd8895':ti,ab,kw) AND [2019-2022]/py) |
| Concept 6: Azithromycin                | 'azithromycin'/exp OR Azithromycin:ti,ab,kw OR Azythromycin:ti,ab,kw OR Sumamed:ti,ab,kw OR Toraseptol:ti,ab,kw OR Vinzam:ti,ab,kw OR 'CP 62993':ti,ab,kw OR CP62993:ti,ab,kw OR Zithromax:ti,ab,kw OR Azitrocin:ti,ab,kw OR Azadose:ti,ab,kw OR Ultreon:ti,ab,kw OR Zitromax:ti,ab,kw OR Goxal:ti,ab,kw OR Zentavion:ti,ab,kw OR Aruzilina:ti,ab,kw OR atizor:ti,ab,kw OR azasite:ti,ab,kw OR azatril:ti,ab,kw OR azenil:ti,ab,kw OR azibiot:ti,ab,kw OR azimin:ti,ab,kw OR azithral:ti,ab,kw OR Azitromax:ti,ab,kw OR azitromicin:ti,ab,kw OR azitromicina:ti,ab,kw OR aziwok:ti,ab,kw OR azomyne:ti,ab,kw OR aztrin:ti,ab,kw OR azydrop:ti,ab,kw OR azyter:ti,ab,kw OR bazyt:ti,ab,kw OR 'cp 62933':ti,ab,kw OR cp62933:ti,ab,kw OR forcin:ti,ab,kw OR inedol:ti,ab,kw OR infectoazit:ti,ab,kw OR 'isv 401':ti,ab,kw OR isv401:ti,ab,kw OR kromicin:ti,ab,kw OR macrozit:ti,ab,kw OR mezatrin:ti,ab,kw OR octavax:ti,ab,kw OR ordipha:ti,ab,kw OR ribotrex:ti,ab,kw OR sunamed:ti,ab,kw OR tobyl:ti,ab,kw OR tromix:ti,ab,kw OR trozocina:ti,ab,kw OR xithrone:ti,ab,kw OR 'xz 450':ti,ab,kw OR xz450:ti,ab,kw OR zaret:ti,ab,kw OR zarom:ti,ab,kw OR zetamax:ti,ab,kw OR zeto:ti,ab,kw OR zibramax:ti,ab,kw OR zifin:ti,ab,kw OR zimericina:ti,ab,kw OR zistic:ti,ab,kw OR zithrox:ti,ab,kw OR zitinn:ti,ab,kw OR zitrim:ti,ab,kw OR zitrobifan:ti,ab,kw OR zitrocin:ti,ab,kw OR zmax:ti,ab,kw                                                                                                                                                                                                                                                                                                                                                                                                                                                                                                                                                                                                                                                                                                                                                                                                                                                                                                                                                                                                                                                                                                                                   |

|                                   |                                                                                                                                                                                                                                                                                                                                                                                                                                                                                                                                                                                                                                                                                                                                                                                                                                                                                                                                                                                                                                                                                                                                                                                                                                                                                                                                                                                                                                                                                                                                                                                                                                                                                                                                                                                                                                                                                                                                                                                                                                                                                                                                                                                                                                                                                                                                                                                                                                                                                                                                                                                                                                                                                                                                                                                                                                                                                                                                                                                                                                                                                                                                                       |
|-----------------------------------|-------------------------------------------------------------------------------------------------------------------------------------------------------------------------------------------------------------------------------------------------------------------------------------------------------------------------------------------------------------------------------------------------------------------------------------------------------------------------------------------------------------------------------------------------------------------------------------------------------------------------------------------------------------------------------------------------------------------------------------------------------------------------------------------------------------------------------------------------------------------------------------------------------------------------------------------------------------------------------------------------------------------------------------------------------------------------------------------------------------------------------------------------------------------------------------------------------------------------------------------------------------------------------------------------------------------------------------------------------------------------------------------------------------------------------------------------------------------------------------------------------------------------------------------------------------------------------------------------------------------------------------------------------------------------------------------------------------------------------------------------------------------------------------------------------------------------------------------------------------------------------------------------------------------------------------------------------------------------------------------------------------------------------------------------------------------------------------------------------------------------------------------------------------------------------------------------------------------------------------------------------------------------------------------------------------------------------------------------------------------------------------------------------------------------------------------------------------------------------------------------------------------------------------------------------------------------------------------------------------------------------------------------------------------------------------------------------------------------------------------------------------------------------------------------------------------------------------------------------------------------------------------------------------------------------------------------------------------------------------------------------------------------------------------------------------------------------------------------------------------------------------------------------|
| Concept 7:<br>Colchicine          | ('colchicine'/exp OR colchicin*:ti,ab,kw OR colchin*:ti,ab,kw OR colchichin*:ti,ab,kw OR colchily*:ti,ab,kw OR colchimedio*:ti,ab,kw OR colchiquim*:ti,ab,kw OR colchisol*:ti,ab,kw OR colchysat*:ti,ab,kw OR colcin*:ti,ab,kw OR colcrys*:ti,ab,kw OR colctab*:ti,ab,kw OR colgout*:ti,ab,kw OR colrefuz*:ti,ab,kw OR gloperba*:ti,ab,kw OR goutichin*:ti,ab,kw OR goutnil*:ti,ab,kw OR kolkicin*:ti,ab,kw OR kolkisin*:ti,ab,kw OR mitigare*:ti,ab,kw OR 'mpc 004':ti,ab,kw OR mpc004*:ti,ab,kw OR 'nsc 757':ti,ab,kw OR nsc757*:ti,ab,kw OR tolchicin*:ti,ab,kw)                                                                                                                                                                                                                                                                                                                                                                                                                                                                                                                                                                                                                                                                                                                                                                                                                                                                                                                                                                                                                                                                                                                                                                                                                                                                                                                                                                                                                                                                                                                                                                                                                                                                                                                                                                                                                                                                                                                                                                                                                                                                                                                                                                                                                                                                                                                                                                                                                                                                                                                                                                                   |
| Concept 8: JAK inhibitors         | ('Janus kinase inhibitor'/exp OR 'jak inhibit*':ti,ab,kw OR 'janus kinase inhibit*':ti,ab,kw OR 'janus tyrosine kinase inhibit*':ti,ab,kw OR 'jak 1 inhibit*':ti,ab,kw OR 'jak1 inhibit*':ti,ab,kw OR 'janus kinase 1 inhibit*':ti,ab,kw OR 'janus tyrosine kinase 1 inhibit*':ti,ab,kw OR 'jak 2 inhibit*':ti,ab,kw OR 'jak2 inhibit*':ti,ab,kw OR 'janus kinase 2 inhibit*':ti,ab,kw OR 'janus tyrosine kinase 2 inhibit*':ti,ab,kw OR 'jak 1 2 inhibit*':ti,ab,kw OR 'jak1 2 inhibit*':ti,ab,kw OR 'janus kinase 1 2 inhibit*':ti,ab,kw OR 'janus tyrosine kinase 1 2 inhibit*':ti,ab,kw OR 'jak 3 inhibit*':ti,ab,kw OR 'jak3 inhibit*':ti,ab,kw OR 'janus kinase 3 inhibit*':ti,ab,kw OR 'janus tyrosine kinase 3 inhibit*':ti,ab,kw OR jakinib*:ti,ab,kw OR 'TYK2 inhibit*':ti,ab,kw OR 'TYK2 kinase inhibit*':ti,ab,kw OR 'tyrosine kinase 2 inhibit*':ti,ab,kw OR Ruxolitinib*:ti,ab,kw OR 'INCB-018424':ti,ab,kw OR 'INCB018424':ti,ab,kw OR 'INCB-18424':ti,ab,kw OR 'INCB18424':ti,ab,kw OR 'INCA24':ti,ab,kw OR 'INCA 24':ti,ab,kw OR 'inc 424':ti,ab,kw OR 'inc424':ti,ab,kw OR 'incb 424':ti,ab,kw OR 'incb424':ti,ab,kw OR Jakafi*:ti,ab,kw OR jakavi*:ti,ab,kw OR deuruxolitinib*:ti,ab,kw OR Baricitinib*:ti,ab,kw OR 'INCB-28050':ti,ab,kw OR 'INCB28050':ti,ab,kw OR 'Olumiant':ti,ab,kw OR 'INCB028050':ti,ab,kw OR 'INCB-028050':ti,ab,kw OR 'LY3009104':ti,ab,kw OR 'LY-3009104':ti,ab,kw OR Brepocitinib*:ti,ab,kw OR 'PF-06700841':ti,ab,kw OR 'PF06700841':ti,ab,kw OR Delgocitinib*:ti,ab,kw OR 'JTE 052':ti,ab,kw OR 'JTE052':ti,ab,kw OR 'leo 124249':ti,ab,kw OR 'leo124249':ti,ab,kw OR Deucravacitinib*:ti,ab,kw OR 'bms 986165':ti,ab,kw OR 'bms 98616501':ti,ab,kw OR 'bms986165':ti,ab,kw OR 'bms98616501':ti,ab,kw OR 'tyk2-in-4':ti,ab,kw OR fedratinib*:ti,ab,kw OR 'TG101348':ti,ab,kw OR 'TG 101348':ti,ab,kw OR 'SAR302503':ti,ab,kw OR 'SAR 302503':ti,ab,kw OR Inrebic*:ti,ab,kw OR fosifidancitinib*:ti,ab,kw OR 'gusacitinib':ti,ab,kw OR 'asn 002':ti,ab,kw OR 'asn002':ti,ab,kw OR 'en 3351':ti,ab,kw OR 'en3351':ti,ab,kw OR Ilginatinib*:ti,ab,kw OR 'ns 018':ti,ab,kw OR 'ns018':ti,ab,kw OR 'itacitinib':ti,ab,kw OR 'incb 039110':ti,ab,kw OR 'incb 39110':ti,ab,kw OR 'incb039110':ti,ab,kw OR 'incb39110':ti,ab,kw OR 'Izencitinib':ti,ab,kw OR 'jnj 8398':ti,ab,kw OR 'jnj8398':ti,ab,kw OR 'td 1473':ti,ab,kw OR 'td1473':ti,ab,kw OR abrocitinib*:ti,ab,kw OR 'pf 04965842':ti,ab,kw OR 'pf 4965842':ti,ab,kw OR 'pf04965842':ti,ab,kw OR 'pf4965842':ti,ab,kw OR 'filgotinib':ti,ab,kw OR 'g 146034':ti,ab,kw OR 'g146034':ti,ab,kw OR 'glpg 0634':ti,ab,kw OR 'glpg0634':ti,ab,kw OR 'gs 6034':ti,ab,kw OR 'gs6034':ti,ab,kw OR 'jyseleca':ti,ab,kw OR 'lorpucitinib':ti,ab,kw OR 'cyt 387':ti,ab,kw OR 'cyt387':ti,ab,kw OR 'momelotinib':ti,ab,kw OR Tofacitinib*:ti,ab,kw OR 'tasocitinib':ti,ab,kw OR 'Xeljanz':ti,ab,kw OR 'CP690 550':ti,ab,kw OR 'CP 690 550':ti,ab,kw OR 'CP690550':ti,ab,kw OR 'CP 690550':ti,ab,kw OR 'Nezulcitinib':ti,ab,kw OR 'TD 0903':ti,ab,kw OR 'R333':ti,ab,kw OR 'upadacitinib':ti,ab,kw OR 'ABT494':ti,ab,kw OR 'ABT-494':ti,ab,kw OR Rinvoq*:ti,ab,kw) |
| Concept 9:<br>Convalescent plasma | ('convalescent plasma'/exp OR 'convalescent plasma':ti,ab,kw OR 'convalescence phase plasma':ti,ab,kw OR 'convalescent human plasma':ti,ab,kw OR 'convalescent immune plasma':ti,ab,kw OR 'convalescent patient plasma':ti,ab,kw OR 'convalescent phase plasma':ti,ab,kw OR 'plasma from convalescent*':ti,ab,kw OR 'passive immunotherapy'/exp OR 'passive immunotherap*':ti,ab,kw OR 'passive immune therap*':ti,ab,kw OR 'passive immunity therap*':ti,ab,kw OR 'passive immunization therap*':ti,ab,kw OR 'passive immuno-therap*':ti,ab,kw OR 'passive immunoglobulin therap*':ti,ab,kw OR 'CP therap*':ti,ab,kw OR 'CP immunotherap*':ti,ab,kw OR 'CP transfusion':ti,ab,kw OR CPT*:ti,ab,kw OR 'passive immunization'/exp OR 'passive immunization*':ti,ab,kw OR 'passive immunisation*':ti,ab,kw OR 'passive antibody transfer':ti,ab,kw OR 'passive immunity transfer':ti,ab,kw OR 'passively acquired immunity':ti,ab,kw OR 'passive immunity':ti,ab,kw OR 'adoptive immunotherapy'/exp OR 'adoptive immunotherap*':ti,ab,kw OR 'adoptive immunisation':ti,ab,kw OR 'adoptive immunization':ti,ab,kw OR 'adoptive transfer':ti,ab,kw OR 'serotherapy'/exp OR 'serotherap*':ti,ab,kw OR 'serum therap*':ti,ab,kw OR 'convalescent serum':ti,ab,kw OR 'convalescent sera':ti,ab,kw OR 'hyperimmune globulin therap*':ti,ab,kw OR 'passive transfer of immunity':ti,ab,kw OR 'adoptive cell transfer*':ti,ab,kw OR 'adoptive cellular immunotherap*':ti,ab,kw OR 'plasma transfusion'/exp OR 'plasma transfusion*':ti,ab,kw OR 'plasma infusion*':ti,ab,kw OR 'serum transfusion*':ti,ab,kw OR 'serum infusion*':ti,ab,kw OR 'CP transfusion*':ti,ab,kw OR CPT*:ti,ab,kw)                                                                                                                                                                                                                                                                                                                                                                                                                                                                                                                                                                                                                                                                                                                                                                                                                                                                                                                                                                                                                                                                                                                                                                                                                                                                                                                                                                                                                                                                      |
| Concept 10: Anti-coagulation      | 'low molecular weight heparin'/exp OR 'heparin*':ti,ab,kw OR 'LMWH':ti,ab,kw OR 'bm 2123':ti,ab,kw OR 'bm2123':ti,ab,kw OR 'choay':ti,ab,kw OR 'ebpm*':ti,ab,kw OR 'ff1034':ti,ab,kw OR 'ff 1034':ti,ab,kw OR 'fr 860':ti,ab,kw OR 'fr860':ti,ab,kw OR 'gag 869':ti,ab,kw OR 'gag869':ti,ab,kw OR                                                                                                                                                                                                                                                                                                                                                                                                                                                                                                                                                                                                                                                                                                                                                                                                                                                                                                                                                                                                                                                                                                                                                                                                                                                                                                                                                                                                                                                                                                                                                                                                                                                                                                                                                                                                                                                                                                                                                                                                                                                                                                                                                                                                                                                                                                                                                                                                                                                                                                                                                                                                                                                                                                                                                                                                                                                     |



|                                                                     |                                                                                                                                                                                                                                                                                                                                                                                                                                                                                                                                                                                                                                                                                                                                                                                                                                                                                                                                                                                                                                                                                                                                                                                                                                                                                                                                                                                                                                                                                                                                                                                                                                                                                                                                                                                                                                                                                                                                                                                                                                                                                                                                                                                                                                                                                                                                                                                                                                                                                                                                                                                                                                                                                                                                                                                                                                                                                                                                                                                                                                                                                                                                                                                                                                                                                                                                                                                                                                                                                                                                                                    |
|---------------------------------------------------------------------|--------------------------------------------------------------------------------------------------------------------------------------------------------------------------------------------------------------------------------------------------------------------------------------------------------------------------------------------------------------------------------------------------------------------------------------------------------------------------------------------------------------------------------------------------------------------------------------------------------------------------------------------------------------------------------------------------------------------------------------------------------------------------------------------------------------------------------------------------------------------------------------------------------------------------------------------------------------------------------------------------------------------------------------------------------------------------------------------------------------------------------------------------------------------------------------------------------------------------------------------------------------------------------------------------------------------------------------------------------------------------------------------------------------------------------------------------------------------------------------------------------------------------------------------------------------------------------------------------------------------------------------------------------------------------------------------------------------------------------------------------------------------------------------------------------------------------------------------------------------------------------------------------------------------------------------------------------------------------------------------------------------------------------------------------------------------------------------------------------------------------------------------------------------------------------------------------------------------------------------------------------------------------------------------------------------------------------------------------------------------------------------------------------------------------------------------------------------------------------------------------------------------------------------------------------------------------------------------------------------------------------------------------------------------------------------------------------------------------------------------------------------------------------------------------------------------------------------------------------------------------------------------------------------------------------------------------------------------------------------------------------------------------------------------------------------------------------------------------------------------------------------------------------------------------------------------------------------------------------------------------------------------------------------------------------------------------------------------------------------------------------------------------------------------------------------------------------------------------------------------------------------------------------------------------------------------|
|                                                                     | <p>'pk 007':ti,ab,kw OR 'pk007':ti,ab,kw OR 'sandoz 5100':ti,ab,kw OR 'sandoz 6700':ti,ab,kw OR 'traxyparin*':ti,ab,kw OR 'adomiparin*':ti,ab,kw OR 'm118':ti,ab,kw OR 'm 118':ti,ab,kw OR 'antixarin*':ti,ab,kw OR 'ardeparin*':ti,ab,kw OR 'normifio':ti,ab,kw OR 'normiflo':ti,ab,kw OR 'wy 90493':ti,ab,kw OR 'wy90493':ti,ab,kw OR 'bemiparin*':ti,ab,kw OR 'entervit':ti,ab,kw OR 'hepadren':ti,ab,kw OR 'hibor':ti,ab,kw OR 'ivor':ti,ab,kw OR 'ivorat':ti,ab,kw OR 'ivormax':ti,ab,kw OR 'phivor':ti,ab,kw OR 'zibor':ti,ab,kw OR 'certoparin*':ti,ab,kw OR 'arteven':ti,ab,kw OR 'badyket':ti,ab,kw OR 'einecs 232-681-7':ti,ab,kw OR 'eparina':ti,ab,kw OR 'mono\$embolex':ti,ab,kw OR 'op 622':ti,ab,kw OR 'op622':ti,ab,kw OR 'op 386':ti,ab,kw OR 'op386':ti,ab,kw OR 'pabyrin*':ti,ab,kw OR 'pulari':ti,ab,kw OR 'sandoparin*':ti,ab,kw OR 'sublingula':ti,ab,kw OR 'troparin*':ti,ab,kw OR 'vitrum a':ti,ab,kw OR 'cy 222':ti,ab,kw OR 'cy222':ti,ab,kw OR 'dalteparin*':ti,ab,kw OR 'fragmin*':ti,ab,kw OR 'k 2165':ti,ab,kw OR 'k2165':ti,ab,kw OR 'kabi 2165':ti,ab,kw OR 'low liquemin*':ti,ab,kw OR 'danap\$roid':ti,ab,kw OR 'kb 101':ti,ab,kw OR 'kb101':ti,ab,kw OR 'lomopar?n':ti,ab,kw OR 'mucoglucuronan':ti,ab,kw OR 'org 10172':ti,ab,kw OR 'org10172':ti,ab,kw OR 'organan':ti,ab,kw OR 'deligoparin*':ti,ab,kw OR 'op 2000':ti,ab,kw OR 'op2000':ti,ab,kw OR 'embolex':ti,ab,kw OR 'enoxaparin*':ti,ab,kw OR 'clexan*':ti,ab,kw OR 'inhixa':ti,ab,kw OR 'klexane':ti,ab,kw OR 'ledraxen':ti,ab,kw OR 'lovenox':ti,ab,kw OR 'neoparin*':ti,ab,kw OR 'pk 10169':ti,ab,kw OR 'pk10169':ti,ab,kw OR 'qualiop klinik':ti,ab,kw OR 'thorinane':ti,ab,kw OR 'fondaparin*':ti,ab,kw OR 'arixtra':ti,ab,kw OR 'ic 851589':ti,ab,kw OR 'ic851589':ti,ab,kw OR 'org 31540':ti,ab,kw OR 'org31540':ti,ab,kw OR 'quixidar':ti,ab,kw OR 'sr 90107':ti,ab,kw OR 'sr 90107a':ti,ab,kw OR 'sr90107':ti,ab,kw OR 'sr90107a':ti,ab,kw OR 'idrabioparinux':ti,ab,kw OR 'ssr 126517':ti,ab,kw OR 'ssr 126517 e':ti,ab,kw OR 'ssr126517':ti,ab,kw OR 'ssr126517e':ti,ab,kw OR 'idraparinux':ti,ab,kw OR 'org 34006':ti,ab,kw OR 'org34006':ti,ab,kw OR 'sanorg 34006':ti,ab,kw OR 'sanorg34006':ti,ab,kw OR 'sr 34006':ti,ab,kw OR 'sr34006':ti,ab,kw OR 'livaraparin* calcium':ti,ab,kw OR 'minolteparin*':ti,ab,kw OR 'nadroparin*':ti,ab,kw OR 'cy 216':ti,ab,kw OR 'cy 216d':ti,ab,kw OR 'cy216':ti,ab,kw OR 'cy216d':ti,ab,kw OR 'fraxiparin*':ti,ab,kw OR 'fraxodi':ti,ab,kw OR 'seledie':ti,ab,kw OR 'seleparin*':ti,ab,kw OR 'tedegliparin*':ti,ab,kw OR 'necuparanib':ti,ab,kw OR 'df 01':ti,ab,kw OR 'df01':ti,ab,kw OR 'm 402':ti,ab,kw OR 'm402':ti,ab,kw OR 'tafoxiparin*':ti,ab,kw OR 'parnaparin*':ti,ab,kw OR 'fluxum':ti,ab,kw OR 'lo\$hepa':ti,ab,kw OR 'minidaltan':ti,ab,kw OR 'op 2123':ti,ab,kw OR 'op2123':ti,ab,kw OR 'parvoparin*':ti,ab,kw OR 'rd 11885':ti,ab,kw OR 'rd11885':ti,ab,kw OR 'reviparin*':ti,ab,kw OR 'clivarin*':ti,ab,kw OR 'clivarodi':ti,ab,kw OR 'lomorin*':ti,ab,kw OR 'lu 47311':ti,ab,kw OR 'lu47311':ti,ab,kw OR 'semuloparin*':ti,ab,kw OR 'ave 5026':ti,ab,kw OR 'ave5026':ti,ab,kw OR 'mulsevo':ti,ab,kw OR 'visamerin*':ti,ab,kw OR 'sevuparin*':ti,ab,kw OR 'tedelparin*':ti,ab,kw OR 'tinzaparin*':ti,ab,kw OR 'innohep':ti,ab,kw OR 'lhn1':ti,ab,kw OR 'lhn 1':ti,ab,kw OR 'logiparin*':ti,ab,kw OR 'anticoagulant agent/de OR 'anticoagula*':ti,ab,kw OR 'anti coagula*':ti,ab,kw OR 'PK-10 169':ti,ab,kw OR 'EMT-967':ti,ab,kw OR 'EMT-966':ti,ab,kw OR '3-phenyl-2-propenoic-acid':ti,ab,kw</p> |
| Concept 11:<br>Ventilation                                          | <p>'positive end expiratory pressure'/exp OR 'positive end expiratory pressure':ti,ab,kw OR 'constant positive pressure breathing':ti,ab,kw OR 'continuous positive airway pressure':ti,ab,kw OR 'continuous positive pressure breathing':ti,ab,kw OR CPAP:ti,ab,kw OR nCPAP:ti,ab,kw OR cppb:ti,ab,kw OR cppv:ti,ab,kw OR 'hyperbaric respiration':ti,ab,kw OR 'hyperbaric ventilation':ti,ab,kw OR 'hyperbaric oxygen*':ti,ab,kw OR PEEP:ti,ab,kw OR 'positive end expiratory pressure breathing':ti,ab,kw OR 'airway pressure release ventilation'/exp OR 'airway pressure release ventilation':ti,ab,kw OR APRV:ti,ab,kw OR 'high flow nasal cannula therapy'/exp OR 'high flow nasal cannula':ti,ab,kw OR HFNC:ti,ab,kw OR 'HF oxygen therap*':ti,ab,kw OR HFNCT:ti,ab,kw OR 'high flow nasal prong':ti,ab,kw OR 'high flow nasal therap*':ti,ab,kw OR 'high flow oxygen*':ti,ab,kw OR OR 'highflow nasal cannula':ti,ab,kw OR 'highflow nasal prong':ti,ab,kw OR 'highflow nasal therap*':ti,ab,kw OR 'highflow oxygen*':ti,ab,kw OR 'HFHNC ventilation':ti,ab,kw OR HHFNC:ti,ab,kw OR 'high flow high humidity nasal cannula':ti,ab,kw OR 'high flow humidified nasal cannula':ti,ab,kw OR 'humidified high flow cannula':ti,ab,kw OR 'humidified high flow nasal cannula':ti,ab,kw OR 'highflow high humidity nasal cannula':ti,ab,kw OR 'highflow humidified nasal cannula':ti,ab,kw OR 'humidified highflow cannula':ti,ab,kw OR 'humidified highflow nasal cannula':ti,ab,kw OR THRIVE:ti,ab,kw OR 'transnasal humidified rapid insufflation ventilatory exchange':ti,ab,kw OR 'trans-nasal humidified rapid insufflation ventilatory exchange':ti,ab,kw OR 'trans-nasal rapid insufflation ventilatory exchange':ti,ab,kw OR 'transnasal rapid insufflation ventilatory exchange':ti,ab,kw</p>                                                                                                                                                                                                                                                                                                                                                                                                                                                                                                                                                                                                                                                                                                                                                                                                                                                                                                                                                                                                                                                                                                                                                                                                                                                                                                                                                                                                                                                                                                                                                                                                                                                                                                                                                         |
| At the end of the search strategy add: NOT 'conference abstract':it |                                                                                                                                                                                                                                                                                                                                                                                                                                                                                                                                                                                                                                                                                                                                                                                                                                                                                                                                                                                                                                                                                                                                                                                                                                                                                                                                                                                                                                                                                                                                                                                                                                                                                                                                                                                                                                                                                                                                                                                                                                                                                                                                                                                                                                                                                                                                                                                                                                                                                                                                                                                                                                                                                                                                                                                                                                                                                                                                                                                                                                                                                                                                                                                                                                                                                                                                                                                                                                                                                                                                                                    |

## Flow charts – Outcomes from the systematic reviewEvidence to decision frameworks

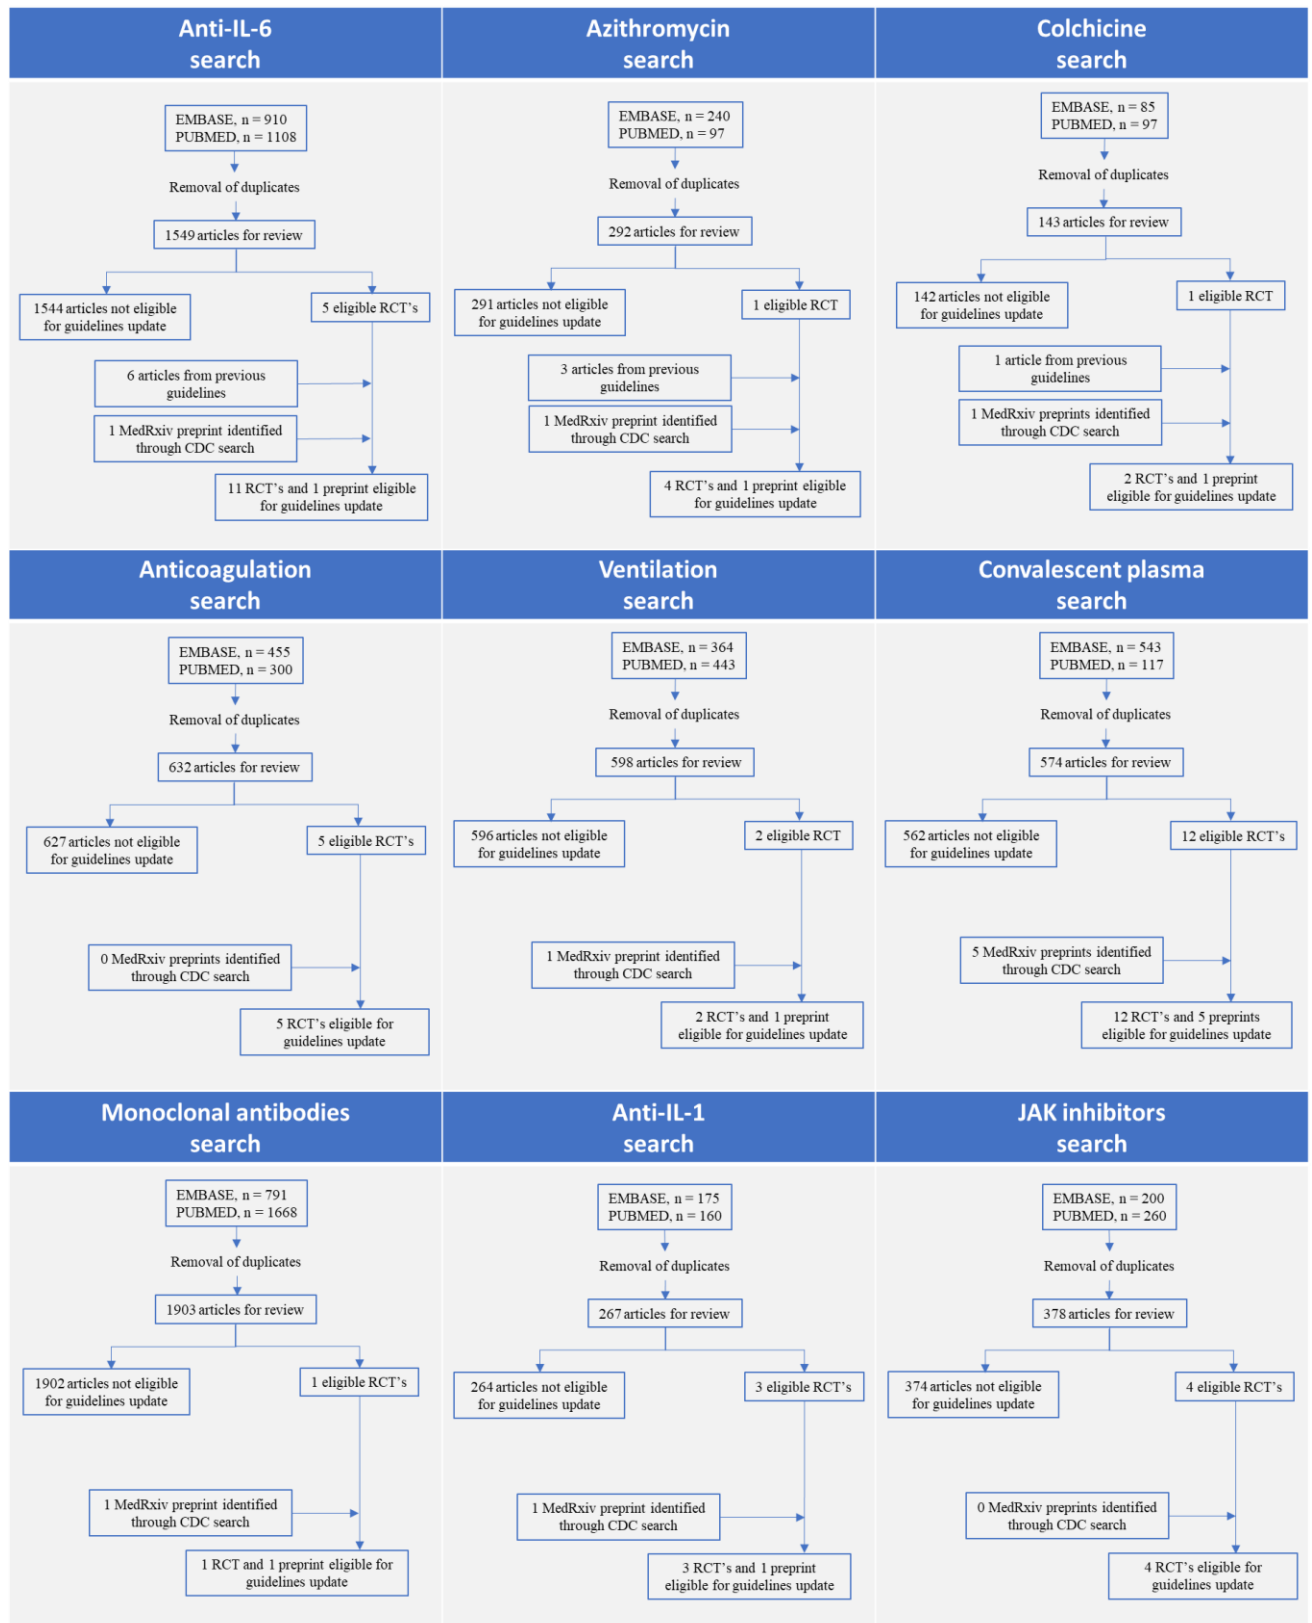

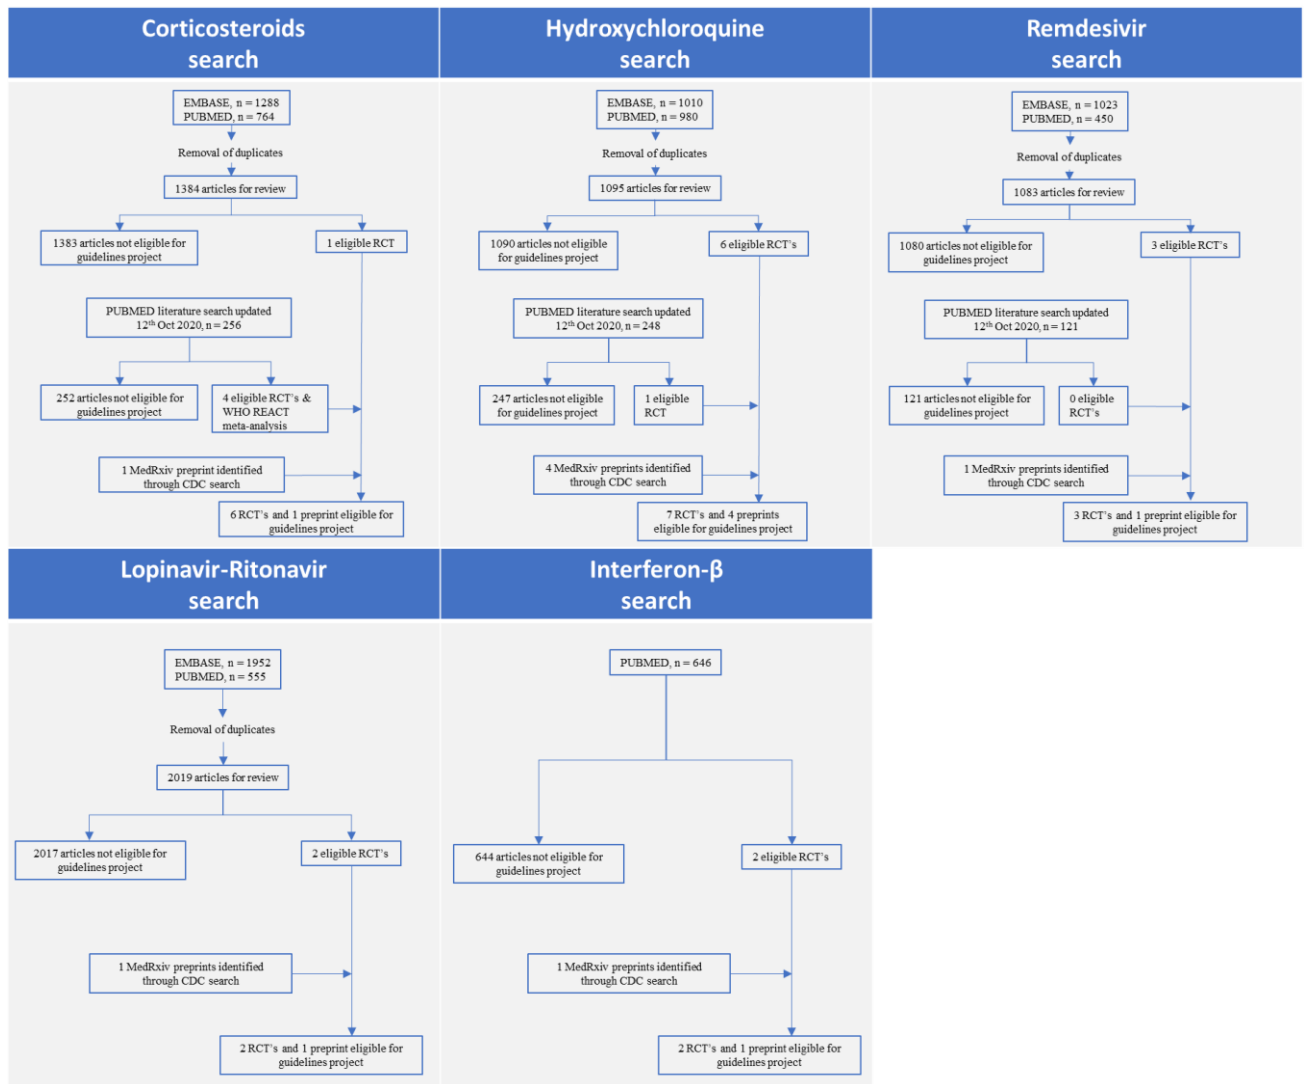

## PICO 1: CORTICOSTEROIDS

| Domain              | Judgement                                                                                                                                                                                                                        | Research evidence<br>Additional considerations                                                                                                                                                                                                                                                                                                                                                                                                                      |
|---------------------|----------------------------------------------------------------------------------------------------------------------------------------------------------------------------------------------------------------------------------|---------------------------------------------------------------------------------------------------------------------------------------------------------------------------------------------------------------------------------------------------------------------------------------------------------------------------------------------------------------------------------------------------------------------------------------------------------------------|
| DESIRABLE EFFECTS   | <p><b>How substantial are the desirable anticipated effects?</b></p> <ul style="list-style-type: none"> <li>○ Trivial</li> <li>○ Small</li> <li>○ Moderate</li> <li>X Large</li> <li>○ Varies</li> <li>○ Don't know</li> </ul>   | <p>The analysis shows a clinically meaningful reduction in mortality.</p> <p>This effect is even greater in the mechanical ventilation subgroup.</p> <p>The effect in the mechanically ventilated subgroup has been confirmed in a meta-analysis of all trials in critically ill patients with a rate ratio of 0.70.</p> <p>The magnitude of benefit may be smaller in those requiring oxygen without mechanical ventilation but remains clinically meaningful.</p> |
| UNDESIRABLE EFFECTS | <p><b>How substantial are the undesirable anticipated effects?</b></p> <ul style="list-style-type: none"> <li>○ Large</li> <li>X Moderate</li> <li>○ Small</li> <li>○ Trivial</li> <li>○ Varies</li> <li>○ Don't know</li> </ul> | <p>Adverse events were not reported in the largest trial, but smaller trials show few safety concerns. There is a well-known safety profile for corticosteroids with adverse effects including hyperglycaemia, bruising, confusion, and secondary infections.</p>                                                                                                                                                                                                   |

|        |                                                                                                                                                                                                                                                                                                                                                                                                                         |                                                                                                                                                                                                                                                                                                                                                                                                                                                                                |
|--------|-------------------------------------------------------------------------------------------------------------------------------------------------------------------------------------------------------------------------------------------------------------------------------------------------------------------------------------------------------------------------------------------------------------------------|--------------------------------------------------------------------------------------------------------------------------------------------------------------------------------------------------------------------------------------------------------------------------------------------------------------------------------------------------------------------------------------------------------------------------------------------------------------------------------|
|        | <p><b>What is the overall certainty of the evidence of effects?</b></p> <ul style="list-style-type: none"> <li>○ Very low</li> <li>○ Low</li> <li>X Moderate</li> <li>○ High</li> <li>○ No included studies</li> </ul>                                                                                                                                                                                                  | <p>The certainty of the most critical endpoint, mortality is high, however adverse events are rated as low. As the majority of endpoints that are important for clinical decision making are rated as high to moderate according to GRADE methodology, the overall quality is regarded as moderate. The consistency of benefit in the meta-analysis for critically ill patients increases certainty that the effect seen in the largest trial (RECOVERY) is generalizable.</p> |
| VALUES | <p><b>Is there important uncertainty about or variability in how much people value the main outcomes?</b></p> <ul style="list-style-type: none"> <li>○ Important uncertainty or variability</li> <li>○ Possibly important uncertainty or variability</li> <li>○ Probably no important uncertainty or variability</li> <li>X No important uncertainty or variability</li> <li>○ No known undesirable outcomes</li> </ul> | <p>There is no uncertainty or variability about how clinicians and patients value mortality.</p>                                                                                                                                                                                                                                                                                                                                                                               |

|                           |                                                                                                                                                                                                                                                                                                                                                                                                                                             |                                                                                                                                                                                                                                                                                                                            |
|---------------------------|---------------------------------------------------------------------------------------------------------------------------------------------------------------------------------------------------------------------------------------------------------------------------------------------------------------------------------------------------------------------------------------------------------------------------------------------|----------------------------------------------------------------------------------------------------------------------------------------------------------------------------------------------------------------------------------------------------------------------------------------------------------------------------|
| <p>BALANCE OF EFFECTS</p> | <p><b>Does the balance between desirable and undesirable effects favour the intervention or the alternative?</b></p> <ul style="list-style-type: none"> <li>○ Favours the alternative</li> <li>○ Probably favours the alternative</li> <li>○ Does not favour either the intervention or the alternative</li> <li>○ Probably favours the intervention</li> <li>X Favours the intervention</li> <li>○ Varies</li> <li>○ Don't know</li> </ul> | <p>Corticosteroids are currently the only therapy proven to reduce mortality in COVID-19. The balance of benefits and risks from the published trials to date clearly favours the intervention. Further data on safety would be desirable but is highly unlikely to change the evaluation of risk versus benefit.</p>      |
| <p>RESOURCES REQUIRED</p> | <p><b>How large are the resource requirements (costs)?</b></p> <ul style="list-style-type: none"> <li>○ Large costs</li> <li>○ Moderate costs</li> <li>○ Negligible costs and savings</li> <li>○ Moderate savings</li> <li>X Large savings</li> <li>○ Varies</li> <li>○ Don't know</li> </ul>                                                                                                                                               | <p>Dexamethasone and other corticosteroids are inexpensive and widely available and therefore resource requirements are low. Savings in terms of reduced mortality, and potentially length of stay or ICU length of stay are likely to off-set any costs although a formal economic evaluation has not been performed.</p> |

|               |                                                                                                                                                                                                                                                                                                                                                                                                                                  |                                                                                                                                                                |
|---------------|----------------------------------------------------------------------------------------------------------------------------------------------------------------------------------------------------------------------------------------------------------------------------------------------------------------------------------------------------------------------------------------------------------------------------------|----------------------------------------------------------------------------------------------------------------------------------------------------------------|
| EQUITY        | <p><b>What would be the impact on health equity?</b></p> <ul style="list-style-type: none"> <li><input type="radio"/> Reduced</li> <li><input type="radio"/> Probably reduced</li> <li><input type="radio"/> Probably no impact</li> <li><input type="radio"/> Probably increased</li> <li><input checked="" type="radio"/> Increased</li> <li><input type="radio"/> Varies</li> <li><input type="radio"/> Don't know</li> </ul> | <p>As a cheap and widely available therapy that can be implemented in low resource settings this treatment should have a positive effect on health equity.</p> |
| ACCEPTABILITY | <p><b>Is the intervention acceptable to key stakeholders?</b></p> <ul style="list-style-type: none"> <li><input type="radio"/> No</li> <li><input type="radio"/> Probably no</li> <li><input type="radio"/> Probably yes</li> <li><input checked="" type="radio"/> Yes</li> <li><input type="radio"/> Varies</li> <li><input type="radio"/> Don't know</li> </ul>                                                                | <p>The treatment is widely used and is acceptable to patients and clinicians.</p>                                                                              |
| FEASIBILITY   | <p><b>Is the intervention feasible to implement?</b></p> <ul style="list-style-type: none"> <li><input type="radio"/> No</li> <li><input type="radio"/> Probably no</li> <li><input type="radio"/> Probably yes</li> <li><input checked="" type="radio"/> Yes</li> </ul>                                                                                                                                                         | <p>There are no implementation concerns as this therapy is widely used.</p>                                                                                    |

|  |                                                                                  |  |
|--|----------------------------------------------------------------------------------|--|
|  | <ul style="list-style-type: none"> <li>○ Varies</li> <li>○ Don't know</li> </ul> |  |
|--|----------------------------------------------------------------------------------|--|

| TYPE OF RECOMMENDATION | Strong recommendation against the intervention                                                                                                                                                                                                                                                                                                                                                                                                                                                    | Conditional recommendation against the intervention | Conditional recommendation for either the intervention or the alternative | Conditional recommendation for the intervention | Strong recommendation for the intervention |
|------------------------|---------------------------------------------------------------------------------------------------------------------------------------------------------------------------------------------------------------------------------------------------------------------------------------------------------------------------------------------------------------------------------------------------------------------------------------------------------------------------------------------------|-----------------------------------------------------|---------------------------------------------------------------------------|-------------------------------------------------|--------------------------------------------|
|                        | ○                                                                                                                                                                                                                                                                                                                                                                                                                                                                                                 | ○                                                   | ○                                                                         | ○                                               | X                                          |
| RECOMMENDATION         | <p>The panel recommends treatment with corticosteroids for patients with COVID-19 infection requiring oxygen, non-invasive mechanical ventilation or invasive mechanical ventilation (strong recommendation, moderate quality of overall evidence)</p> <p>The panel recommends NOT to offer corticosteroids to patients with COVID-19 infection requiring hospitalisation but not requiring supplementary oxygen or ventilatory support (strong recommendation, moderate quality of evidence)</p> |                                                     |                                                                           |                                                 |                                            |



|                                      |                                                                                                                                                                                                                                                                                                                                      |
|--------------------------------------|--------------------------------------------------------------------------------------------------------------------------------------------------------------------------------------------------------------------------------------------------------------------------------------------------------------------------------------|
| <b>JUSTIFICATION</b>                 | The overall risk versus benefit for corticosteroids is favourable with a clear reduction in mortality and improvement in other clinically relevant endpoints. The consistent results across all trials is reassuring that the data from the largest trial is generalizable.                                                          |
| <b>SUBGROUP CONSIDERATIONS</b>       | Recommendations based on subgroups are justified as there is no evidence of benefit in the subgroup of patients without requirement for oxygen.                                                                                                                                                                                      |
| <b>IMPLEMENTATION CONSIDERATIONS</b> | The largest trial used dexamethasone 6mg daily for 10 days and so it is reasonable to suggest this regimen is implemented where possible. The meta-analysis in critically ill patients suggests a similar trend with other corticosteroids and so where dexamethasone is not available it is reasonable to use alternative steroids. |
| <b>MONITORING AND EVALUATION</b>     | Although not reported in trials, care should be taken with patients at higher risk of steroid related adverse effects such as patients with diabetes mellitus. Steroids can exacerbate delirium in elderly patients who are also the population most at risk of severe COVID-19.                                                     |
| <b>RESEARCH PRIORITIES</b>           | Further data on adverse effects and to identify the optimal patient population and treatment duration would be welcome.                                                                                                                                                                                                              |

## PICO 2: IL-6 receptor antagonists

| Problem                                                                                                                                               |                                                                                                                                                                                                                                                                                                                                                                                                                                                                                                                                                                                                                                                                                                                                                                   |                           |
|-------------------------------------------------------------------------------------------------------------------------------------------------------|-------------------------------------------------------------------------------------------------------------------------------------------------------------------------------------------------------------------------------------------------------------------------------------------------------------------------------------------------------------------------------------------------------------------------------------------------------------------------------------------------------------------------------------------------------------------------------------------------------------------------------------------------------------------------------------------------------------------------------------------------------------------|---------------------------|
| Is the problem a priority?                                                                                                                            |                                                                                                                                                                                                                                                                                                                                                                                                                                                                                                                                                                                                                                                                                                                                                                   |                           |
| JUDGEMENT                                                                                                                                             | RESEARCH EVIDENCE                                                                                                                                                                                                                                                                                                                                                                                                                                                                                                                                                                                                                                                                                                                                                 |                           |
| <ul style="list-style-type: none"><li>○ No</li><li>○ Probably no</li><li>○ Probably yes</li><li>● Yes</li><li>○ Varies</li><li>○ Don't know</li></ul> | Yes. There is a need for additional anti-inflammatory/immunomodulatory treatments for hospitalised patients with COVID-19. Evidence suggests the involvement of Interleukin-6 in the pathogenesis of severe COVID-19. This has led to the use of anti-IL-6 therapies in clinical practice. There is therefore a need to know whether these treatments improve clinical outcomes such as mortality or requirement for mechanical ventilation.                                                                                                                                                                                                                                                                                                                      |                           |
| Desirable Effects                                                                                                                                     |                                                                                                                                                                                                                                                                                                                                                                                                                                                                                                                                                                                                                                                                                                                                                                   |                           |
| How substantial are the desirable anticipated effects?                                                                                                |                                                                                                                                                                                                                                                                                                                                                                                                                                                                                                                                                                                                                                                                                                                                                                   |                           |
| JUDGEMENT                                                                                                                                             | RESEARCH EVIDENCE                                                                                                                                                                                                                                                                                                                                                                                                                                                                                                                                                                                                                                                                                                                                                 |                           |
| <ul style="list-style-type: none"><li>○ Trivial</li><li>○ Small</li><li>● Moderate</li><li>○ Large</li><li>○ Varies</li><li>○ Don't know</li></ul>    | Although no significant mortality decrease was found using the prespecified level of statistical significance a trend towards mortality reduction could be seen in the meta-analysis with many of the studies seen to be favouring the intervention. The largest trial contributing to the meta-analysis showed a statistically significant reduction in mortality. This was confirmed when mortality was combined with mechanical ventilation and/or ECMO. In these composite endpoints a significant reduction in progression towards mechanical ventilation, ECMO or death was seen. Significant but smaller positive effects were seen in time to hospital discharge, time to ICU discharge and time to improvement on an ordinal scale in the meta-analysis. |                           |
| Undesirable Effects                                                                                                                                   |                                                                                                                                                                                                                                                                                                                                                                                                                                                                                                                                                                                                                                                                                                                                                                   |                           |
| How substantial are the undesirable anticipated effects?                                                                                              |                                                                                                                                                                                                                                                                                                                                                                                                                                                                                                                                                                                                                                                                                                                                                                   |                           |
| JUDGEMENT                                                                                                                                             | RESEARCH EVIDENCE                                                                                                                                                                                                                                                                                                                                                                                                                                                                                                                                                                                                                                                                                                                                                 | ADDITIONAL CONSIDERATIONS |

|                                                                                                                                                           |                                                                                                                                                                                                                                                                                                                         |                                                                                                                       |
|-----------------------------------------------------------------------------------------------------------------------------------------------------------|-------------------------------------------------------------------------------------------------------------------------------------------------------------------------------------------------------------------------------------------------------------------------------------------------------------------------|-----------------------------------------------------------------------------------------------------------------------|
| <ul style="list-style-type: none"> <li>○ Large</li> <li>○ Moderate</li> <li>● Small</li> <li>○ Trivial</li> <li>○ Varies</li> <li>○ Don't know</li> </ul> | <p>We can conclude with moderate certainty that no increase in adverse or serious adverse events was noted.</p> <p>Clinical experience suggests that IL-6 receptor antagonist treatment can be associated with a significant increase in bacterial infections, although this was not seen in the randomised trials.</p> | <p>There is however serious imprecision as the confidence intervals both show beneficial and detrimental effects.</p> |
|-----------------------------------------------------------------------------------------------------------------------------------------------------------|-------------------------------------------------------------------------------------------------------------------------------------------------------------------------------------------------------------------------------------------------------------------------------------------------------------------------|-----------------------------------------------------------------------------------------------------------------------|

## Certainty of evidence

What is the overall certainty of the evidence of effects?

| JUDGEMENT                                                                                                                                      | RESEARCH EVIDENCE                                                                                                                                                                                                                                                                                           |
|------------------------------------------------------------------------------------------------------------------------------------------------|-------------------------------------------------------------------------------------------------------------------------------------------------------------------------------------------------------------------------------------------------------------------------------------------------------------|
| <ul style="list-style-type: none"> <li>○ Very low</li> <li>○ Low</li> <li>○ Moderate</li> <li>● High</li> <li>○ No included studies</li> </ul> | <p>With the addition of 4 further trials since the previous guideline, the panel rate the certainty of evidence as high as no major risk of bias, inconsistency, indirectness or imprecision could be identified in the majority of studies. Overall, we would score the certainty of evidence as high.</p> |

## Values

Is there important uncertainty about or variability in how much people value the main outcomes?

| JUDGEMENT                                                                                                                                                                                                     | RESEARCH EVIDENCE                                                                                                                                                 |
|---------------------------------------------------------------------------------------------------------------------------------------------------------------------------------------------------------------|-------------------------------------------------------------------------------------------------------------------------------------------------------------------|
| <ul style="list-style-type: none"> <li>○ Important uncertainty or variability</li> <li>○ Possibly important uncertainty or variability</li> <li>○ Probably no important uncertainty or variability</li> </ul> | <p>All variables were deemed to be important or critical. Patient input confirmed that mortality or requirement for mechanical ventilation were key outcomes.</p> |

|                                                                                                                                                                                                                                                                                                                |                                                                                                                                                                                                                                                                                                                                                                                                                                                                                                                                                                            |
|----------------------------------------------------------------------------------------------------------------------------------------------------------------------------------------------------------------------------------------------------------------------------------------------------------------|----------------------------------------------------------------------------------------------------------------------------------------------------------------------------------------------------------------------------------------------------------------------------------------------------------------------------------------------------------------------------------------------------------------------------------------------------------------------------------------------------------------------------------------------------------------------------|
| <ul style="list-style-type: none"> <li>• No important uncertainty or variability</li> </ul>                                                                                                                                                                                                                    |                                                                                                                                                                                                                                                                                                                                                                                                                                                                                                                                                                            |
| <b>Balance of effects</b><br>Does the balance between desirable and undesirable effects favor the intervention or the comparison?                                                                                                                                                                              |                                                                                                                                                                                                                                                                                                                                                                                                                                                                                                                                                                            |
| <b>JUDGEMENT</b>                                                                                                                                                                                                                                                                                               | <b>RESEARCH EVIDENCE</b>                                                                                                                                                                                                                                                                                                                                                                                                                                                                                                                                                   |
| <ul style="list-style-type: none"> <li>○ Favors the comparison</li> <li>○ Probably favors the comparison</li> <li>○ Does not favor either the intervention or the comparison</li> <li>○ Probably favors the intervention</li> <li>• Favors the intervention</li> <li>○ Varies</li> <li>○ Don't know</li> </ul> | There's a non-significant increase in adverse events with no effect on serious adverse events but with a significant effect on important and critical outcome measures such as: the combined outcomes of progression towards mechanical ventilation, ECMO or death; the combined outcome of mechanical ventilation or death and mechanical ventilation. A trend towards mortality reduction was seen and a small but significant effect was seen on other variables such as time to hospital discharge, time to ICU discharge and time to improvement on an ordinal scale. |
| <b>Resources required</b><br>How large are the resource requirements (costs)?                                                                                                                                                                                                                                  |                                                                                                                                                                                                                                                                                                                                                                                                                                                                                                                                                                            |
| <b>JUDGEMENT</b>                                                                                                                                                                                                                                                                                               | <b>RESEARCH EVIDENCE</b>                                                                                                                                                                                                                                                                                                                                                                                                                                                                                                                                                   |
| <ul style="list-style-type: none"> <li>○ Large costs</li> <li>○ Moderate costs</li> <li>○ Negligible costs and savings</li> <li>○ Moderate savings</li> <li>○ Large savings</li> <li>• Varies</li> <li>○ Don't know</li> </ul>                                                                                 | IL6-receptor antagonists are expensive, however they are relatively straightforward to administer in a hospital environment. The cost savings have not been fully quantified but reducing mortality and requirement for ICU admission is likely to offset some of the costs of therapy.                                                                                                                                                                                                                                                                                    |
| <b>Certainty of evidence of required resources</b><br>What is the certainty of the evidence of resource requirements (costs)?                                                                                                                                                                                  |                                                                                                                                                                                                                                                                                                                                                                                                                                                                                                                                                                            |
| <b>JUDGEMENT</b>                                                                                                                                                                                                                                                                                               | <b>RESEARCH EVIDENCE</b>                                                                                                                                                                                                                                                                                                                                                                                                                                                                                                                                                   |

|                                                                                                                                                                                                                                                                                                                         |                                                                                                                                                                                                                                                                                                                                                                    |
|-------------------------------------------------------------------------------------------------------------------------------------------------------------------------------------------------------------------------------------------------------------------------------------------------------------------------|--------------------------------------------------------------------------------------------------------------------------------------------------------------------------------------------------------------------------------------------------------------------------------------------------------------------------------------------------------------------|
| <ul style="list-style-type: none"> <li>○ Very low</li> <li>○ Low</li> <li>○ Moderate</li> <li>○ High</li> <li>● No included studies</li> </ul>                                                                                                                                                                          | <p>No studies tackled the cost-effectiveness of IL6-receptor antagonists.</p>                                                                                                                                                                                                                                                                                      |
| <b>Cost effectiveness</b><br>Does the cost-effectiveness of the intervention favor the intervention or the comparison?                                                                                                                                                                                                  |                                                                                                                                                                                                                                                                                                                                                                    |
| <b>JUDGEMENT</b>                                                                                                                                                                                                                                                                                                        | <b>RESEARCH EVIDENCE</b>                                                                                                                                                                                                                                                                                                                                           |
| <ul style="list-style-type: none"> <li>○ Favors the comparison</li> <li>○ Probably favors the comparison</li> <li>○ Does not favor either the intervention or the comparison</li> <li>○ Probably favors the intervention</li> <li>○ Favors the intervention</li> <li>○ Varies</li> <li>● No included studies</li> </ul> | <p>The positive effect on mechanical ventilation, ECMO, death, as well as time to hospital or ICU discharge and clinical improvement need to be weighed against the cost of the treatment. All these factors will vary significantly based on country and hospital setting. Further economic analysis is warranted. No studies included evaluated this aspect.</p> |
| <b>Equity</b><br>What would be the impact on health equity?                                                                                                                                                                                                                                                             |                                                                                                                                                                                                                                                                                                                                                                    |
| <b>JUDGEMENT</b>                                                                                                                                                                                                                                                                                                        | <b>RESEARCH EVIDENCE</b>                                                                                                                                                                                                                                                                                                                                           |
| <ul style="list-style-type: none"> <li>○ Reduced</li> <li>● Probably reduced</li> <li>○ Probably no impact</li> </ul>                                                                                                                                                                                                   | <p>This is an expensive therapy that may not be available in all countries or regions of the world. There is therefore a risk that recommending this therapy will decrease health equity unless measures are taken to ensure broad access.</p>                                                                                                                     |

|                                                                                                                                                              |                                                                                                  |
|--------------------------------------------------------------------------------------------------------------------------------------------------------------|--------------------------------------------------------------------------------------------------|
| <ul style="list-style-type: none"> <li>○ Probably increased</li> <li>○ Increased</li> <li>○ Varies</li> <li>○ Don't know</li> </ul>                          |                                                                                                  |
| <b>Acceptability</b><br>Is the intervention acceptable to key stakeholders?                                                                                  |                                                                                                  |
| <b>JUDGEMENT</b>                                                                                                                                             | <b>RESEARCH EVIDENCE</b>                                                                         |
| <ul style="list-style-type: none"> <li>○ No</li> <li>○ Probably no</li> <li>○ Probably yes</li> <li>● Yes</li> <li>○ Varies</li> <li>○ Don't know</li> </ul> | The treatment has been used for other disease and is likely to be acceptable.                    |
| <b>Feasibility</b><br>Is the intervention feasible to implement?                                                                                             |                                                                                                  |
| <b>JUDGEMENT</b>                                                                                                                                             | <b>RESEARCH EVIDENCE</b>                                                                         |
| <ul style="list-style-type: none"> <li>○ No</li> <li>○ Probably no</li> <li>○ Probably yes</li> <li>● Yes</li> <li>○ Varies</li> <li>○ Don't know</li> </ul> | IL6-receptor antagonists are easy to administer and therefore feasible to implement in practice. |

## TYPE OF RECOMMENDATION

|                                                     |                                                          |                                                                               |                                                      |                                                 |
|-----------------------------------------------------|----------------------------------------------------------|-------------------------------------------------------------------------------|------------------------------------------------------|-------------------------------------------------|
| Strong recommendation against the intervention<br>○ | Conditional recommendation against the intervention<br>○ | Conditional recommendation for either the intervention or the comparison<br>○ | Conditional recommendation for the intervention<br>○ | Strong recommendation for the intervention<br>● |
|-----------------------------------------------------|----------------------------------------------------------|-------------------------------------------------------------------------------|------------------------------------------------------|-------------------------------------------------|

## CONCLUSIONS

### Recommendation

The panel recommends offering IL-6 receptor antagonist monoclonal antibody therapy to hospitalised patients with COVID-19 requiring oxygen or ventilatory support who have received systematic corticosteroids (Strong recommendation, high quality of evidence)

The panel suggests NOT to offer IL-6 receptor antagonist monoclonal antibody to patients not requiring supplementary oxygen (Conditional recommendation, low quality of evidence)

### Justification

The panel found a large volume of evidence supporting beneficial effects of IL-6 receptor antagonist monoclonal antibodies in COVID-19. The benefits are have the potential to significantly impact upon mortality and requirement for critical care in hospitalised patients. The adverse events were few and no increase in serious adverse events was observed. Therefore the balance of risk and benefit clearly favours the intervention. The benefit of IL-6 receptor antagonists is only seen in patients who have also received corticosteroids and therefore this treatment should be administered alongside or in addition to corticosteroids.

### Subgroup considerations

No further specific subgroup considerations.

### Implementation considerations

Further research on cost-effectiveness is warranted as well as studies to establish the relative benefit of IL-6 therapy compared to other emerging anti-inflammatory treatments.

## Monitoring and evaluation

Tocilizumab was most often prescribed as a 8 mg/kg dose IV over 1 hour (with a maximum of 800mg). This dose could be repeated after 12-24 hours depending on the evolution of the patient. In some studies, a lower dose was used due to cost and supply considerations (6mg/kg with a maximum dose of 480mg or a flat dose of 400mg). Sarilumab was used in studies in both 400mg and 200mg intravenously or subcutaneously.

## Research priorities

Due to the cost of the treatment, further cost-effectiveness trials are warranted.



### PICO 3: Hydroxychloroquine

| Domain                 | Judgement                                                                                                                                        | Research evidence<br>Additional considerations                                             |
|------------------------|--------------------------------------------------------------------------------------------------------------------------------------------------|--------------------------------------------------------------------------------------------|
| DESIRABLE<br>EFFECTS   | <b>How substantial are the desirable anticipated effects?</b><br><br>X Trivial<br>○ Small<br>○ Moderate<br>○ Large<br>○ Varies<br>○ Don't know   | No clinical endpoints showed significant benefits.                                         |
| UNDESIRABLE<br>EFFECTS | <b>How substantial are the undesirable anticipated effects?</b><br><br>X Large<br>○ Moderate<br>○ Small<br>○ Trivial<br>○ Varies<br>○ Don't know | A large increase in adverse effects was demonstrated in the meta-analysis (44.3% vs 15.4%) |

|        |                                                                                                                                                                                                                                                                                                                                                                                                                         |                                                                                                                                                         |
|--------|-------------------------------------------------------------------------------------------------------------------------------------------------------------------------------------------------------------------------------------------------------------------------------------------------------------------------------------------------------------------------------------------------------------------------|---------------------------------------------------------------------------------------------------------------------------------------------------------|
|        | <p><b>What is the overall certainty of the evidence of effects?</b></p> <ul style="list-style-type: none"> <li>○ Very low</li> <li>○ Low</li> <li>X Moderate</li> <li>○ High</li> <li>○ No included studies</li> </ul>                                                                                                                                                                                                  | Moderate                                                                                                                                                |
| VALUES | <p><b>Is there important uncertainty about or variability in how much people value the main outcomes?</b></p> <ul style="list-style-type: none"> <li>○ Important uncertainty or variability</li> <li>○ Possibly important uncertainty or variability</li> <li>○ Probably no important uncertainty or variability</li> <li>X No important uncertainty or variability</li> <li>○ No known undesirable outcomes</li> </ul> | The endpoints evaluated are those such as mortality, ICU admission and adverse events which are considered highly important by clinicians and patients. |

|                           |                                                                                                                                                                                                                                                                                                                                                                                                                                           |                                                                                                                                                                               |
|---------------------------|-------------------------------------------------------------------------------------------------------------------------------------------------------------------------------------------------------------------------------------------------------------------------------------------------------------------------------------------------------------------------------------------------------------------------------------------|-------------------------------------------------------------------------------------------------------------------------------------------------------------------------------|
| <p>BALANCE OF EFFECTS</p> | <p><b>Does the balance between desirable and undesirable effects favour the intervention or the alternative?</b></p> <p>X Favours the alternative</p> <ul style="list-style-type: none"> <li>○ Probably favours the alternative</li> <li>○ Does not favour either the intervention or the alternative</li> <li>○ Probably favours the intervention</li> <li>○ Favours the intervention</li> <li>○ Varies</li> <li>○ Don't know</li> </ul> | <p>As there are no clinical benefits and a significant increase in adverse events this would not favour the intervention.</p>                                                 |
| <p>RESOURCES REQUIRED</p> | <p><b>How large are the resource requirements (costs)?</b></p> <ul style="list-style-type: none"> <li>○ Large costs</li> <li>○ Moderate costs</li> </ul> <p>X Negligible costs and savings</p> <ul style="list-style-type: none"> <li>○ Moderate savings</li> <li>○ Large savings</li> <li>○ Varies</li> <li>○ Don't know</li> </ul>                                                                                                      | <p>Hydroxychloroquine is widely available and not expensive but more importantly not recommended. In the absence of clinical benefit it is unlikely to be cost-effective.</p> |

|               |                                                                                                                                                                                                                                                                                                                                                                                                                                  |                                                                                                                                           |
|---------------|----------------------------------------------------------------------------------------------------------------------------------------------------------------------------------------------------------------------------------------------------------------------------------------------------------------------------------------------------------------------------------------------------------------------------------|-------------------------------------------------------------------------------------------------------------------------------------------|
| EQUITY        | <p><b>What would be the impact on health equity?</b></p> <ul style="list-style-type: none"> <li><input type="radio"/> Reduced</li> <li><input type="radio"/> Probably reduced</li> <li><input checked="" type="radio"/> Probably no impact</li> <li><input type="radio"/> Probably increased</li> <li><input type="radio"/> Increased</li> <li><input type="radio"/> Varies</li> <li><input type="radio"/> Don't know</li> </ul> | <p>Hydroxychloroquine is not recommended for the treatment of COVID-19 and therefore should not have an impact on health equity.</p>      |
| ACCEPTABILITY | <p><b>Is the intervention acceptable to key stakeholders?</b></p> <ul style="list-style-type: none"> <li><input type="radio"/> No</li> <li><input type="radio"/> Probably no</li> <li><input checked="" type="radio"/> Probably yes</li> <li><input type="radio"/> Yes</li> <li><input type="radio"/> Varies</li> <li><input type="radio"/> Don't know</li> </ul>                                                                | <p>Hydroxychloroquine is acceptable to stakeholders for appropriate use but it is not recommended for COVID-19 due to safety reasons.</p> |
| FEASIBILITY   | <p><b>Is the intervention feasible to implement?</b></p> <ul style="list-style-type: none"> <li><input type="radio"/> No</li> <li><input type="radio"/> Probably no</li> <li><input checked="" type="radio"/> Probably yes</li> <li><input type="radio"/> Yes</li> </ul>                                                                                                                                                         | <p>Hydroxychloroquine is widely available for appropriate use but is not recommended for COVID-19 due to safety reasons.</p>              |

|  |                                                                                  |  |
|--|----------------------------------------------------------------------------------|--|
|  | <ul style="list-style-type: none"> <li>○ Varies</li> <li>○ Don't know</li> </ul> |  |
|--|----------------------------------------------------------------------------------|--|

| TYPE OF RECOMMENDATION | Strong recommendation <b>against</b> the intervention                                                                               | Conditional recommendation <b>against</b> the intervention | Conditional recommendation for either the intervention or the alternative | Conditional recommendation <b>for</b> the intervention | Strong recommendation <b>for</b> the intervention |
|------------------------|-------------------------------------------------------------------------------------------------------------------------------------|------------------------------------------------------------|---------------------------------------------------------------------------|--------------------------------------------------------|---------------------------------------------------|
|                        | X                                                                                                                                   | ○                                                          | ○                                                                         | ○                                                      | ○                                                 |
| RECOMMENDATION         | The panel recommends NOT to offer hydroxychloroquine to patients with COVID-19 infection (strong recommendation, moderate evidence) |                                                            |                                                                           |                                                        |                                                   |
| JUSTIFICATION          | The strongest evidence is for an increase in adverse events with no evidence of clinical benefit.                                   |                                                            |                                                                           |                                                        |                                                   |

|                                      |                                                                                                  |
|--------------------------------------|--------------------------------------------------------------------------------------------------|
| <b>SUBGROUP CONSIDERATIONS</b>       | No subgroup analyses were performed.                                                             |
| <b>IMPLEMENTATION CONSIDERATIONS</b> | Implementation would be easy if it were to be approved for COVID-19 use.                         |
| <b>MONITORING AND EVALUATION</b>     | n/a as not recommended for use.                                                                  |
| <b>RESEARCH PRIORITIES</b>           | Due to negative health impact, future studies on this repurposed agent should not be encouraged. |

## PICO 4: Azithromycin

| <b>Problem</b><br>Is the problem a priority?                                                                                                          |                                                                                                                                                                                                                                                                                                                                                                                                          |
|-------------------------------------------------------------------------------------------------------------------------------------------------------|----------------------------------------------------------------------------------------------------------------------------------------------------------------------------------------------------------------------------------------------------------------------------------------------------------------------------------------------------------------------------------------------------------|
| JUDGEMENT                                                                                                                                             | RESEARCH EVIDENCE                                                                                                                                                                                                                                                                                                                                                                                        |
| <ul style="list-style-type: none"><li>○ No</li><li>○ Probably no</li><li>○ Probably yes</li><li>● Yes</li><li>○ Varies</li><li>○ Don't know</li></ul> | Yes. There is a need for additional anti-inflammatory/immunomodulatory treatments for hospitalised patients with COVID-19. Evidence suggests that azithromycin has anti-inflammatory effects which has led some to use it for treatment of SARS-CoV-2. There is therefore a need to know whether these treatments improve clinical outcomes such as mortality or requirement for mechanical ventilation. |
| <b>Desirable Effects</b><br>How substantial are the desirable anticipated effects?                                                                    |                                                                                                                                                                                                                                                                                                                                                                                                          |
| JUDGEMENT                                                                                                                                             | RESEARCH EVIDENCE                                                                                                                                                                                                                                                                                                                                                                                        |
| <ul style="list-style-type: none"><li>● Trivial</li><li>○ Small</li><li>○ Moderate</li><li>○ Large</li><li>○ Varies</li><li>○ Don't know</li></ul>    | No significant improvements were seen in any outcomes after the administration of azithromycin.                                                                                                                                                                                                                                                                                                          |
| <b>Undesirable Effects</b><br>How substantial are the undesirable anticipated effects?                                                                |                                                                                                                                                                                                                                                                                                                                                                                                          |
| JUDGEMENT                                                                                                                                             | RESEARCH EVIDENCE                                                                                                                                                                                                                                                                                                                                                                                        |

|                                                                                                                                                                                                               |                                                                                                                                                                                  |
|---------------------------------------------------------------------------------------------------------------------------------------------------------------------------------------------------------------|----------------------------------------------------------------------------------------------------------------------------------------------------------------------------------|
| <ul style="list-style-type: none"> <li>○ Large</li> <li>● Moderate</li> <li>○ Small</li> <li>○ Trivial</li> <li>○ Varies</li> <li>○ Don't know</li> </ul>                                                     | There was no significant increase in adverse events noted in the included trials.                                                                                                |
| <b>Certainty of evidence</b><br>What is the overall certainty of the evidence of effects?                                                                                                                     |                                                                                                                                                                                  |
| <b>JUDGEMENT</b>                                                                                                                                                                                              | <b>RESEARCH EVIDENCE</b>                                                                                                                                                         |
| <ul style="list-style-type: none"> <li>○ Very low</li> <li>○ Low</li> <li>● Moderate</li> <li>○ High</li> <li>○ No included studies</li> </ul>                                                                | The previous guidelines noted low certainty of evidence however with the addition of RECOVERY and ATOMIC2 (additional 8000 patients) the certainty has improved in all outcomes. |
| <b>Values</b><br>Is there important uncertainty about or variability in how much people value the main outcomes?                                                                                              |                                                                                                                                                                                  |
| <b>JUDGEMENT</b>                                                                                                                                                                                              | <b>RESEARCH EVIDENCE</b>                                                                                                                                                         |
| <ul style="list-style-type: none"> <li>○ Important uncertainty or variability</li> <li>○ Possibly important uncertainty or variability</li> <li>○ Probably no important uncertainty or variability</li> </ul> | All variables were deemed to be important or critical as assessed by the panel and patient.                                                                                      |



|                                                                                                                                                                                                                                                                                                                |                                                                                                                                                                                                                                     |
|----------------------------------------------------------------------------------------------------------------------------------------------------------------------------------------------------------------------------------------------------------------------------------------------------------------|-------------------------------------------------------------------------------------------------------------------------------------------------------------------------------------------------------------------------------------|
| <ul style="list-style-type: none"> <li>• No important uncertainty or variability</li> </ul>                                                                                                                                                                                                                    |                                                                                                                                                                                                                                     |
| <b>Balance of effects</b><br>Does the balance between desirable and undesirable effects favor the intervention or the comparison?                                                                                                                                                                              |                                                                                                                                                                                                                                     |
| <b>JUDGEMENT</b>                                                                                                                                                                                                                                                                                               | <b>RESEARCH EVIDENCE</b>                                                                                                                                                                                                            |
| <ul style="list-style-type: none"> <li>○ Favors the comparison</li> <li>• Probably favors the comparison</li> <li>○ Does not favor either the intervention or the comparison</li> <li>○ Probably favors the intervention</li> <li>○ Favors the intervention</li> <li>○ Varies</li> <li>○ Don't know</li> </ul> | Azithromycin is generally safe to use, however as no beneficial evidence for its use in COVID-19 has yet been found when no underlying infection is present, it is not recommended for use so as to avoid unnecessary side effects. |
| <b>Resources required</b><br>How large are the resource requirements (costs)?                                                                                                                                                                                                                                  |                                                                                                                                                                                                                                     |
| <b>JUDGEMENT</b>                                                                                                                                                                                                                                                                                               | <b>RESEARCH EVIDENCE</b>                                                                                                                                                                                                            |
| <ul style="list-style-type: none"> <li>○ Large costs</li> <li>• Moderate costs</li> <li>○ Negligible costs and savings</li> <li>○ Moderate savings</li> <li>○ Large savings</li> <li>○ Varies</li> <li>○ Don't know</li> </ul>                                                                                 | Azithromycin is readily available and relatively inexpensive                                                                                                                                                                        |
| <b>Certainty of evidence of required resources</b><br>What is the certainty of the evidence of resource requirements (costs)?                                                                                                                                                                                  |                                                                                                                                                                                                                                     |
| <b>JUDGEMENT</b>                                                                                                                                                                                                                                                                                               | <b>RESEARCH EVIDENCE</b>                                                                                                                                                                                                            |

|                                                                                                                                                                                                                                                                                                                         |                                                                                                                                                                           |
|-------------------------------------------------------------------------------------------------------------------------------------------------------------------------------------------------------------------------------------------------------------------------------------------------------------------------|---------------------------------------------------------------------------------------------------------------------------------------------------------------------------|
| <ul style="list-style-type: none"> <li>○ Very low</li> <li>○ Low</li> <li>● Moderate</li> <li>○ High</li> <li>○ No included studies</li> </ul>                                                                                                                                                                          | <p>Azithromycin is used for other conditions and is widely available</p>                                                                                                  |
| <b>Cost effectiveness</b><br>Does the cost-effectiveness of the intervention favor the intervention or the comparison?                                                                                                                                                                                                  |                                                                                                                                                                           |
| <b>JUDGEMENT</b>                                                                                                                                                                                                                                                                                                        | <b>RESEARCH EVIDENCE</b>                                                                                                                                                  |
| <ul style="list-style-type: none"> <li>○ Favors the comparison</li> <li>● Probably favors the comparison</li> <li>○ Does not favor either the intervention or the comparison</li> <li>○ Probably favors the intervention</li> <li>○ Favors the intervention</li> <li>○ Varies</li> <li>○ No included studies</li> </ul> | <p>Azithromycin is inexpensive but with no clinical benefit, there is no cost saving through its use.</p>                                                                 |
| <b>Equity</b><br>What would be the impact on health equity?                                                                                                                                                                                                                                                             |                                                                                                                                                                           |
| <b>JUDGEMENT</b>                                                                                                                                                                                                                                                                                                        | <b>RESEARCH EVIDENCE</b>                                                                                                                                                  |
| <ul style="list-style-type: none"> <li>○ Reduced</li> <li>○ Probably reduced</li> <li>● Probably no impact</li> </ul>                                                                                                                                                                                                   | <p>Health equity would be increased only for those treated with an additional underlying bacterial infection and not for those whose primary condition is SARS-CoV-2.</p> |

|                                                                                                                                                              |                                                  |
|--------------------------------------------------------------------------------------------------------------------------------------------------------------|--------------------------------------------------|
| <ul style="list-style-type: none"> <li>○ Probably increased</li> <li>○ Increased</li> <li>○ Varies</li> <li>○ Don't know</li> </ul>                          |                                                  |
| <b>Acceptability</b><br>Is the intervention acceptable to key stakeholders?                                                                                  |                                                  |
| <b>JUDGEMENT</b>                                                                                                                                             | <b>RESEARCH EVIDENCE</b>                         |
| <ul style="list-style-type: none"> <li>○ No</li> <li>○ Probably no</li> <li>● Probably yes</li> <li>○ Yes</li> <li>○ Varies</li> <li>○ Don't know</li> </ul> | yes, the treatment is widely used.               |
| <b>Feasibility</b><br>Is the intervention feasible to implement?                                                                                             |                                                  |
| <b>JUDGEMENT</b>                                                                                                                                             | <b>RESEARCH EVIDENCE</b>                         |
| <ul style="list-style-type: none"> <li>○ No</li> <li>○ Probably no</li> <li>○ Probably yes</li> <li>● Yes</li> <li>○ Varies</li> <li>○ Don't know</li> </ul> | yes, the treatment is widely used and available. |

## TYPE OF RECOMMENDATION

|                                                |                                                     |                                                                          |                                                 |                                            |
|------------------------------------------------|-----------------------------------------------------|--------------------------------------------------------------------------|-------------------------------------------------|--------------------------------------------|
| Strong recommendation against the intervention | Conditional recommendation against the intervention | Conditional recommendation for either the intervention or the comparison | Conditional recommendation for the intervention | Strong recommendation for the intervention |
|------------------------------------------------|-----------------------------------------------------|--------------------------------------------------------------------------|-------------------------------------------------|--------------------------------------------|

|   |   |   |   |   |
|---|---|---|---|---|
| • | ○ | ○ | ○ | ○ |
|---|---|---|---|---|

## CONCLUSIONS

### Recommendation

The panel suggest the recommendations issued from the original guidelines remain in place - treatment should only be given to those who have underlying bacterial infection.

### Justification

Original guideline justification remains; No clinical benefits have been clearly demonstrated for use of azithromycin as an anti-inflammatory drug for COVID-19. It is acknowledged that the prevalence of secondary bacterial infection in COVID-19 is not fully established, and that azithromycin may be used for its antibacterial effect in this context. Antimicrobial resistance may result from widespread use of azithromycin if used unnecessarily. The panel suggest the recommendations issued from the original guidelines remain in place - treatment should only be given to those who have underlying bacterial infection.

### Subgroup considerations

No subgroup analysis has been performed.

### Implementation considerations

It is not recommended that this intervention is implemented as a standard of care treatment for COVID-19

### Monitoring and evaluation

## Research priorities

It is not believed that any further studies of azithromycin for the treatment of COVID-19 are required or will change the recommendations.

## PICO 5- Azithromycin and hydroxychloroquine

| Domain              | Judgement                                                                                                                                                                                                   | Research evidence<br>Additional considerations                                                                                                                                                                                                                                                                                                    |
|---------------------|-------------------------------------------------------------------------------------------------------------------------------------------------------------------------------------------------------------|---------------------------------------------------------------------------------------------------------------------------------------------------------------------------------------------------------------------------------------------------------------------------------------------------------------------------------------------------|
| DESIRABLE EFFECTS   | <p><b>How substantial are the desirable anticipated effects?</b></p> <p>X Trivial<br/>           ○ Small<br/>           ○ Moderate<br/>           ○ Large</p> <p>○ Varies<br/>           ○ Don't know</p>   | <p>No clinical benefits demonstrated were demonstrated for any of the endpoints.</p>                                                                                                                                                                                                                                                              |
| UNDESIRABLE EFFECTS | <p><b>How substantial are the undesirable anticipated effects?</b></p> <p>○ Large<br/>           X Moderate<br/>           ○ Small<br/>           ○ Trivial</p> <p>○ Varies<br/>           ○ Don't know</p> | <p>A significant increase in adverse events (39.3% vs 22.6%) was demonstrated. Azithromycin also runs a risk of increased antimicrobial resistance which was not actively studied but is nevertheless a known effect of the drug. Cardiovascular side effects including prolonged QT interval are potential side effects of this combination.</p> |

|        |                                                                                                                                                                                                                                                                                                                                                                                                                  |                                                                                          |
|--------|------------------------------------------------------------------------------------------------------------------------------------------------------------------------------------------------------------------------------------------------------------------------------------------------------------------------------------------------------------------------------------------------------------------|------------------------------------------------------------------------------------------|
|        | <b>What is the overall certainty of the evidence of effects?</b> <ul style="list-style-type: none"> <li>○ Very low</li> <li>○ Low</li> <li>X Moderate</li> <li>○ High</li> <li>○ No included studies</li> </ul>                                                                                                                                                                                                  | Moderate                                                                                 |
| VALUES | <b>Is there important uncertainty about or variability in how much people value the main outcomes?</b> <ul style="list-style-type: none"> <li>○ Important uncertainty or variability</li> <li>○ Possibly important uncertainty or variability</li> <li>○ Probably no important uncertainty or variability</li> <li>X No important uncertainty or variability</li> <li>○ No known undesirable outcomes</li> </ul> | The main outcomes studied are considered clinically relevant by patients and clinicians. |

|                                  |                                                                                                                                                                                                                                                                                                                                                                                                                                             |                                                                                                                                                                                                                 |
|----------------------------------|---------------------------------------------------------------------------------------------------------------------------------------------------------------------------------------------------------------------------------------------------------------------------------------------------------------------------------------------------------------------------------------------------------------------------------------------|-----------------------------------------------------------------------------------------------------------------------------------------------------------------------------------------------------------------|
| <p><b>BALANCE OF EFFECTS</b></p> | <p><b>Does the balance between desirable and undesirable effects favour the intervention or the alternative?</b></p> <ul style="list-style-type: none"> <li>○ Favours the alternative</li> <li>X Probably favours the alternative</li> <li>○ Does not favour either the intervention or the alternative</li> <li>○ Probably favours the intervention</li> <li>○ Favours the intervention</li> <li>○ Varies</li> <li>○ Don't know</li> </ul> | <p>No clinical benefits and an increase in adverse events suggests an unfavourable balance between benefits and risks.</p>                                                                                      |
| <p><b>RESOURCES REQUIRED</b></p> | <p><b>How large are the resource requirements (costs)?</b></p> <ul style="list-style-type: none"> <li>○ Large costs</li> <li>X Moderate costs</li> <li>○ Negligible costs and savings</li> <li>○ Moderate savings</li> <li>○ Large savings</li> <li>○ Varies</li> <li>○ Don't know</li> </ul>                                                                                                                                               | <p>Both drugs are inexpensive so unlikely to result in a major increase in healthcare costs. Nevertheless as neither drug alone or in combination provides clinical benefits there will be no cost savings.</p> |



|               |                                                                                                                                                                                                                                                                                                                                                                                                                                  |                                                                                                                                                |
|---------------|----------------------------------------------------------------------------------------------------------------------------------------------------------------------------------------------------------------------------------------------------------------------------------------------------------------------------------------------------------------------------------------------------------------------------------|------------------------------------------------------------------------------------------------------------------------------------------------|
| EQUITY        | <p><b>What would be the impact on health equity?</b></p> <ul style="list-style-type: none"> <li><input type="radio"/> Reduced</li> <li><input type="radio"/> Probably reduced</li> <li><input checked="" type="radio"/> Probably no impact</li> <li><input type="radio"/> Probably increased</li> <li><input type="radio"/> Increased</li> <li><input type="radio"/> Varies</li> <li><input type="radio"/> Don't know</li> </ul> | <p>As the treatment has not been shown to have effectiveness it will not have an effect on health equity.</p>                                  |
| ACCEPTABILITY | <p><b>Is the intervention acceptable to key stakeholders?</b></p> <ul style="list-style-type: none"> <li><input type="radio"/> No</li> <li><input type="radio"/> Probably no</li> <li><input checked="" type="radio"/> Probably yes</li> <li><input type="radio"/> Yes</li> <li><input type="radio"/> Varies</li> <li><input type="radio"/> Don't know</li> </ul>                                                                | <p>Both drugs are widely available and used for other indications and therefore likely to be accepted if proven in future to have benefit.</p> |
| FEASIBILITY   | <p><b>Is the intervention feasible to implement?</b></p> <ul style="list-style-type: none"> <li><input type="radio"/> No</li> <li><input type="radio"/> Probably no</li> <li><input type="radio"/> Probably yes</li> <li><input checked="" type="radio"/> Yes</li> </ul>                                                                                                                                                         | <p>Both drugs are widely available.</p>                                                                                                        |

|  |                                                                                  |  |
|--|----------------------------------------------------------------------------------|--|
|  | <ul style="list-style-type: none"> <li>○ Varies</li> <li>○ Don't know</li> </ul> |  |
|--|----------------------------------------------------------------------------------|--|

| TYPE OF RECOMMENDATION | Strong recommendation <b>against</b> the intervention                                                                                                                                                                                                                                                                                                                                                                       | Conditional recommendation <b>against</b> the intervention | Conditional recommendation for either the intervention or the alternative | Conditional recommendation <b>for</b> the intervention | Strong recommendation <b>for</b> the intervention |
|------------------------|-----------------------------------------------------------------------------------------------------------------------------------------------------------------------------------------------------------------------------------------------------------------------------------------------------------------------------------------------------------------------------------------------------------------------------|------------------------------------------------------------|---------------------------------------------------------------------------|--------------------------------------------------------|---------------------------------------------------|
|                        | ○                                                                                                                                                                                                                                                                                                                                                                                                                           | X                                                          | ○                                                                         | ○                                                      | ○                                                 |
| RECOMMENDATION         | The panel suggests NOT to offer hydroxychloroquine and azithromycin for hospitalised patients with COVID-19 (conditional recommendation, moderate quality of evidence).                                                                                                                                                                                                                                                     |                                                            |                                                                           |                                                        |                                                   |
| JUSTIFICATION          | Azithromycin administration was not associated with improved clinical status in a single randomised, open label study where azithromycin was combined with hydroxychloroquine. The panel notes that azithromycin has a well-established safety profile but that that antibiotic use promotes antibiotic resistance. The conditional recommendation against azithromycin use is based on a limited dataset summarized in the |                                                            |                                                                           |                                                        |                                                   |

|                                      |                                                                                                                                                                                                                                                                                                                                                                                                                                     |
|--------------------------------------|-------------------------------------------------------------------------------------------------------------------------------------------------------------------------------------------------------------------------------------------------------------------------------------------------------------------------------------------------------------------------------------------------------------------------------------|
|                                      | online supplement. Despite the limited data, the absence of any clinically relevant benefits of hydroxychloroquine or azithromycin alone argues against any benefit of the combination treatment.                                                                                                                                                                                                                                   |
| <b>SUBGROUP CONSIDERATIONS</b>       | No subgroup analyses were performed.                                                                                                                                                                                                                                                                                                                                                                                                |
| <b>IMPLEMENTATION CONSIDERATIONS</b> | As no clinical benefits were demonstrated there are no subgroup considerations.                                                                                                                                                                                                                                                                                                                                                     |
| <b>MONITORING AND EVALUATION</b>     | As we are not recommending that the treatments are used, no monitoring or evaluation is required.                                                                                                                                                                                                                                                                                                                                   |
| <b>RESEARCH PRIORITIES</b>           | Despite limited data for the combination therapy, the lack of benefit of hydroxychloroquine alone suggests no further trials of a combination treatment containing hydroxychloroquine are justified, particularly in light of potential serious cardiac adverse events and other side effects. The committee recommends studying other antiviral options in well-designed studies of repurposed or SARS-CoV-2 specific medications. |

## PICO 6: Colchicine

| <b>Problem</b><br>Is the problem a priority?                                                                                                          |                                                                                                                                                                                                                                                                                                                                                                                                                                                                                                                                                                                                                     |
|-------------------------------------------------------------------------------------------------------------------------------------------------------|---------------------------------------------------------------------------------------------------------------------------------------------------------------------------------------------------------------------------------------------------------------------------------------------------------------------------------------------------------------------------------------------------------------------------------------------------------------------------------------------------------------------------------------------------------------------------------------------------------------------|
| JUDGEMENT                                                                                                                                             | RESEARCH EVIDENCE                                                                                                                                                                                                                                                                                                                                                                                                                                                                                                                                                                                                   |
| <ul style="list-style-type: none"><li>○ No</li><li>○ Probably no</li><li>○ Probably yes</li><li>● Yes</li><li>○ Varies</li><li>○ Don't know</li></ul> | <p>Yes. There is a need for additional anti-inflammatory/immunomodulatory treatments for hospitalised patients with COVID-19. Colchicine has been shown to have anti-inflammatory effects in various models and is used for anti-inflammatory effects in gout. There is therefore a need to know whether these treatments improve clinical outcomes such as mortality or requirement for mechanical ventilation.</p>                                                                                                                                                                                                |
| <b>Desirable Effects</b><br>How substantial are the desirable anticipated effects?                                                                    |                                                                                                                                                                                                                                                                                                                                                                                                                                                                                                                                                                                                                     |
| JUDGEMENT                                                                                                                                             | RESEARCH EVIDENCE                                                                                                                                                                                                                                                                                                                                                                                                                                                                                                                                                                                                   |
| <ul style="list-style-type: none"><li>○ Trivial</li><li>● Small</li><li>○ Moderate</li><li>○ Large</li><li>○ Varies</li><li>○ Don't know</li></ul>    | <p>Despite one additional trial being added to the analysis since the original guidelines, the only significance treatment response was seen in “deterioration” (defined as 2 points on an ordinal scale) where in the colchicine arm, fewer patients showed deterioration (OR 0.11 (95% CI: 0.01 to 0.96)). This was based on small trials which were found to be of low methodological quality. Other important outcome measures were not significant.</p> <p>The majority of data informing this question were from the large RECOVERY trial which found no benefit of Colchicine compared to standard care.</p> |
| <b>Undesirable Effects</b><br>How substantial are the undesirable anticipated effects?                                                                |                                                                                                                                                                                                                                                                                                                                                                                                                                                                                                                                                                                                                     |
| JUDGEMENT                                                                                                                                             | RESEARCH EVIDENCE                                                                                                                                                                                                                                                                                                                                                                                                                                                                                                                                                                                                   |

|                                                                                                                                                                                                                                                                  |                                                                                                                                                                                                                |
|------------------------------------------------------------------------------------------------------------------------------------------------------------------------------------------------------------------------------------------------------------------|----------------------------------------------------------------------------------------------------------------------------------------------------------------------------------------------------------------|
| <ul style="list-style-type: none"> <li>○ Large</li> <li>● Moderate</li> <li>○ Small</li> <li>○ Trivial</li> <li>○ Varies</li> <li>○ Don't know</li> </ul>                                                                                                        | <p>The most prominent side-effects are diarrhoea which is a well known side effect of colchicine. Colchicine has an OR of 3.70 (95% CI: 1.68 to 8.16) indicating a substantially higher risk of diarrhoea.</p> |
| <b>Certainty of evidence</b><br>What is the overall certainty of the evidence of effects?                                                                                                                                                                        |                                                                                                                                                                                                                |
| <b>JUDGEMENT</b>                                                                                                                                                                                                                                                 | <b>RESEARCH EVIDENCE</b>                                                                                                                                                                                       |
| <ul style="list-style-type: none"> <li>○ Very low</li> <li>○ Low</li> <li>● Moderate</li> <li>○ High</li> <li>○ No included studies</li> </ul>                                                                                                                   | <p>Overall we deemed the certainty of the evidence moderate which has improved substantially since the original guidelines.</p>                                                                                |
| <b>Values</b><br>Is there important uncertainty about or variability in how much people value the main outcomes?                                                                                                                                                 |                                                                                                                                                                                                                |
| <b>JUDGEMENT</b>                                                                                                                                                                                                                                                 | <b>RESEARCH EVIDENCE</b>                                                                                                                                                                                       |
| <ul style="list-style-type: none"> <li>○ Important uncertainty or variability</li> <li>○ Possibly important uncertainty or variability</li> <li>○ Probably no important uncertainty or variability</li> <li>● No important uncertainty or variability</li> </ul> | <p>All endpoints evaluated are rated as important or critical.</p>                                                                                                                                             |
| <b>Balance of effects</b><br>Does the balance between desirable and undesirable effects favor the intervention or the comparison?                                                                                                                                |                                                                                                                                                                                                                |

| JUDGEMENT                                                                                                                                                                                                                                                                                                      | RESEARCH EVIDENCE                                                                                                                                                                                                                             |
|----------------------------------------------------------------------------------------------------------------------------------------------------------------------------------------------------------------------------------------------------------------------------------------------------------------|-----------------------------------------------------------------------------------------------------------------------------------------------------------------------------------------------------------------------------------------------|
| <ul style="list-style-type: none"> <li>● Favors the comparison</li> <li>○ Probably favors the comparison</li> <li>○ Does not favor either the intervention or the comparison</li> <li>○ Probably favors the intervention</li> <li>○ Favors the intervention</li> <li>○ Varies</li> <li>○ Don't know</li> </ul> | <p>The absence of a significant effect on the majority of outcomes with only a significant effect on deterioration (2 points on an ordinal scale) but with a significant increase in diarrhoea, results in favoring the comparison group.</p> |
| <b>Resources required</b><br>How large are the resource requirements (costs)?                                                                                                                                                                                                                                  |                                                                                                                                                                                                                                               |
| JUDGEMENT                                                                                                                                                                                                                                                                                                      | RESEARCH EVIDENCE                                                                                                                                                                                                                             |
| <ul style="list-style-type: none"> <li>○ Large costs</li> <li>○ Moderate costs</li> <li>● Negligible costs and savings</li> <li>○ Moderate savings</li> <li>○ Large savings</li> <li>○ Varies</li> <li>○ Don't know</li> </ul>                                                                                 | <p>Colchicine is cheap and widely available and therefore resource requirements are small or negligible</p>                                                                                                                                   |
| <b>Certainty of evidence of required resources</b><br>What is the certainty of the evidence of resource requirements (costs)?                                                                                                                                                                                  |                                                                                                                                                                                                                                               |
| JUDGEMENT                                                                                                                                                                                                                                                                                                      | RESEARCH EVIDENCE                                                                                                                                                                                                                             |

|                                                                                                                                                                                                                                                                                                                         |                                                                                                                                                                                                                     |
|-------------------------------------------------------------------------------------------------------------------------------------------------------------------------------------------------------------------------------------------------------------------------------------------------------------------------|---------------------------------------------------------------------------------------------------------------------------------------------------------------------------------------------------------------------|
| <ul style="list-style-type: none"> <li>○ Very low</li> <li>○ Low</li> <li>○ Moderate</li> <li>● High</li> <li>○ No included studies</li> </ul>                                                                                                                                                                          | Colchicine price is widely known to be cheap but the effects in clinical practice do not support its use.                                                                                                           |
| <b>Cost effectiveness</b><br>Does the cost-effectiveness of the intervention favor the intervention or the comparison?                                                                                                                                                                                                  |                                                                                                                                                                                                                     |
| <b>JUDGEMENT</b>                                                                                                                                                                                                                                                                                                        | <b>RESEARCH EVIDENCE</b>                                                                                                                                                                                            |
| <ul style="list-style-type: none"> <li>● Favors the comparison</li> <li>○ Probably favors the comparison</li> <li>○ Does not favor either the intervention or the comparison</li> <li>○ Probably favors the intervention</li> <li>○ Favors the intervention</li> <li>○ Varies</li> <li>○ No included studies</li> </ul> | Due to the lack of significant clinical effect but with relevant adverse effects (which also need treatment), this analysis probably favors the comparison although no formal economic analysis has been performed. |
| <b>Equity</b><br>What would be the impact on health equity?                                                                                                                                                                                                                                                             |                                                                                                                                                                                                                     |
| <b>JUDGEMENT</b>                                                                                                                                                                                                                                                                                                        | <b>RESEARCH EVIDENCE</b>                                                                                                                                                                                            |
| <ul style="list-style-type: none"> <li>○ Reduced</li> <li>○ Probably reduced</li> <li>● Probably no impact</li> </ul>                                                                                                                                                                                                   | No clinical significant effect in most outcome variables with increased adverse effects.                                                                                                                            |

|                                                                                                                                                              |                                                            |
|--------------------------------------------------------------------------------------------------------------------------------------------------------------|------------------------------------------------------------|
| <ul style="list-style-type: none"> <li>○ Probably increased</li> <li>○ Increased</li> <li>○ Varies</li> <li>○ Don't know</li> </ul>                          |                                                            |
| <b>Acceptability</b><br>Is the intervention acceptable to key stakeholders?                                                                                  |                                                            |
| <b>JUDGEMENT</b>                                                                                                                                             | <b>RESEARCH EVIDENCE</b>                                   |
| <ul style="list-style-type: none"> <li>○ No</li> <li>○ Probably no</li> <li>○ Probably yes</li> <li>● Yes</li> <li>○ Varies</li> <li>○ Don't know</li> </ul> | Yes, widely used drug without issues around acceptability. |
| <b>Feasibility</b><br>Is the intervention feasible to implement?                                                                                             |                                                            |
| <b>JUDGEMENT</b>                                                                                                                                             | <b>RESEARCH EVIDENCE</b>                                   |
| <ul style="list-style-type: none"> <li>○ No</li> <li>○ Probably no</li> <li>○ Probably yes</li> <li>● Yes</li> <li>○ Varies</li> <li>○ Don't know</li> </ul> | yes                                                        |



## TYPE OF RECOMMENDATION

|                                                     |                                                          |                                                                               |                                                      |                                                 |
|-----------------------------------------------------|----------------------------------------------------------|-------------------------------------------------------------------------------|------------------------------------------------------|-------------------------------------------------|
| Strong recommendation against the intervention<br>● | Conditional recommendation against the intervention<br>○ | Conditional recommendation for either the intervention or the comparison<br>○ | Conditional recommendation for the intervention<br>○ | Strong recommendation for the intervention<br>○ |
|-----------------------------------------------------|----------------------------------------------------------|-------------------------------------------------------------------------------|------------------------------------------------------|-------------------------------------------------|

## CONCLUSIONS

### Recommendation

The panel recommend NOT to offer colchicine to hospitalised patient with COVID-19 infection (strong recommendation, moderate quality of evidence)

### Justification

Colchicine had only an effect on deterioration (based on a 2 point difference on an ordinal scale) which was deemed an important outcome but failed to show an effect on all other important and critical outcomes. The largest randomised study convincingly showed not clinical benefits of treatment. Moreover a significant effect on increased adverse effects was noted (diarrhoea).

### Subgroup considerations

Subgroup analyses did not identify a group of patients with a significant benefit from Colchicine.

### Implementation considerations

Straightforward to implement if colchicine was shown to have a more pronounced beneficial effect.

## Monitoring and evaluation

Dosage of colchicine differed across all three trials. Deftereos et al. used a 1.5-mg loading dose followed by 0.5 mg after 60 min and maintenance doses of 0.5 mg twice daily for three weeks, whereas Lopes et al. preferred a 0.5mg thrice daily for 5 days followed by 0.5mg twice daily for 5 days. Finally Horby et al. gave 1mg followed by 0.5mg 12 hours later and then 0.5mg twice daily for 10 days in total.

## Research priorities

The panel suggests further trials of colchicine are not warranted in this patient population and recommends studying alternative anti-inflammatory and immunomodulatory agents.

# **PICO 7: Lopinavir-ritonavir**

| Domain              | Judgement                                                                                                                                        | Research evidence<br>Additional considerations                                                                                                                                                                              |
|---------------------|--------------------------------------------------------------------------------------------------------------------------------------------------|-----------------------------------------------------------------------------------------------------------------------------------------------------------------------------------------------------------------------------|
| DESIRABLE EFFECTS   | <b>How substantial are the desirable anticipated effects?</b><br><br>X Trivial<br>○ Small<br>○ Moderate<br>○ Large<br>○ Varies<br>○ Don't know   | No evidence of clinical benefits demonstrated in the meta-analysis. In particular there was no benefit on mortality, time to clinical improvement, improvement on the WHO ordinal scale or invasive mechanical ventilation. |
| UNDESIRABLE EFFECTS | <b>How substantial are the undesirable anticipated effects?</b><br><br>○ Large<br>○ Moderate<br>○ Small<br>X Trivial<br>○ Varies<br>○ Don't know | Adverse events were not significantly increased, although there are well recognised issues with drug-drug interactions and adverse events which may not have been adequately detected in the trials.                        |

|        |                                                                                                                                                                                                                                                                                                                                                                                                                  |                                                                                                        |
|--------|------------------------------------------------------------------------------------------------------------------------------------------------------------------------------------------------------------------------------------------------------------------------------------------------------------------------------------------------------------------------------------------------------------------|--------------------------------------------------------------------------------------------------------|
|        | <b>What is the overall certainty of the evidence of effects?</b> <ul style="list-style-type: none"> <li>○ Very low</li> <li>X Low</li> <li>○ Moderate</li> <li>○ High</li> <li>○ No included studies</li> </ul>                                                                                                                                                                                                  | Low                                                                                                    |
| VALUES | <b>Is there important uncertainty about or variability in how much people value the main outcomes?</b> <ul style="list-style-type: none"> <li>○ Important uncertainty or variability</li> <li>○ Possibly important uncertainty or variability</li> <li>○ Probably no important uncertainty or variability</li> <li>X No important uncertainty or variability</li> <li>○ No known undesirable outcomes</li> </ul> | No, endpoints in clinical improvements are rated as important or critical for clinicians and patients. |

|                           |                                                                                                                                                                                                                                                                                                                                                                                                                                           |                                                                                                                                                                                                                                 |
|---------------------------|-------------------------------------------------------------------------------------------------------------------------------------------------------------------------------------------------------------------------------------------------------------------------------------------------------------------------------------------------------------------------------------------------------------------------------------------|---------------------------------------------------------------------------------------------------------------------------------------------------------------------------------------------------------------------------------|
| <p>BALANCE OF EFFECTS</p> | <p><b>Does the balance between desirable and undesirable effects favour the intervention or the alternative?</b></p> <p>X Favours the alternative</p> <ul style="list-style-type: none"> <li>○ Probably favours the alternative</li> <li>○ Does not favour either the intervention or the alternative</li> <li>○ Probably favours the intervention</li> <li>○ Favours the intervention</li> <li>○ Varies</li> <li>○ Don't know</li> </ul> | <p>There are no demonstrated clinical benefits. Although increased adverse events were not identified the largest trials did not systematically collect adverse event data. Therefore, there are important potential risks.</p> |
| <p>RESOURCES REQUIRED</p> | <p><b>How large are the resource requirements (costs)?</b></p> <ul style="list-style-type: none"> <li>○ Large costs</li> <li>X Moderate costs</li> <li>○ Negligible costs and savings</li> <li>○ Moderate savings</li> <li>○ Large savings</li> <li>○ Varies</li> <li>○ Don't know</li> </ul>                                                                                                                                             | <p>The drug is widely available in clinical use for HIV and is not prohibitively expensive.</p>                                                                                                                                 |

|               |                                                                                                                                                                                                                                                                                                                                                                                                                                  |                                                                                                                                                                               |
|---------------|----------------------------------------------------------------------------------------------------------------------------------------------------------------------------------------------------------------------------------------------------------------------------------------------------------------------------------------------------------------------------------------------------------------------------------|-------------------------------------------------------------------------------------------------------------------------------------------------------------------------------|
| EQUITY        | <p><b>What would be the impact on health equity?</b></p> <ul style="list-style-type: none"> <li><input type="radio"/> Reduced</li> <li><input type="radio"/> Probably reduced</li> <li><input checked="" type="radio"/> Probably no impact</li> <li><input type="radio"/> Probably increased</li> <li><input type="radio"/> Increased</li> <li><input type="radio"/> Varies</li> <li><input type="radio"/> Don't know</li> </ul> | <p>As the therapy has no clinical benefits it would not have a meaningful effect on health equity.</p>                                                                        |
| ACCEPTABILITY | <p><b>Is the intervention acceptable to key stakeholders?</b></p> <ul style="list-style-type: none"> <li><input type="radio"/> No</li> <li><input checked="" type="radio"/> Probably no</li> <li><input type="radio"/> Probably yes</li> <li><input type="radio"/> Yes</li> <li><input type="radio"/> Varies</li> <li><input type="radio"/> Don't know</li> </ul>                                                                | <p>Physicians and patients find this therapy less acceptable than others due to large drug-drug interactions and risk of adverse events.</p>                                  |
| FEASIBILITY   | <p><b>Is the intervention feasible to implement?</b></p> <ul style="list-style-type: none"> <li><input type="radio"/> No</li> <li><input type="radio"/> Probably no</li> <li><input checked="" type="radio"/> Probably yes</li> <li><input type="radio"/> Yes</li> </ul>                                                                                                                                                         | <p>As above, drug-drug interactions make the drug more difficult to use than others, although if the benefit was meaningful, it is likely this could be used in practice.</p> |

|  |                                                                                  |  |
|--|----------------------------------------------------------------------------------|--|
|  | <ul style="list-style-type: none"> <li>○ Varies</li> <li>○ Don't know</li> </ul> |  |
|--|----------------------------------------------------------------------------------|--|

| TYPE OF RECOMMENDATION | Strong recommendation against the intervention                                                                                                                                        | Conditional recommendation against the intervention | Conditional recommendation for either the intervention or the alternative | Conditional recommendation for the intervention | Strong recommendation for the intervention |
|------------------------|---------------------------------------------------------------------------------------------------------------------------------------------------------------------------------------|-----------------------------------------------------|---------------------------------------------------------------------------|-------------------------------------------------|--------------------------------------------|
|                        | X                                                                                                                                                                                     | ○                                                   | ○                                                                         | ○                                               | ○                                          |
| RECOMMENDATION         | The panel recommends that patients hospitalised with COVID-19 are NOT offered lopinavir-ritonavir (Strong recommendation, low quality of evidence)                                    |                                                     |                                                                           |                                                 |                                            |
| JUSTIFICATION          | There is no evidence of benefit and while no evidence of harm was identified the treatment has a known adverse event profile and drug-drug interactions that would argue against use. |                                                     |                                                                           |                                                 |                                            |

|                                      |                                                                                                                              |
|--------------------------------------|------------------------------------------------------------------------------------------------------------------------------|
| <b>SUBGROUP CONSIDERATIONS</b>       | No subgroups show any benefit and so the recommendation applies to all subgroups.                                            |
| <b>IMPLEMENTATION CONSIDERATIONS</b> | N/A                                                                                                                          |
| <b>MONITORING AND EVALUATION</b>     | N/A                                                                                                                          |
| <b>RESEARCH PRIORITIES</b>           | As two very large trials clearly show no benefit, no further trials of lopinavir-ritonavir in this population are justified. |



**PICO 8: Remdesivir**

| Domain              | Judgement                                                                                                                                                                                                                        | Research evidence<br>Additional considerations                                                                                                                                                                                                                                                                                                                                                                                             |
|---------------------|----------------------------------------------------------------------------------------------------------------------------------------------------------------------------------------------------------------------------------|--------------------------------------------------------------------------------------------------------------------------------------------------------------------------------------------------------------------------------------------------------------------------------------------------------------------------------------------------------------------------------------------------------------------------------------------|
| DESIRABLE EFFECTS   | <p><b>How substantial are the desirable anticipated effects?</b></p> <ul style="list-style-type: none"> <li>○ Trivial</li> <li>X Small</li> <li>○ Moderate</li> <li>○ Large</li> <li>○ Varies</li> <li>○ Don't know</li> </ul>   | <p>A reduction in time to recovery and length of hospital stay was demonstrated in one trial (ACTT1). Little or no clinical benefits were demonstrated in the other trials including the large SOLIDARITY trial which found no evidence of a mortality benefit. The benefits demonstrated are therefore those from ACTT1 only. The desirable effects are absent in the subgroup of patients in ACTT1 requiring mechanical ventilation.</p> |
| UNDESIRABLE EFFECTS | <p><b>How substantial are the undesirable anticipated effects?</b></p> <ul style="list-style-type: none"> <li>○ Large</li> <li>○ Moderate</li> <li>X Small</li> <li>○ Trivial</li> <li>○ Varies</li> <li>○ Don't know</li> </ul> | <p>No significant increase in adverse effects. Pooled estimate for serious adverse effects suggests fewer SAEs with treatment.</p>                                                                                                                                                                                                                                                                                                         |

|        |                                                                                                                                                                                                                                                                                                                                                                                                                  |                                                                                                                                                                                                                                                                                                                                                                      |
|--------|------------------------------------------------------------------------------------------------------------------------------------------------------------------------------------------------------------------------------------------------------------------------------------------------------------------------------------------------------------------------------------------------------------------|----------------------------------------------------------------------------------------------------------------------------------------------------------------------------------------------------------------------------------------------------------------------------------------------------------------------------------------------------------------------|
|        | <b>What is the overall certainty of the evidence of effects?</b> <ul style="list-style-type: none"> <li>○ Very low</li> <li>○ Low</li> <li>X Moderate</li> <li>○ High</li> <li>○ No included studies</li> </ul>                                                                                                                                                                                                  | Moderate                                                                                                                                                                                                                                                                                                                                                             |
| VALUES | <b>Is there important uncertainty about or variability in how much people value the main outcomes?</b> <ul style="list-style-type: none"> <li>○ Important uncertainty or variability</li> <li>X Possibly important uncertainty or variability</li> <li>○ Probably no important uncertainty or variability</li> <li>○ No important uncertainty or variability</li> <li>○ No known undesirable outcomes</li> </ul> | <p>The guideline panel and patient representative agreed that all of the included endpoints and outcomes are important or critical for clinical decision making. Reduced length of hospital stay, and more rapid recovery would still be considered clinically meaningful in the absence of a mortality benefit by many clinicians and patients, but not by all.</p> |

|                                  |                                                                                                                                                                                                                                                                                                                                                                                                                                             |                                                                                                                                                                                                                                                                                                                                                                                                          |
|----------------------------------|---------------------------------------------------------------------------------------------------------------------------------------------------------------------------------------------------------------------------------------------------------------------------------------------------------------------------------------------------------------------------------------------------------------------------------------------|----------------------------------------------------------------------------------------------------------------------------------------------------------------------------------------------------------------------------------------------------------------------------------------------------------------------------------------------------------------------------------------------------------|
| <p><b>BALANCE OF EFFECTS</b></p> | <p><b>Does the balance between desirable and undesirable effects favour the intervention or the alternative?</b></p> <ul style="list-style-type: none"> <li>○ Favours the alternative</li> <li>○ Probably favours the alternative</li> <li>○ Does not favour either the intervention or the alternative</li> <li>○ Probably favours the intervention</li> <li>○ Favours the intervention</li> <li>X Varies</li> <li>○ Don't know</li> </ul> | <p>The reported benefits are modest and are supported by only one randomised trial.</p> <p>A limitation of the data to date is a need to determine the additional benefit of remdesivir on top of corticosteroids now that corticosteroids are standard of care.</p> <p>The balance of effects is negative in the ICU population where no improvement in time to clinical recovery was demonstrated.</p> |
| <p><b>RESOURCES REQUIRED</b></p> | <p><b>How large are the resource requirements (costs)?</b></p> <ul style="list-style-type: none"> <li>X Large costs</li> <li>○ Moderate costs</li> <li>○ Negligible costs and savings</li> <li>○ Moderate savings</li> <li>○ Large savings</li> <li>○ Varies</li> <li>○ Don't know</li> </ul>                                                                                                                                               | <p>This therapy is expensive and there have been shortages of the drug at some stages during the pandemic. The treatment has to be administered intravenously.</p>                                                                                                                                                                                                                                       |

|               |                                                                                                                                                                                                                                                                                                                                                                                                                                  |                                                                                                                                                                                                                   |
|---------------|----------------------------------------------------------------------------------------------------------------------------------------------------------------------------------------------------------------------------------------------------------------------------------------------------------------------------------------------------------------------------------------------------------------------------------|-------------------------------------------------------------------------------------------------------------------------------------------------------------------------------------------------------------------|
| EQUITY        | <p><b>What would be the impact on health equity?</b></p> <ul style="list-style-type: none"> <li><input type="radio"/> Reduced</li> <li><input checked="" type="radio"/> Probably reduced</li> <li><input type="radio"/> Probably no impact</li> <li><input type="radio"/> Probably increased</li> <li><input type="radio"/> Increased</li> <li><input type="radio"/> Varies</li> <li><input type="radio"/> Don't know</li> </ul> | <p>As the treatment is expensive and may not be available to all patients, this may have an impact on health equity.</p>                                                                                          |
| ACCEPTABILITY | <p><b>Is the intervention acceptable to key stakeholders?</b></p> <ul style="list-style-type: none"> <li><input type="radio"/> No</li> <li><input type="radio"/> Probably no</li> <li><input type="radio"/> Probably yes</li> <li><input checked="" type="radio"/> Yes</li> <li><input type="radio"/> Varies</li> <li><input type="radio"/> Don't know</li> </ul>                                                                | <p>Antiviral treatment is an established concept in respiratory infections and so the treatment is acceptable to patients and clinicians.</p>                                                                     |
| FEASIBILITY   | <p><b>Is the intervention feasible to implement?</b></p> <ul style="list-style-type: none"> <li><input type="radio"/> No</li> <li><input type="radio"/> Probably no</li> <li><input type="radio"/> Probably yes</li> <li><input checked="" type="radio"/> Yes</li> </ul>                                                                                                                                                         | <p>Subject to the comments above regarding drug availability and cost, it is feasible to implement the treatment in a clinical setting and it has been used widely across Europe during the pandemic to date.</p> |

|  |                                                                                  |  |
|--|----------------------------------------------------------------------------------|--|
|  | <ul style="list-style-type: none"> <li>○ Varies</li> <li>○ Don't know</li> </ul> |  |
|--|----------------------------------------------------------------------------------|--|

| TYPE OF RECOMMENDATION | Strong recommendation against the intervention                                                                                                                                                                                                                                                                                                                                        | Conditional recommendation against the intervention | Conditional recommendation for either the intervention or the alternative | Conditional recommendation for the intervention | Strong recommendation for the intervention |
|------------------------|---------------------------------------------------------------------------------------------------------------------------------------------------------------------------------------------------------------------------------------------------------------------------------------------------------------------------------------------------------------------------------------|-----------------------------------------------------|---------------------------------------------------------------------------|-------------------------------------------------|--------------------------------------------|
|                        | ○                                                                                                                                                                                                                                                                                                                                                                                     | ○                                                   | X                                                                         | ○                                               | ○                                          |
| RECOMMENDATION         | <p>The panel makes no recommendation on offering remdesivir to patients hospitalised with COVID-19 infection (conditional recommendation, moderate quality of evidence)</p> <p>The panel suggests not to offer remdesivir to patients hospitalised with COVID-19 infection who require invasive mechanical ventilation (conditional recommendation, moderate quality of evidence)</p> |                                                     |                                                                           |                                                 |                                            |
| JUSTIFICATION          | <p>The panel considers that time to recovery and length of hospital stay are relevant clinical endpoints in the absence of a mortality benefit of remdesivir. Nevertheless, these benefits have been demonstrated in only</p>                                                                                                                                                         |                                                     |                                                                           |                                                 |                                            |

|                                      |                                                                                                                                                                                                                                                                                                                                                                                                                                                                                  |
|--------------------------------------|----------------------------------------------------------------------------------------------------------------------------------------------------------------------------------------------------------------------------------------------------------------------------------------------------------------------------------------------------------------------------------------------------------------------------------------------------------------------------------|
|                                      | one randomised trial. The reported benefits are regarded by the panel as modest. The lack of significant adverse effects means that the balance of benefit versus risk was considered marginally in favour of the intervention by some members of the panel but not by others. The panel discussed this topic extensively, and voted on the final recommendation resulting in a majority in favour of a conditional recommendation for both the intervention or the alternative. |
| <b>SUBGROUP CONSIDERATIONS</b>       | Subgroup effects were observed with no benefit on the primary outcome evident in patients requiring invasive mechanical ventilation. As this outcome is the main benefit on which the recommendation is based, the panel considers it appropriate to make a subgroup recommendation against remdesivir use in these patients where no benefit has been demonstrated.                                                                                                             |
| <b>IMPLEMENTATION CONSIDERATIONS</b> | Treatment should be given for 5 days based on evidence that this is at least as effective as 10 days administration.                                                                                                                                                                                                                                                                                                                                                             |
| <b>MONITORING AND EVALUATION</b>     | Liver function tests should be checked prior to administration of remdesivir and checked while patients are on treatment.                                                                                                                                                                                                                                                                                                                                                        |
| <b>RESEARCH PRIORITIES</b>           | As the benefit is unclear, further large studies including endpoints such as clinical improvement, clinical deterioration and length of stay should be performed to confirm the results of ACTT1. Identifying subgroups of patients who benefit is a priority, based on timing of administration and requirement for oxygen for example.                                                                                                                                         |

## PICO 9: Interferon beta

| Domain              | Judgement                                                                                                                                                                   | Research evidence<br>Additional considerations                                                                                                                                                                                                        |
|---------------------|-----------------------------------------------------------------------------------------------------------------------------------------------------------------------------|-------------------------------------------------------------------------------------------------------------------------------------------------------------------------------------------------------------------------------------------------------|
| DESIRABLE EFFECTS   | <p><b>How substantial are the desirable anticipated effects?</b></p> <p>X Trivial</p> <p>○ Small</p> <p>○ Moderate</p> <p>○ Large</p> <p>○ Varies</p> <p>○ Don't know</p>   | <p>Two small trials show large benefits but a trial with a much larger sample size (SOLIDARITY) shows no evidence of benefit and potential harm. The overall interpretation must be no evidence of benefit on mortality or risk of deterioration.</p> |
| UNDESIRABLE EFFECTS | <p><b>How substantial are the undesirable anticipated effects?</b></p> <p>○ Large</p> <p>○ Moderate</p> <p>○ Small</p> <p>○ Trivial</p> <p>○ Varies</p> <p>X Don't know</p> | <p>Safety data are incompletely reported and therefore cannot be properly evaluated.</p>                                                                                                                                                              |

|        |                                                                                                                                                                                                                                                                                                                                                                      |                                                                                                                                                                                                                   |
|--------|----------------------------------------------------------------------------------------------------------------------------------------------------------------------------------------------------------------------------------------------------------------------------------------------------------------------------------------------------------------------|-------------------------------------------------------------------------------------------------------------------------------------------------------------------------------------------------------------------|
|        | <p><b>What is the overall certainty of the evidence of effects?</b></p> <p>X Very low</p> <p>○ Low</p> <p>○ Moderate</p> <p>○ High</p> <p>○ No included studies</p>                                                                                                                                                                                                  | Very low                                                                                                                                                                                                          |
| VALUES | <p><b>Is there important uncertainty about or variability in how much people value the main outcomes?</b></p> <p>○ Important uncertainty or variability</p> <p>○ Possibly important uncertainty or variability</p> <p>○ Probably no important uncertainty or variability</p> <p>X No important uncertainty or variability</p> <p>○ No known undesirable outcomes</p> | <p>Mortality is valued by both patients and clinicians. The only other end point available is clinical deterioration which is also considered highly relevant and rated critical to clinical decision making.</p> |



|                           |                                                                                                                                                                                                                                                                                                                                                                                                                                             |                                                                                                                                                          |
|---------------------------|---------------------------------------------------------------------------------------------------------------------------------------------------------------------------------------------------------------------------------------------------------------------------------------------------------------------------------------------------------------------------------------------------------------------------------------------|----------------------------------------------------------------------------------------------------------------------------------------------------------|
| <p>BALANCE OF EFFECTS</p> | <p><b>Does the balance between desirable and undesirable effects favour the intervention or the alternative?</b></p> <ul style="list-style-type: none"> <li>○ Favours the alternative</li> <li>X Probably favours the alternative</li> <li>○ Does not favour either the intervention or the alternative</li> <li>○ Probably favours the intervention</li> <li>○ Favours the intervention</li> <li>○ Varies</li> <li>○ Don't know</li> </ul> | <p>Unclear, due to lack of safety data and imprecise estimates of benefit.</p>                                                                           |
| <p>RESOURCES REQUIRED</p> | <p><b>How large are the resource requirements (costs)?</b></p> <ul style="list-style-type: none"> <li>○ Large costs</li> <li>○ Moderate costs</li> <li>○ Negligible costs and savings</li> <li>○ Moderate savings</li> <li>○ Large savings</li> <li>○ Varies</li> <li>X Don't know</li> </ul>                                                                                                                                               | <p>None of the studies reported the costs associated with the intervention. In the absence of clinical benefit, it is unlikely to be cost-effective.</p> |

|               |                                                                                                                                                                                                                                                                           |                                                                                                                                                                                                                      |
|---------------|---------------------------------------------------------------------------------------------------------------------------------------------------------------------------------------------------------------------------------------------------------------------------|----------------------------------------------------------------------------------------------------------------------------------------------------------------------------------------------------------------------|
| EQUITY        | <p><b>What would be the impact on health equity?</b></p> <ul style="list-style-type: none"> <li>○ Reduced</li> <li>○ Probably reduced</li> <li>○ Probably no impact</li> <li>○ Probably increased</li> <li>○ Increased</li> <li>○ Varies</li> <li>X Don't know</li> </ul> | Not known.                                                                                                                                                                                                           |
| ACCEPTABILITY | <p><b>Is the intervention acceptable to key stakeholders?</b></p> <ul style="list-style-type: none"> <li>○ No</li> <li>○ Probably no</li> <li>X Probably yes</li> <li>○ Yes</li> <li>○ Varies</li> <li>○ Don't know</li> </ul>                                            | This is a therapy that is used in other indications and is therefore acceptable if it demonstrates clinical benefit. Patients indicate they would be willing to receive such a treatment if it demonstrated benefit. |
| FEASIBILITY   | <p><b>Is the intervention feasible to implement?</b></p> <ul style="list-style-type: none"> <li>○ No</li> <li>○ Probably no</li> <li>○ Probably yes</li> <li>X Yes</li> </ul>                                                                                             | This is an existing therapy that can be delivered in routine clinical practice. Therefore, there are unlikely to be many issues with implementation if it is shown to be an effective treatment.                     |

|  |                                                                                  |  |
|--|----------------------------------------------------------------------------------|--|
|  | <ul style="list-style-type: none"> <li>○ Varies</li> <li>○ Don't know</li> </ul> |  |
|--|----------------------------------------------------------------------------------|--|

| TYPE OF RECOMMENDATION | Strong recommendation against the intervention                                                                                                         | Conditional recommendation against the intervention | Conditional recommendation for either the intervention or the alternative | Conditional recommendation for the intervention | Strong recommendation for the intervention |
|------------------------|--------------------------------------------------------------------------------------------------------------------------------------------------------|-----------------------------------------------------|---------------------------------------------------------------------------|-------------------------------------------------|--------------------------------------------|
|                        | ○                                                                                                                                                      | X                                                   | ○                                                                         | ○                                               | ○                                          |
| RECOMMENDATION         | The panel suggests not to use interferon-β in patients hospitalised with COVID-19 infection (conditional recommendation, very low quality of evidence) |                                                     |                                                                           |                                                 |                                            |
| JUSTIFICATION          | In the absence of clear benefit or safety, a recommendation for use cannot be made.                                                                    |                                                     |                                                                           |                                                 |                                            |

|                                      |                                                                                                                                                                                                                                                                                                                                                                                                                                                                                                                                                                                                              |
|--------------------------------------|--------------------------------------------------------------------------------------------------------------------------------------------------------------------------------------------------------------------------------------------------------------------------------------------------------------------------------------------------------------------------------------------------------------------------------------------------------------------------------------------------------------------------------------------------------------------------------------------------------------|
| <b>SUBGROUP CONSIDERATIONS</b>       | No subgroup effects are reported                                                                                                                                                                                                                                                                                                                                                                                                                                                                                                                                                                             |
| <b>IMPLEMENTATION CONSIDERATIONS</b> | None, the treatment should currently be reserved for use in clinical trials.                                                                                                                                                                                                                                                                                                                                                                                                                                                                                                                                 |
| <b>MONITORING AND EVALUATION</b>     | Not applicable.                                                                                                                                                                                                                                                                                                                                                                                                                                                                                                                                                                                              |
| <b>RESEARCH PRIORITIES</b>           | A recent trial published after the systematic review demonstrated a significant benefit of inhaled interferon beta-1a in 101 patients conducted in the UK ( <a href="https://www.thelancet.com/journals/lanres/article/PIIS2213-2600(20)30511-7/fulltext">https://www.thelancet.com/journals/lanres/article/PIIS2213-2600(20)30511-7/fulltext</a> ). While small trials should be treated with caution, this suggests the possibility that inhaled delivery has a different effect to systemic delivery of interferon. Further studies to investigate the efficacy of inhaled interferon beta are justified. |

## PICO 10: Anticoagulation

| <b>Problem</b><br>Is the problem a priority?                                                                                                          |                                                                                                                                                                                                                                                                                                        |
|-------------------------------------------------------------------------------------------------------------------------------------------------------|--------------------------------------------------------------------------------------------------------------------------------------------------------------------------------------------------------------------------------------------------------------------------------------------------------|
| JUDGEMENT                                                                                                                                             | RESEARCH EVIDENCE                                                                                                                                                                                                                                                                                      |
| <ul style="list-style-type: none"><li>○ No</li><li>○ Probably no</li><li>○ Probably yes</li><li>● Yes</li><li>○ Varies</li><li>○ Don't know</li></ul> | Clinicians and patients regard this question as a priority. Pulmonary embolism and other thrombotic complications have been reported frequently in patients with COVID-19 in hospital. There is wide variation in anticoagulation practice globally.                                                   |
| <b>Desirable Effects</b><br>How substantial are the desirable anticipated effects?                                                                    |                                                                                                                                                                                                                                                                                                        |
| JUDGEMENT                                                                                                                                             | RESEARCH EVIDENCE                                                                                                                                                                                                                                                                                      |
| <ul style="list-style-type: none"><li>○ Trivial</li><li>○ Small</li><li>● Moderate</li><li>○ Large</li><li>○ Varies</li><li>○ Don't know</li></ul>    | <p>We identified no trials of anticoagulation vs no anticoagulation but conducted analysis of high vs low dose anticoagulation.</p> <p>Although no reduction in mortality rate was seen in the trials, there were significant desirable effects noted in the reduction of major thrombotic events.</p> |
| <b>Undesirable Effects</b><br>How substantial are the undesirable anticipated effects?                                                                |                                                                                                                                                                                                                                                                                                        |
| JUDGEMENT                                                                                                                                             | RESEARCH EVIDENCE                                                                                                                                                                                                                                                                                      |

|                                                                                                                                                                                                               |                                                                                                                                                                                                                                  |
|---------------------------------------------------------------------------------------------------------------------------------------------------------------------------------------------------------------|----------------------------------------------------------------------------------------------------------------------------------------------------------------------------------------------------------------------------------|
| <ul style="list-style-type: none"> <li>○ Large</li> <li>● Moderate</li> <li>○ Small</li> <li>○ Trivial</li> <li>○ Varies</li> <li>○ Don't know</li> </ul>                                                     | A significant rise in major bleeds was identified across all five studies                                                                                                                                                        |
| <b>Certainty of evidence</b><br>What is the overall certainty of the evidence of effects?                                                                                                                     |                                                                                                                                                                                                                                  |
| <b>JUDGEMENT</b>                                                                                                                                                                                              | <b>RESEARCH EVIDENCE</b>                                                                                                                                                                                                         |
| <ul style="list-style-type: none"> <li>○ Very low</li> <li>○ Low</li> <li>● Moderate</li> <li>○ High</li> <li>○ No included studies</li> </ul>                                                                | The overall evidence is rated as moderate and high quality using the GRADE framework. Since the update of the guideline the confidence in the evidence has risen due to the availability of robust randomised controlled trials. |
| <b>Values</b><br>Is there important uncertainty about or variability in how much people value the main outcomes?                                                                                              |                                                                                                                                                                                                                                  |
| <b>JUDGEMENT</b>                                                                                                                                                                                              | <b>RESEARCH EVIDENCE</b>                                                                                                                                                                                                         |
| <ul style="list-style-type: none"> <li>○ Important uncertainty or variability</li> <li>○ Possibly important uncertainty or variability</li> <li>○ Probably no important uncertainty or variability</li> </ul> | Outcomes such as mortality are clearly recognised as important by patients and clinicians.                                                                                                                                       |

|                                                                                                                                                                                                                                                                                                                |                                                                                                                                                                                                                                                                                                                         |
|----------------------------------------------------------------------------------------------------------------------------------------------------------------------------------------------------------------------------------------------------------------------------------------------------------------|-------------------------------------------------------------------------------------------------------------------------------------------------------------------------------------------------------------------------------------------------------------------------------------------------------------------------|
| <ul style="list-style-type: none"> <li>• No important uncertainty or variability</li> </ul>                                                                                                                                                                                                                    |                                                                                                                                                                                                                                                                                                                         |
| <b>Balance of effects</b><br>Does the balance between desirable and undesirable effects favor the intervention or the comparison?                                                                                                                                                                              |                                                                                                                                                                                                                                                                                                                         |
| <b>JUDGEMENT</b>                                                                                                                                                                                                                                                                                               | <b>RESEARCH EVIDENCE</b>                                                                                                                                                                                                                                                                                                |
| <ul style="list-style-type: none"> <li>○ Favors the comparison</li> <li>○ Probably favors the comparison</li> <li>• Does not favor either the intervention or the comparison</li> <li>○ Probably favors the intervention</li> <li>○ Favors the intervention</li> <li>○ Varies</li> <li>○ Don't know</li> </ul> | The panel feels that the reduction of thrombotic events with high dose anticoagulation is balanced by the increased risk of major bleeding with therapeutic anticoagulation dosing. Patients at highest risk, such as those with suspected PE, would be anticoagulated as standard and would not be included in trials. |
| <b>Resources required</b><br>How large are the resource requirements (costs)?                                                                                                                                                                                                                                  |                                                                                                                                                                                                                                                                                                                         |
| <b>JUDGEMENT</b>                                                                                                                                                                                                                                                                                               | <b>RESEARCH EVIDENCE</b>                                                                                                                                                                                                                                                                                                |
| <ul style="list-style-type: none"> <li>○ Large costs</li> <li>○ Moderate costs</li> <li>○ Negligible costs and savings</li> <li>• Moderate savings</li> <li>○ Large savings</li> <li>○ Varies</li> <li>○ Don't know</li> </ul>                                                                                 | Although not evaluated in the context of COVID-19, prophylactic anticoagulation is believed to be a cost-effective intervention in hospitalised patients generally, and the panel considers it is likely to be cost-effective in COVID-19 as well.                                                                      |
| <b>Certainty of evidence of required resources</b><br>What is the certainty of the evidence of resource requirements (costs)?                                                                                                                                                                                  |                                                                                                                                                                                                                                                                                                                         |
| <b>JUDGEMENT</b>                                                                                                                                                                                                                                                                                               | <b>RESEARCH EVIDENCE</b>                                                                                                                                                                                                                                                                                                |

|                                                                                                                                                                                                                                                                                                                         |                                                                                                                                                                                                                                                                                                                                                                                        |
|-------------------------------------------------------------------------------------------------------------------------------------------------------------------------------------------------------------------------------------------------------------------------------------------------------------------------|----------------------------------------------------------------------------------------------------------------------------------------------------------------------------------------------------------------------------------------------------------------------------------------------------------------------------------------------------------------------------------------|
| <ul style="list-style-type: none"> <li>○ Very low</li> <li>○ Low</li> <li>● Moderate</li> <li>○ High</li> <li>○ No included studies</li> </ul>                                                                                                                                                                          | <p>Although not formally established in COVID-19, studies on the cost effectiveness of prophylactic anticoagulation have been conducted in other contexts and it has been shown to be a cost-effective measure.</p>                                                                                                                                                                    |
| <b>Cost effectiveness</b><br>Does the cost-effectiveness of the intervention favor the intervention or the comparison?                                                                                                                                                                                                  |                                                                                                                                                                                                                                                                                                                                                                                        |
| <b>JUDGEMENT</b>                                                                                                                                                                                                                                                                                                        | <b>RESEARCH EVIDENCE</b>                                                                                                                                                                                                                                                                                                                                                               |
| <ul style="list-style-type: none"> <li>○ Favors the comparison</li> <li>○ Probably favors the comparison</li> <li>○ Does not favor either the intervention or the comparison</li> <li>● Probably favors the intervention</li> <li>○ Favors the intervention</li> <li>○ Varies</li> <li>○ No included studies</li> </ul> | <p>Although no specific data are available in COVID-19, it is highly likely that anticoagulation is cost-effective. It is also highly likely that performing future trials would not be regarded as ethical if comparing anticoagulation with no anticoagulation.</p> <p>The cost effectiveness of therapeutic dose vs prophylactic dose anticoagulation has not been established.</p> |
| <b>Equity</b><br>What would be the impact on health equity?                                                                                                                                                                                                                                                             |                                                                                                                                                                                                                                                                                                                                                                                        |
| <b>JUDGEMENT</b>                                                                                                                                                                                                                                                                                                        | <b>RESEARCH EVIDENCE</b>                                                                                                                                                                                                                                                                                                                                                               |
| <ul style="list-style-type: none"> <li>○ Reduced</li> <li>○ Probably reduced</li> <li>● Probably no impact</li> </ul>                                                                                                                                                                                                   | <p>None</p>                                                                                                                                                                                                                                                                                                                                                                            |



|                                                                                                                                                              |                                                                                                                                                                                     |
|--------------------------------------------------------------------------------------------------------------------------------------------------------------|-------------------------------------------------------------------------------------------------------------------------------------------------------------------------------------|
| <ul style="list-style-type: none"> <li>○ Probably increased</li> <li>○ Increased</li> <li>○ Varies</li> <li>○ Don't know</li> </ul>                          |                                                                                                                                                                                     |
| <b>Acceptability</b><br>Is the intervention acceptable to key stakeholders?                                                                                  |                                                                                                                                                                                     |
| <b>JUDGEMENT</b>                                                                                                                                             | <b>RESEARCH EVIDENCE</b>                                                                                                                                                            |
| <ul style="list-style-type: none"> <li>○ No</li> <li>○ Probably no</li> <li>○ Probably yes</li> <li>● Yes</li> <li>○ Varies</li> <li>○ Don't know</li> </ul> | Anticoagulation is widely used in hospitalised patients and is both available and acceptable.                                                                                       |
| <b>Feasibility</b><br>Is the intervention feasible to implement?                                                                                             |                                                                                                                                                                                     |
| <b>JUDGEMENT</b>                                                                                                                                             | <b>RESEARCH EVIDENCE</b>                                                                                                                                                            |
| <ul style="list-style-type: none"> <li>○ No</li> <li>○ Probably no</li> <li>○ Probably yes</li> <li>● Yes</li> <li>○ Varies</li> <li>○ Don't know</li> </ul> | Yes, the intervention of prophylactic anticoagulation is widely used in hospitalised patients worldwide. The patient representative confirmed that this was acceptable to patients. |

## TYPE OF RECOMMENDATION

|                                                |                                                     |                                                                          |                                                 |                                            |
|------------------------------------------------|-----------------------------------------------------|--------------------------------------------------------------------------|-------------------------------------------------|--------------------------------------------|
| Strong recommendation against the intervention | Conditional recommendation against the intervention | Conditional recommendation for either the intervention or the comparison | Conditional recommendation for the intervention | Strong recommendation for the intervention |
|------------------------------------------------|-----------------------------------------------------|--------------------------------------------------------------------------|-------------------------------------------------|--------------------------------------------|

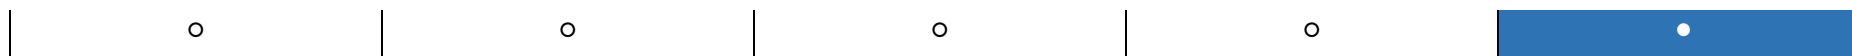

## CONCLUSIONS

### Recommendation

The panel recommends offering a form of anticoagulation to hospitalised patients with COVID-19 (Strong recommendation, Moderate quality of evidence)

### Justification

Although the amount of evidence is limited, prophylactic anticoagulation is routine practice for hospitalised patients at risk of thromboembolic complications in hospitals in many countries and the existing evidence and existing practice makes this an intervention that can be strongly advocated.

As per the original guideline, we are unable to determine whether prophylactic vs therapeutic dose anticoagulation is superior and therefore, rather than recommending one or the other, we make clear that this is a matter for clinical judgement where clinicians may select one or the other depending on the individual risks of the individual for thrombotic complications vs bleeding complications.

### Subgroup considerations

No subgroup analyses were completed.

### Implementation considerations

As this is widely used and inexpensive, implementation should be straightforward

### Monitoring and evaluation

## Research priorities

Since therapeutic anticoagulation appears to be beneficial in some patient groups but not in others, we recommend studies to determine whether biomarkers of other clinical markers can identify patients likely to experience a mortality benefit from therapeutic anticoagulation.

## PICO 11a: CPAP strategies

| <b>Problem</b><br>Is the problem a priority?                                                                                                          |                                                                                                                                                                                                                                                                                                                                                           |
|-------------------------------------------------------------------------------------------------------------------------------------------------------|-----------------------------------------------------------------------------------------------------------------------------------------------------------------------------------------------------------------------------------------------------------------------------------------------------------------------------------------------------------|
| JUDGEMENT                                                                                                                                             | RESEARCH EVIDENCE                                                                                                                                                                                                                                                                                                                                         |
| <ul style="list-style-type: none"><li>○ No</li><li>○ Probably no</li><li>○ Probably yes</li><li>● Yes</li><li>○ Varies</li><li>○ Don't know</li></ul> | Yes. Avoiding invasive mechanical ventilation is highly desirable and there is evidence in other contexts that this can be achieved through the use of non-invasive ventilation. CPAP is widely used and therefore evidence is required to support its use and understand the risks and benefits.                                                         |
| <b>Desirable Effects</b><br>How substantial are the desirable anticipated effects?                                                                    |                                                                                                                                                                                                                                                                                                                                                           |
| JUDGEMENT                                                                                                                                             | RESEARCH EVIDENCE                                                                                                                                                                                                                                                                                                                                         |
| <ul style="list-style-type: none"><li>○ Trivial</li><li>○ Small</li><li>● Moderate</li><li>○ Large</li><li>○ Varies</li><li>○ Don't know</li></ul>    | Substantial significant reductions in the need for admission to critical care, tracheal intubation and need for further mechanical ventilation were seen in patients treated with CPAP therapy in the RECOVERY-RS randomised trial. Reductions in length of hospital stay were also seen but no clinically meaningful reductions on mortality were noted. |
| <b>Undesirable Effects</b><br>How substantial are the undesirable anticipated effects?                                                                |                                                                                                                                                                                                                                                                                                                                                           |
| JUDGEMENT                                                                                                                                             | RESEARCH EVIDENCE                                                                                                                                                                                                                                                                                                                                         |

|                                                                                                                                                           |                                                                                                                                                                                                                                                                                                                                                                                                                                                      |
|-----------------------------------------------------------------------------------------------------------------------------------------------------------|------------------------------------------------------------------------------------------------------------------------------------------------------------------------------------------------------------------------------------------------------------------------------------------------------------------------------------------------------------------------------------------------------------------------------------------------------|
| <ul style="list-style-type: none"> <li>○ Large</li> <li>● Moderate</li> <li>○ Small</li> <li>○ Trivial</li> <li>○ Varies</li> <li>○ Don't know</li> </ul> | <p>The most commonly reported adverse event was hemodynamic instability in 43 patients (11.3%) followed by cutaneous pressure sores (8.8%) and oronasal dryness (6.4%).</p> <p>Four of seven SAE's were classified as probably or possibly linked to CPAP which involved one case of surgical emphysema and pneumomediastinum, two cases of pneumothorax and pneumomediastinum and one case of vomiting requiring emergency tracheal intubation.</p> |
|-----------------------------------------------------------------------------------------------------------------------------------------------------------|------------------------------------------------------------------------------------------------------------------------------------------------------------------------------------------------------------------------------------------------------------------------------------------------------------------------------------------------------------------------------------------------------------------------------------------------------|

## Certainty of evidence

What is the overall certainty of the evidence of effects?

| JUDGEMENT                                                                                                                                      | RESEARCH EVIDENCE                                                                                                                                                                                                                                                                                          |
|------------------------------------------------------------------------------------------------------------------------------------------------|------------------------------------------------------------------------------------------------------------------------------------------------------------------------------------------------------------------------------------------------------------------------------------------------------------|
| <ul style="list-style-type: none"> <li>○ Very low</li> <li>○ Low</li> <li>● Moderate</li> <li>○ High</li> <li>○ No included studies</li> </ul> | <p>The RECOVERY_RS trial is a well conducted randomised controlled trial providing high quality of evidence for the majority of pre-specified endpoints. There is only one randomised controlled trial, however, which suggests repeating more trials would further improve the certainty of evidence.</p> |

## Values

Is there important uncertainty about or variability in how much people value the main outcomes?

| JUDGEMENT                                                                                                                                                                                                     | RESEARCH EVIDENCE                                                                                                |
|---------------------------------------------------------------------------------------------------------------------------------------------------------------------------------------------------------------|------------------------------------------------------------------------------------------------------------------|
| <ul style="list-style-type: none"> <li>○ Important uncertainty or variability</li> <li>○ Possibly important uncertainty or variability</li> <li>○ Probably no important uncertainty or variability</li> </ul> | <p>The outcomes were all rated important or critical by the task force including the patient representative.</p> |

|                                                                                                                                                                                                                                                                                                                |                                                                                                                                                                                                                                                                                                                                                                                       |
|----------------------------------------------------------------------------------------------------------------------------------------------------------------------------------------------------------------------------------------------------------------------------------------------------------------|---------------------------------------------------------------------------------------------------------------------------------------------------------------------------------------------------------------------------------------------------------------------------------------------------------------------------------------------------------------------------------------|
| <ul style="list-style-type: none"> <li>• No important uncertainty or variability</li> </ul>                                                                                                                                                                                                                    |                                                                                                                                                                                                                                                                                                                                                                                       |
| <b>Balance of effects</b><br>Does the balance between desirable and undesirable effects favor the intervention or the comparison?                                                                                                                                                                              |                                                                                                                                                                                                                                                                                                                                                                                       |
| <b>JUDGEMENT</b>                                                                                                                                                                                                                                                                                               | <b>RESEARCH EVIDENCE</b>                                                                                                                                                                                                                                                                                                                                                              |
| <ul style="list-style-type: none"> <li>○ Favors the comparison</li> <li>○ Probably favors the comparison</li> <li>○ Does not favor either the intervention or the comparison</li> <li>• Probably favors the intervention</li> <li>○ Favors the intervention</li> <li>○ Varies</li> <li>○ Don't know</li> </ul> | Statistically significant improvements have been found in critical outcomes following the use of CPAP. The risks associated with the treatment are minimal and therefore are likely to be outweighed by the benefits.                                                                                                                                                                 |
| <b>Resources required</b><br>How large are the resource requirements (costs)?                                                                                                                                                                                                                                  |                                                                                                                                                                                                                                                                                                                                                                                       |
| <b>JUDGEMENT</b>                                                                                                                                                                                                                                                                                               | <b>RESEARCH EVIDENCE</b>                                                                                                                                                                                                                                                                                                                                                              |
| <ul style="list-style-type: none"> <li>○ Large costs</li> <li>○ Moderate costs</li> <li>○ Negligible costs and savings</li> <li>○ Moderate savings</li> <li>○ Large savings</li> <li>○ Varies</li> <li>• Don't know</li> </ul>                                                                                 | This has not been formally established, but ICU care and subsequent rehabilitation is expensive and therefore an intervention that reduces the requirement for intensive care may be associated with significant cost savings. As the magnitude of benefit associated with HFNO and non-invasive CPAP have not been clearly established, any comment on relative costs is speculative |
| <b>Certainty of evidence of required resources</b><br>What is the certainty of the evidence of resource requirements (costs)?                                                                                                                                                                                  |                                                                                                                                                                                                                                                                                                                                                                                       |
| <b>JUDGEMENT</b>                                                                                                                                                                                                                                                                                               | <b>RESEARCH EVIDENCE</b>                                                                                                                                                                                                                                                                                                                                                              |

|                                                                                                                                                                                                                                                                                                                         |                                                                                                                                                                                                                                                                                                                                                                                                                                                                                                                       |
|-------------------------------------------------------------------------------------------------------------------------------------------------------------------------------------------------------------------------------------------------------------------------------------------------------------------------|-----------------------------------------------------------------------------------------------------------------------------------------------------------------------------------------------------------------------------------------------------------------------------------------------------------------------------------------------------------------------------------------------------------------------------------------------------------------------------------------------------------------------|
| <ul style="list-style-type: none"> <li>○ Very low</li> <li>○ Low</li> <li>○ Moderate</li> <li>○ High</li> <li>● No included studies</li> </ul>                                                                                                                                                                          | <p>We did not identify any formal studies of resource use or cost-effectiveness.</p>                                                                                                                                                                                                                                                                                                                                                                                                                                  |
| <b>Cost effectiveness</b><br>Does the cost-effectiveness of the intervention favor the intervention or the comparison?                                                                                                                                                                                                  |                                                                                                                                                                                                                                                                                                                                                                                                                                                                                                                       |
| <b>JUDGEMENT</b>                                                                                                                                                                                                                                                                                                        | <b>RESEARCH EVIDENCE</b>                                                                                                                                                                                                                                                                                                                                                                                                                                                                                              |
| <ul style="list-style-type: none"> <li>○ Favors the comparison</li> <li>○ Probably favors the comparison</li> <li>○ Does not favor either the intervention or the comparison</li> <li>● Probably favors the intervention</li> <li>○ Favors the intervention</li> <li>○ Varies</li> <li>○ No included studies</li> </ul> | <p>We did not identify any formal studies of resource use or cost-effectiveness. It is likely that the reduction in ICU and mechanical ventilation requirements would be make CPAP cost-effective.</p>                                                                                                                                                                                                                                                                                                                |
| <b>Equity</b><br>What would be the impact on health equity?                                                                                                                                                                                                                                                             |                                                                                                                                                                                                                                                                                                                                                                                                                                                                                                                       |
| <b>JUDGEMENT</b>                                                                                                                                                                                                                                                                                                        | <b>RESEARCH EVIDENCE</b>                                                                                                                                                                                                                                                                                                                                                                                                                                                                                              |
| <ul style="list-style-type: none"> <li>○ Reduced</li> <li>○ Probably reduced</li> <li>○ Probably no impact</li> </ul>                                                                                                                                                                                                   | <p>ICU beds are highly limited in most countries worldwide and ICU capacity was strained in many countries particularly during the pandemic leading to rationing of resources. The use of non-invasive CPAP can be conducted outside of an ICU environment in many countries which allows this intervention to be offered to a large number of people and also to populations who may otherwise have contraindications to invasive mechanical ventilation, which may have the effect of increasing health equity.</p> |

|                                                                                                                                                              |                                                                                                                                                                                                                                                                                                                                                 |
|--------------------------------------------------------------------------------------------------------------------------------------------------------------|-------------------------------------------------------------------------------------------------------------------------------------------------------------------------------------------------------------------------------------------------------------------------------------------------------------------------------------------------|
| <ul style="list-style-type: none"> <li>● Probably increased</li> <li>○ Increased</li> <li>○ Varies</li> <li>○ Don't know</li> </ul>                          |                                                                                                                                                                                                                                                                                                                                                 |
| <b>Acceptability</b><br>Is the intervention acceptable to key stakeholders?                                                                                  |                                                                                                                                                                                                                                                                                                                                                 |
| <b>JUDGEMENT</b>                                                                                                                                             | <b>RESEARCH EVIDENCE</b>                                                                                                                                                                                                                                                                                                                        |
| <ul style="list-style-type: none"> <li>○ No</li> <li>○ Probably no</li> <li>● Probably yes</li> <li>○ Yes</li> <li>○ Varies</li> <li>○ Don't know</li> </ul> | Non-invasive CPAP is widely used. The main issue around acceptability is the aerosol generating nature of the intervention which puts staff and other patients at risk of infection with SARS-CoV-2. The intervention is therefore only acceptable when delivered in an appropriate environment with appropriate personal protective equipment. |
| <b>Feasibility</b><br>Is the intervention feasible to implement?                                                                                             |                                                                                                                                                                                                                                                                                                                                                 |
| <b>JUDGEMENT</b>                                                                                                                                             | <b>RESEARCH EVIDENCE</b>                                                                                                                                                                                                                                                                                                                        |
| <ul style="list-style-type: none"> <li>○ No</li> <li>○ Probably no</li> <li>○ Probably yes</li> <li>● Yes</li> <li>○ Varies</li> <li>○ Don't know</li> </ul> | The therapy is already available in hospital and therefore should cause no issues in implementing. The main feasibility issue is around the appropriate environment, trained nursing resources and personal protective equipment to deliver the interventions.                                                                                  |

## TYPE OF RECOMMENDATION

|                                                |                                                     |                                                                          |                                                        |                                            |
|------------------------------------------------|-----------------------------------------------------|--------------------------------------------------------------------------|--------------------------------------------------------|--------------------------------------------|
| Strong recommendation against the intervention | Conditional recommendation against the intervention | Conditional recommendation for either the intervention or the comparison | <b>Conditional recommendation for the intervention</b> | Strong recommendation for the intervention |
|------------------------------------------------|-----------------------------------------------------|--------------------------------------------------------------------------|--------------------------------------------------------|--------------------------------------------|



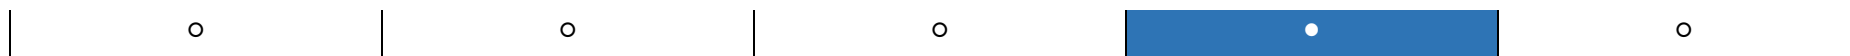

## CONCLUSIONS

### Recommendation

We suggest non-invasive CPAP delivered through either a helmet or a face-mask for patients with COVID-19 and hypoxaemic acute respiratory failure (conditional recommendation, high quality of evidence)

Notes accompanying this recommendation: HFNO and non-invasive CPAP are classified as aerosol generating and should therefore be delivered in a safe environment with staff wearing appropriate personal protecting equipment

Non-invasive CPAP should not delay mechanical ventilation in patients who are not responding to treatment. Prone positioning may improve oxygenation in non-intubated patient with acute hypoxaemic respiratory failure and is widely used for mechanically ventilated patients with COVID-19.

### Justification

This is based on a significant reduction in mechanical ventilation requirement and ICU admission while acknowledging the studies did not identify a significant effect on mortality. The balance of risks and benefits favour the intervention.

### Subgroup considerations

No subgroup considerations analysed

### Implementation considerations

### Monitoring and evaluation

Patients should be cared for in an environment with staff experienced in delivering HFNO or non-invasive CPAP with continuous monitoring of the patients' condition. In patients not responding to non-invasive ventilation it is important that this is recognised promptly, and invasive ventilation is not delayed.

## Research priorities

Further trials to identify the optimal method and duration of non-invasive respiratory support are required.

## PICO 11b: HFNO strategies

| <b>Problem</b><br>Is the problem a priority?                                                                                                          |                                                                                                                                                                                                                                           |
|-------------------------------------------------------------------------------------------------------------------------------------------------------|-------------------------------------------------------------------------------------------------------------------------------------------------------------------------------------------------------------------------------------------|
| JUDGEMENT                                                                                                                                             | RESEARCH EVIDENCE                                                                                                                                                                                                                         |
| <ul style="list-style-type: none"><li>○ No</li><li>○ Probably no</li><li>○ Probably yes</li><li>● Yes</li><li>○ Varies</li><li>○ Don't know</li></ul> | Avoiding invasive mechanical ventilation is highly desirable and there is evidence in other contexts that this can be achieved through the use of high flow oxygen.                                                                       |
| <b>Desirable Effects</b><br>How substantial are the desirable anticipated effects?                                                                    |                                                                                                                                                                                                                                           |
| JUDGEMENT                                                                                                                                             | RESEARCH EVIDENCE                                                                                                                                                                                                                         |
| <ul style="list-style-type: none"><li>● Trivial</li><li>○ Small</li><li>○ Moderate</li><li>○ Large</li><li>○ Varies</li><li>○ Don't know</li></ul>    | No clinically meaningful results were observed for any outcomes following the use of HFNO. The power of the study excludes a large effect but cannot exclude smaller effects. Any effects are likely to be of limited clinical relevance. |
| <b>Undesirable Effects</b><br>How substantial are the undesirable anticipated effects?                                                                |                                                                                                                                                                                                                                           |
| JUDGEMENT                                                                                                                                             | RESEARCH EVIDENCE                                                                                                                                                                                                                         |

|                                                                                                                                                           |                                                                                                                                                                                                                                                                               |
|-----------------------------------------------------------------------------------------------------------------------------------------------------------|-------------------------------------------------------------------------------------------------------------------------------------------------------------------------------------------------------------------------------------------------------------------------------|
| <ul style="list-style-type: none"> <li>○ Large</li> <li>○ Moderate</li> <li>● Small</li> <li>○ Trivial</li> <li>○ Varies</li> <li>○ Don't know</li> </ul> | <p>Adverse events were reported from only one study (RECOVERY-RS). No serious AE's were recorded in the intervention arm and the main three adverse events recorded were haemodynamic instability in 36 patients (8.6%), oronasal dryness (6%) and claustrophobia (3.8%).</p> |
|-----------------------------------------------------------------------------------------------------------------------------------------------------------|-------------------------------------------------------------------------------------------------------------------------------------------------------------------------------------------------------------------------------------------------------------------------------|

## Certainty of evidence

What is the overall certainty of the evidence of effects?

| JUDGEMENT                                                                                                                                      | RESEARCH EVIDENCE                                                                                                                                                                        |
|------------------------------------------------------------------------------------------------------------------------------------------------|------------------------------------------------------------------------------------------------------------------------------------------------------------------------------------------|
| <ul style="list-style-type: none"> <li>○ Very low</li> <li>○ Low</li> <li>○ Moderate</li> <li>● High</li> <li>○ No included studies</li> </ul> | <p>Despite only three randomised controlled trials of HFNO being identified, the certainty of evidence is high due to well controlled/designed studies with good number of patients.</p> |

## Values

Is there important uncertainty about or variability in how much people value the main outcomes?

| JUDGEMENT                                                                                                                                                                                                     | RESEARCH EVIDENCE                                                                                                   |
|---------------------------------------------------------------------------------------------------------------------------------------------------------------------------------------------------------------|---------------------------------------------------------------------------------------------------------------------|
| <ul style="list-style-type: none"> <li>○ Important uncertainty or variability</li> <li>○ Possibly important uncertainty or variability</li> <li>○ Probably no important uncertainty or variability</li> </ul> | <p>No important uncertainty, all outcomes were decided as important or critical from all the taskforce members.</p> |

|                                                                                                                                                                                                                                                                                                                |                                                                                                                                                                                                                                                                                                                                                                                                                                    |
|----------------------------------------------------------------------------------------------------------------------------------------------------------------------------------------------------------------------------------------------------------------------------------------------------------------|------------------------------------------------------------------------------------------------------------------------------------------------------------------------------------------------------------------------------------------------------------------------------------------------------------------------------------------------------------------------------------------------------------------------------------|
| <ul style="list-style-type: none"> <li>• No important uncertainty or variability</li> </ul>                                                                                                                                                                                                                    |                                                                                                                                                                                                                                                                                                                                                                                                                                    |
| <b>Balance of effects</b><br>Does the balance between desirable and undesirable effects favor the intervention or the comparison?                                                                                                                                                                              |                                                                                                                                                                                                                                                                                                                                                                                                                                    |
| <b>JUDGEMENT</b>                                                                                                                                                                                                                                                                                               | <b>RESEARCH EVIDENCE</b>                                                                                                                                                                                                                                                                                                                                                                                                           |
| <ul style="list-style-type: none"> <li>○ Favors the comparison</li> <li>• Probably favors the comparison</li> <li>○ Does not favor either the intervention or the comparison</li> <li>○ Probably favors the intervention</li> <li>○ Favors the intervention</li> <li>○ Varies</li> <li>○ Don't know</li> </ul> | <p>No overall differences were seen in any of the critical outcomes. Due to the trend towards reduced length of hospital stay and serious adverse events, HFNO may be better tolerated for those who cannot tolerate CPAP. Evidence in other diseases suggest that HFNO can be beneficial, therefore on balance the panel feels that there may be a benefit in patients who are unable to tolerate or are unsuitable for CPAP.</p> |
| <b>Resources required</b><br>How large are the resource requirements (costs)?                                                                                                                                                                                                                                  |                                                                                                                                                                                                                                                                                                                                                                                                                                    |
| <b>JUDGEMENT</b>                                                                                                                                                                                                                                                                                               | <b>RESEARCH EVIDENCE</b>                                                                                                                                                                                                                                                                                                                                                                                                           |
| <ul style="list-style-type: none"> <li>○ Large costs</li> <li>○ Moderate costs</li> <li>○ Negligible costs and savings</li> <li>○ Moderate savings</li> <li>○ Large savings</li> <li>○ Varies</li> <li>• Don't know</li> </ul>                                                                                 | <p>This has not been formally established, but ICU care and subsequent rehabilitation is expensive and therefore an intervention that reduces the requirement for intensive care may be associated with significant cost savings. As the magnitude of benefit associated with HFNO has not been clearly established, any comment on relative costs is speculative.</p>                                                             |
| <b>Certainty of evidence of required resources</b><br>What is the certainty of the evidence of resource requirements (costs)?                                                                                                                                                                                  |                                                                                                                                                                                                                                                                                                                                                                                                                                    |
| <b>JUDGEMENT</b>                                                                                                                                                                                                                                                                                               | <b>RESEARCH EVIDENCE</b>                                                                                                                                                                                                                                                                                                                                                                                                           |

|                                                                                                                                                                                                                                                                                                                         |                                                                                                                                                                                |
|-------------------------------------------------------------------------------------------------------------------------------------------------------------------------------------------------------------------------------------------------------------------------------------------------------------------------|--------------------------------------------------------------------------------------------------------------------------------------------------------------------------------|
| <ul style="list-style-type: none"> <li>○ Very low</li> <li>○ Low</li> <li>● Moderate</li> <li>○ High</li> <li>○ No included studies</li> </ul>                                                                                                                                                                          | <p>Delivery of care for patient requiring high flow nasal oxygen treatment is expensive but likely less expensive than the alternative of invasive mechanical ventilation.</p> |
| <b>Cost effectiveness</b><br>Does the cost-effectiveness of the intervention favor the intervention or the comparison?                                                                                                                                                                                                  |                                                                                                                                                                                |
| <b>JUDGEMENT</b>                                                                                                                                                                                                                                                                                                        | <b>RESEARCH EVIDENCE</b>                                                                                                                                                       |
| <ul style="list-style-type: none"> <li>○ Favors the comparison</li> <li>○ Probably favors the comparison</li> <li>● Does not favor either the intervention or the comparison</li> <li>○ Probably favors the intervention</li> <li>○ Favors the intervention</li> <li>○ Varies</li> <li>○ No included studies</li> </ul> | <p>Hard to quantify cost effectiveness due to the lack of clear evidence of clinical benefit of HFNO over conventional oxygen therapy.</p>                                     |
| <b>Equity</b><br>What would be the impact on health equity?                                                                                                                                                                                                                                                             |                                                                                                                                                                                |
| <b>JUDGEMENT</b>                                                                                                                                                                                                                                                                                                        | <b>RESEARCH EVIDENCE</b>                                                                                                                                                       |
| <ul style="list-style-type: none"> <li>○ Reduced</li> <li>○ Probably reduced</li> <li>○ Probably no impact</li> </ul>                                                                                                                                                                                                   | <p>The treatment is relatively easy to administer and is therefore likely to be acceptable.</p>                                                                                |

|                                                                                                                                                              |                                                                                                                                                                                                                                                                |
|--------------------------------------------------------------------------------------------------------------------------------------------------------------|----------------------------------------------------------------------------------------------------------------------------------------------------------------------------------------------------------------------------------------------------------------|
| <ul style="list-style-type: none"> <li>• Probably increased</li> <li>○ Increased</li> <li>○ Varies</li> <li>○ Don't know</li> </ul>                          |                                                                                                                                                                                                                                                                |
| <b>Acceptability</b><br>Is the intervention acceptable to key stakeholders?                                                                                  |                                                                                                                                                                                                                                                                |
| <b>JUDGEMENT</b>                                                                                                                                             | <b>RESEARCH EVIDENCE</b>                                                                                                                                                                                                                                       |
| <ul style="list-style-type: none"> <li>○ No</li> <li>○ Probably no</li> <li>• Probably yes</li> <li>○ Yes</li> <li>○ Varies</li> <li>○ Don't know</li> </ul> | The treatment is relatively easy to administer.                                                                                                                                                                                                                |
| <b>Feasibility</b><br>Is the intervention feasible to implement?                                                                                             |                                                                                                                                                                                                                                                                |
| <b>JUDGEMENT</b>                                                                                                                                             | <b>RESEARCH EVIDENCE</b>                                                                                                                                                                                                                                       |
| <ul style="list-style-type: none"> <li>○ No</li> <li>○ Probably no</li> <li>○ Probably yes</li> <li>• Yes</li> <li>○ Varies</li> <li>○ Don't know</li> </ul> | The therapy is already available in hospital and therefore should cause no issues in implementing. The main feasibility issue is around the appropriate environment, trained nursing resources and personal protective equipment to deliver the interventions. |

## TYPE OF RECOMMENDATION

|                                                |                                                     |                                                                          |                                                 |                                            |
|------------------------------------------------|-----------------------------------------------------|--------------------------------------------------------------------------|-------------------------------------------------|--------------------------------------------|
| Strong recommendation against the intervention | Conditional recommendation against the intervention | Conditional recommendation for either the intervention or the comparison | Conditional recommendation for the intervention | Strong recommendation for the intervention |
|------------------------------------------------|-----------------------------------------------------|--------------------------------------------------------------------------|-------------------------------------------------|--------------------------------------------|

|   |   |   |   |   |
|---|---|---|---|---|
| ○ | ○ | ○ | ● | ○ |
|---|---|---|---|---|

## CONCLUSIONS

### Recommendation

Consider high flow nasal oxygen therapy in patients without an immediate need for invasive mechanical intubation and who are unsuitable for continuous positive airway pressure due to intolerance or adverse effects (conditional recommendation, moderate quality of evidence)

### Justification

No benefits for the use of HFNO were identified in the prespecified outcomes however the therapy may benefit those who cannot tolerate CPAP and help reduce the burden of endotracheal intubation based on clinical experience.

### Subgroup considerations

No subgroups were prespecified

### Implementation considerations

HFNO is considered as an aerosol generating procedure and should therefore be delivered in a safe environment with staff wearing appropriate personal protecting equipment

### Monitoring and evaluation



Patients should be cared for in an environment with staff experienced in delivering HFNO with continuous monitoring of the patients' condition. In patients not responding to HFNO it is important that this is recognised promptly, and invasive ventilation is not delayed

## Research priorities

None

## PICO Question 12 – Convalescent plasma strategies

| <b>Problem</b><br>Is the problem a priority?                                                                                                          |                                                                                                                                                                                                                                                                                                                                                                                                                              |
|-------------------------------------------------------------------------------------------------------------------------------------------------------|------------------------------------------------------------------------------------------------------------------------------------------------------------------------------------------------------------------------------------------------------------------------------------------------------------------------------------------------------------------------------------------------------------------------------|
| JUDGEMENT                                                                                                                                             | RESEARCH EVIDENCE                                                                                                                                                                                                                                                                                                                                                                                                            |
| <ul style="list-style-type: none"><li>○ No</li><li>○ Probably no</li><li>○ Probably yes</li><li>● Yes</li><li>○ Varies</li><li>○ Don't know</li></ul> | Convalescent plasma was widely used worldwide as a treatment for COVID-19 and observational studies have reported large benefits. Therefore, robust evidence on the risks and benefits are required in order to inform clinical practice.                                                                                                                                                                                    |
| <b>Desirable Effects</b><br>How substantial are the desirable anticipated effects?                                                                    |                                                                                                                                                                                                                                                                                                                                                                                                                              |
| JUDGEMENT                                                                                                                                             | RESEARCH EVIDENCE                                                                                                                                                                                                                                                                                                                                                                                                            |
| <ul style="list-style-type: none"><li>● Trivial</li><li>○ Small</li><li>○ Moderate</li><li>○ Large</li><li>○ Varies</li><li>○ Don't know</li></ul>    | The only benefit to be noted from our meta-analysis of outcomes with convalescent plasma was conversion of the RT-PCR for SARS-CoV-2 virus to negative (OR2.32, CI1.57-3.45) however this outcome was deemed important with none of the critical outcomes showing any treatment response. In particular there is convincing evidence that convalescent plasma does not provide a mortality benefit or prevent deterioration. |
| <b>Undesirable Effects</b><br>How substantial are the undesirable anticipated effects?                                                                |                                                                                                                                                                                                                                                                                                                                                                                                                              |
| JUDGEMENT                                                                                                                                             | RESEARCH EVIDENCE                                                                                                                                                                                                                                                                                                                                                                                                            |

|                                                                                                                                                           |                                                                                                           |
|-----------------------------------------------------------------------------------------------------------------------------------------------------------|-----------------------------------------------------------------------------------------------------------|
| <ul style="list-style-type: none"> <li>○ Large</li> <li>● Moderate</li> <li>○ Small</li> <li>○ Trivial</li> <li>○ Varies</li> <li>○ Don't know</li> </ul> | The majority of outcomes showed no treatment effect however there was an increase in the number of SAE's. |
|-----------------------------------------------------------------------------------------------------------------------------------------------------------|-----------------------------------------------------------------------------------------------------------|

## Certainty of evidence

What is the overall certainty of the evidence of effects?

| JUDGEMENT                                                                                                                                      | RESEARCH EVIDENCE                                                                                                                                                                                                                                                                                                         |
|------------------------------------------------------------------------------------------------------------------------------------------------|---------------------------------------------------------------------------------------------------------------------------------------------------------------------------------------------------------------------------------------------------------------------------------------------------------------------------|
| <ul style="list-style-type: none"> <li>○ Very low</li> <li>○ Low</li> <li>○ Moderate</li> <li>● High</li> <li>○ No included studies</li> </ul> | Although the quality of included trials and the sample sizes were variable, when the body of evidence as a whole are considered there is clear evidence that plasma therapy does not improve clinical outcomes and a high degree of certainty that if further trials were performed they would reach similar conclusions. |

## Values

Is there important uncertainty about or variability in how much people value the main outcomes?

| JUDGEMENT                                                                                                                                                                                                     | RESEARCH EVIDENCE                                                           |
|---------------------------------------------------------------------------------------------------------------------------------------------------------------------------------------------------------------|-----------------------------------------------------------------------------|
| <ul style="list-style-type: none"> <li>○ Important uncertainty or variability</li> <li>○ Possibly important uncertainty or variability</li> <li>○ Probably no important uncertainty or variability</li> </ul> | All outcomes were deemed important or critical by all members of the panel. |

|                                                                                                                                                                                                                                                                                                                |                                                                                                                                                                                                                             |
|----------------------------------------------------------------------------------------------------------------------------------------------------------------------------------------------------------------------------------------------------------------------------------------------------------------|-----------------------------------------------------------------------------------------------------------------------------------------------------------------------------------------------------------------------------|
| <ul style="list-style-type: none"> <li>• No important uncertainty or variability</li> </ul>                                                                                                                                                                                                                    |                                                                                                                                                                                                                             |
| <b>Balance of effects</b><br>Does the balance between desirable and undesirable effects favor the intervention or the comparison?                                                                                                                                                                              |                                                                                                                                                                                                                             |
| <b>JUDGEMENT</b>                                                                                                                                                                                                                                                                                               | <b>RESEARCH EVIDENCE</b>                                                                                                                                                                                                    |
| <ul style="list-style-type: none"> <li>• Favors the comparison</li> <li>◦ Probably favors the comparison</li> <li>◦ Does not favor either the intervention or the comparison</li> <li>◦ Probably favors the intervention</li> <li>◦ Favors the intervention</li> <li>◦ Varies</li> <li>◦ Don't know</li> </ul> | No desirable effects were seen from the use of this treatment.                                                                                                                                                              |
| <b>Resources required</b><br>How large are the resource requirements (costs)?                                                                                                                                                                                                                                  |                                                                                                                                                                                                                             |
| <b>JUDGEMENT</b>                                                                                                                                                                                                                                                                                               | <b>RESEARCH EVIDENCE</b>                                                                                                                                                                                                    |
| <ul style="list-style-type: none"> <li>◦ Large costs</li> <li>• Moderate costs</li> <li>◦ Negligible costs and savings</li> <li>◦ Moderate savings</li> <li>◦ Large savings</li> <li>◦ Varies</li> <li>◦ Don't know</li> </ul>                                                                                 | Collection of plasma, storage and administration are not without their resource requirements. Therefore while it is feasible to do this, robust evidence of benefit would be required to justify the resource requirements. |
| <b>Certainty of evidence of required resources</b><br>What is the certainty of the evidence of resource requirements (costs)?                                                                                                                                                                                  |                                                                                                                                                                                                                             |
| <b>JUDGEMENT</b>                                                                                                                                                                                                                                                                                               | <b>RESEARCH EVIDENCE</b>                                                                                                                                                                                                    |

|                                                                                                                                                                                                                                                                                                                         |                                                                                                                                  |
|-------------------------------------------------------------------------------------------------------------------------------------------------------------------------------------------------------------------------------------------------------------------------------------------------------------------------|----------------------------------------------------------------------------------------------------------------------------------|
| <ul style="list-style-type: none"> <li>○ Very low</li> <li>○ Low</li> <li>● Moderate</li> <li>○ High</li> <li>○ No included studies</li> </ul>                                                                                                                                                                          | Requires availability of eligible donors and staff to process and extract the plasma ready for use.                              |
| <b>Cost effectiveness</b><br>Does the cost-effectiveness of the intervention favor the intervention or the comparison?                                                                                                                                                                                                  |                                                                                                                                  |
| <b>JUDGEMENT</b>                                                                                                                                                                                                                                                                                                        | <b>RESEARCH EVIDENCE</b>                                                                                                         |
| <ul style="list-style-type: none"> <li>○ Favors the comparison</li> <li>● Probably favors the comparison</li> <li>○ Does not favor either the intervention or the comparison</li> <li>○ Probably favors the intervention</li> <li>○ Favors the intervention</li> <li>○ Varies</li> <li>○ No included studies</li> </ul> | There are no benefits to this treatment and therefore no reason to spend time and money to provide availability of the treatment |
| <b>Equity</b><br>What would be the impact on health equity?                                                                                                                                                                                                                                                             |                                                                                                                                  |
| <b>JUDGEMENT</b>                                                                                                                                                                                                                                                                                                        | <b>RESEARCH EVIDENCE</b>                                                                                                         |
| <ul style="list-style-type: none"> <li>○ Reduced</li> <li>○ Probably reduced</li> <li>● Probably no impact</li> </ul>                                                                                                                                                                                                   | Not relevant when there is no evidence to justify administration of the treatment.                                               |

|                                                                                                                                                              |                                                                                  |
|--------------------------------------------------------------------------------------------------------------------------------------------------------------|----------------------------------------------------------------------------------|
| <ul style="list-style-type: none"> <li>○ Probably increased</li> <li>○ Increased</li> <li>○ Varies</li> <li>○ Don't know</li> </ul>                          |                                                                                  |
| <b>Acceptability</b><br>Is the intervention acceptable to key stakeholders?                                                                                  |                                                                                  |
| <b>JUDGEMENT</b>                                                                                                                                             | <b>RESEARCH EVIDENCE</b>                                                         |
| <ul style="list-style-type: none"> <li>○ No</li> <li>● Probably no</li> <li>○ Probably yes</li> <li>○ Yes</li> <li>○ Varies</li> <li>○ Don't know</li> </ul> | In the absence of evidence of benefit, use of the therapy is not acceptable.     |
| <b>Feasibility</b><br>Is the intervention feasible to implement?                                                                                             |                                                                                  |
| <b>JUDGEMENT</b>                                                                                                                                             | <b>RESEARCH EVIDENCE</b>                                                         |
| <ul style="list-style-type: none"> <li>○ No</li> <li>○ Probably no</li> <li>● Probably yes</li> <li>○ Yes</li> <li>○ Varies</li> <li>○ Don't know</li> </ul> | It has been done globally during the pandemic and is therefore clearly feasible. |

## TYPE OF RECOMMENDATION

|                                                |                                                     |                                                                          |                                                 |                                            |
|------------------------------------------------|-----------------------------------------------------|--------------------------------------------------------------------------|-------------------------------------------------|--------------------------------------------|
| Strong recommendation against the intervention | Conditional recommendation against the intervention | Conditional recommendation for either the intervention or the comparison | Conditional recommendation for the intervention | Strong recommendation for the intervention |
|------------------------------------------------|-----------------------------------------------------|--------------------------------------------------------------------------|-------------------------------------------------|--------------------------------------------|

|   |   |   |   |   |
|---|---|---|---|---|
| • | ○ | ○ | ○ | ○ |
|---|---|---|---|---|

## CONCLUSIONS

### Recommendation

The panel recommends NOT to offer convalescent plasma to hospitalised patients with COVID-19 patients (strong recommendation, low quality of evidence)

### Justification

With no clinically meaningful benefits from the treatment and an increase in SAE's, the panel make a strong recommendation against the use of convalescent plasma in COVID-19 patients (strong recommendation, low quality of evidence). The benefit-risk ratio does not qualify the use of this treatment

### Subgroup considerations

We identified not subgroups in which evidence was demonstrated

### Implementation considerations

### Monitoring and evaluation

## Research priorities

The panel do not think there is any need for further randomised controlled trials in convalescent plasma



### PICO Question 13 – monoclonal antibodies strategies

|                                                                                                                                                       |                                                                                                                                                                                                                                                                                                                                                                                                  |
|-------------------------------------------------------------------------------------------------------------------------------------------------------|--------------------------------------------------------------------------------------------------------------------------------------------------------------------------------------------------------------------------------------------------------------------------------------------------------------------------------------------------------------------------------------------------|
| <b>Problem</b><br>Is the problem a priority?                                                                                                          |                                                                                                                                                                                                                                                                                                                                                                                                  |
| <b>JUDGEMENT</b>                                                                                                                                      | <b>RESEARCH EVIDENCE</b>                                                                                                                                                                                                                                                                                                                                                                         |
| <ul style="list-style-type: none"><li>○ No</li><li>○ Probably no</li><li>○ Probably yes</li><li>● Yes</li><li>○ Varies</li><li>○ Don't know</li></ul> | Further treatments to reduce mortality and poor outcomes in severe COVID-19 are urgently needed.                                                                                                                                                                                                                                                                                                 |
| <b>Desirable Effects</b><br>How substantial are the desirable anticipated effects?                                                                    |                                                                                                                                                                                                                                                                                                                                                                                                  |
| <b>JUDGEMENT</b>                                                                                                                                      | <b>RESEARCH EVIDENCE</b>                                                                                                                                                                                                                                                                                                                                                                         |
| <ul style="list-style-type: none"><li>○ Trivial</li><li>○ Small</li><li>● Moderate</li><li>○ Large</li><li>○ Varies</li><li>○ Don't know</li></ul>    | An 18% reduction in mortality of patients with seronegative COVID-19 was shown and trends were seen in the reduction of progression to IMV or MV following the use of monoclonal antibodies in this subpopulation. No meaningful treatment responses were seen in any other outcomes. Seropositive patients did not response to treatment with no significant benefits across multiple outcomes. |
| <b>Undesirable Effects</b><br>How substantial are the undesirable anticipated effects?                                                                |                                                                                                                                                                                                                                                                                                                                                                                                  |
| <b>JUDGEMENT</b>                                                                                                                                      | <b>RESEARCH EVIDENCE</b>                                                                                                                                                                                                                                                                                                                                                                         |

|                                                                                                                                                                                                               |                                                                                                                                                                                                                                                                                                                                                                                                                       |
|---------------------------------------------------------------------------------------------------------------------------------------------------------------------------------------------------------------|-----------------------------------------------------------------------------------------------------------------------------------------------------------------------------------------------------------------------------------------------------------------------------------------------------------------------------------------------------------------------------------------------------------------------|
| <ul style="list-style-type: none"> <li>○ Large</li> <li>○ Moderate</li> <li>○ Small</li> <li>● Trivial</li> <li>○ Varies</li> <li>○ Don't know</li> </ul>                                                     | No clinically meaningful undesirable effects were seen.                                                                                                                                                                                                                                                                                                                                                               |
| <b>Certainty of evidence</b><br>What is the overall certainty of the evidence of effects?                                                                                                                     |                                                                                                                                                                                                                                                                                                                                                                                                                       |
| <b>JUDGEMENT</b>                                                                                                                                                                                              | <b>RESEARCH EVIDENCE</b>                                                                                                                                                                                                                                                                                                                                                                                              |
| <ul style="list-style-type: none"> <li>○ Very low</li> <li>○ Low</li> <li>● Moderate</li> <li>○ High</li> <li>○ No included studies</li> </ul>                                                                | There is a moderate certainty to the evidence provided as there are only two trials using monoclonal antibodies in hospitalised patients and both beneficial and detrimental effects are seen in the majority of outcomes. Only the seronegative subpopulation in RECOVERY showed a clear clinical benefit. Mortality and proportion discharged were the only two outcomes which were comparable between both trials. |
| <b>Values</b><br>Is there important uncertainty about or variability in how much people value the main outcomes?                                                                                              |                                                                                                                                                                                                                                                                                                                                                                                                                       |
| <b>JUDGEMENT</b>                                                                                                                                                                                              | <b>RESEARCH EVIDENCE</b>                                                                                                                                                                                                                                                                                                                                                                                              |
| <ul style="list-style-type: none"> <li>○ Important uncertainty or variability</li> <li>○ Possibly important uncertainty or variability</li> <li>○ Probably no important uncertainty or variability</li> </ul> | All variables were deemed to be important or critical.                                                                                                                                                                                                                                                                                                                                                                |

|                                                                                                                                                                                                                                                                                                                |                                                                                                                                                                                                                                                                                                                      |
|----------------------------------------------------------------------------------------------------------------------------------------------------------------------------------------------------------------------------------------------------------------------------------------------------------------|----------------------------------------------------------------------------------------------------------------------------------------------------------------------------------------------------------------------------------------------------------------------------------------------------------------------|
| <ul style="list-style-type: none"> <li>• No important uncertainty or variability</li> </ul>                                                                                                                                                                                                                    |                                                                                                                                                                                                                                                                                                                      |
| <b>Balance of effects</b><br>Does the balance between desirable and undesirable effects favor the intervention or the comparison?                                                                                                                                                                              |                                                                                                                                                                                                                                                                                                                      |
| <b>JUDGEMENT</b>                                                                                                                                                                                                                                                                                               | <b>RESEARCH EVIDENCE</b>                                                                                                                                                                                                                                                                                             |
| <ul style="list-style-type: none"> <li>○ Favors the comparison</li> <li>○ Probably favors the comparison</li> <li>○ Does not favor either the intervention or the comparison</li> <li>• Probably favors the intervention</li> <li>○ Favors the intervention</li> <li>○ Varies</li> <li>○ Don't know</li> </ul> | <p>Although the effects are small, they trend towards beneficial and are clinically meaningful in the most critical outcomes such as mortality.</p>                                                                                                                                                                  |
| <b>Resources required</b><br>How large are the resource requirements (costs)?                                                                                                                                                                                                                                  |                                                                                                                                                                                                                                                                                                                      |
| <b>JUDGEMENT</b>                                                                                                                                                                                                                                                                                               | <b>RESEARCH EVIDENCE</b>                                                                                                                                                                                                                                                                                             |
| <ul style="list-style-type: none"> <li>• Large costs</li> <li>○ Moderate costs</li> <li>○ Negligible costs and savings</li> <li>○ Moderate savings</li> <li>○ Large savings</li> <li>○ Varies</li> <li>○ Don't know</li> </ul>                                                                                 | <p>Experience from clinicians across Europe is that the therapy is difficult to acquire, and availability and cost are therefore barriers to use. To administer only to seronegative patients requires rapid testing for anti-SARS-CoV-2 spike antibodies which adds to the feasibility/resource considerations.</p> |
| <b>Certainty of evidence of required resources</b><br>What is the certainty of the evidence of resource requirements (costs)?                                                                                                                                                                                  |                                                                                                                                                                                                                                                                                                                      |
| <b>JUDGEMENT</b>                                                                                                                                                                                                                                                                                               | <b>RESEARCH EVIDENCE</b>                                                                                                                                                                                                                                                                                             |

|                                                                                                                                                                                                                                                                                                                         |                                                                                                                                                                             |
|-------------------------------------------------------------------------------------------------------------------------------------------------------------------------------------------------------------------------------------------------------------------------------------------------------------------------|-----------------------------------------------------------------------------------------------------------------------------------------------------------------------------|
| <ul style="list-style-type: none"> <li>○ Very low</li> <li>○ Low</li> <li>○ Moderate</li> <li>○ High</li> <li>● No included studies</li> </ul>                                                                                                                                                                          | <p>The cost of newly designed medication has not been studied in these trials but has been determined by clinician experience from across Europe</p>                        |
| <b>Cost effectiveness</b><br>Does the cost-effectiveness of the intervention favor the intervention or the comparison?                                                                                                                                                                                                  |                                                                                                                                                                             |
| <b>JUDGEMENT</b>                                                                                                                                                                                                                                                                                                        | <b>RESEARCH EVIDENCE</b>                                                                                                                                                    |
| <ul style="list-style-type: none"> <li>○ Favors the comparison</li> <li>● Probably favors the comparison</li> <li>○ Does not favor either the intervention or the comparison</li> <li>○ Probably favors the intervention</li> <li>○ Favors the intervention</li> <li>○ Varies</li> <li>○ No included studies</li> </ul> | <p>Not fully established but in view of the mortality benefit and need to administer only to a high-risk subgroup without spike antibodies, this may be cost-effective.</p> |
| <b>Equity</b><br>What would be the impact on health equity?                                                                                                                                                                                                                                                             |                                                                                                                                                                             |
| <b>JUDGEMENT</b>                                                                                                                                                                                                                                                                                                        | <b>RESEARCH EVIDENCE</b>                                                                                                                                                    |
| <ul style="list-style-type: none"> <li>○ Reduced</li> <li>○ Probably reduced</li> <li>○ Probably no impact</li> </ul>                                                                                                                                                                                                   | <p>Given the feasibility issues and cost it is unlikely this can be delivered in all healthcare systems, likely contributing to health inequalities.</p>                    |

|                                                                                                                                                              |                                                                                                                                                                                                                                                                                                                                                                                                                                          |
|--------------------------------------------------------------------------------------------------------------------------------------------------------------|------------------------------------------------------------------------------------------------------------------------------------------------------------------------------------------------------------------------------------------------------------------------------------------------------------------------------------------------------------------------------------------------------------------------------------------|
| <ul style="list-style-type: none"> <li>• Probably increased</li> <li>○ Increased</li> <li>○ Varies</li> <li>○ Don't know</li> </ul>                          |                                                                                                                                                                                                                                                                                                                                                                                                                                          |
| <b>Acceptability</b><br>Is the intervention acceptable to key stakeholders?                                                                                  |                                                                                                                                                                                                                                                                                                                                                                                                                                          |
| <b>JUDGEMENT</b>                                                                                                                                             | <b>RESEARCH EVIDENCE</b>                                                                                                                                                                                                                                                                                                                                                                                                                 |
| <ul style="list-style-type: none"> <li>○ No</li> <li>○ Probably no</li> <li>○ Probably yes</li> <li>○ Yes</li> <li>○ Varies</li> <li>• Don't know</li> </ul> | The treatments have never been used before as they are designed to specifically target the spike protein of SARS-CoV-2                                                                                                                                                                                                                                                                                                                   |
| <b>Feasibility</b><br>Is the intervention feasible to implement?                                                                                             |                                                                                                                                                                                                                                                                                                                                                                                                                                          |
| <b>JUDGEMENT</b>                                                                                                                                             | <b>RESEARCH EVIDENCE</b>                                                                                                                                                                                                                                                                                                                                                                                                                 |
| <ul style="list-style-type: none"> <li>○ No</li> <li>○ Probably no</li> <li>• Probably yes</li> <li>○ Yes</li> <li>○ Varies</li> <li>○ Don't know</li> </ul> | Similar infusions are easy to administer and readily available therefore it is not expected this infusion would be any different. Obtaining an antibody test rapidly in hospitalised patients requires setting up a testing system. The frequency of seronegative patients in an era of widespread vaccination is unknown.<br><br>Note that the available evidence was for a single combination of antibodies- casirivimab and imdevimab |

## TYPE OF RECOMMENDATION

|                                                |                                                     |                                                                          |                                                 |                                            |
|------------------------------------------------|-----------------------------------------------------|--------------------------------------------------------------------------|-------------------------------------------------|--------------------------------------------|
| Strong recommendation against the intervention | Conditional recommendation against the intervention | Conditional recommendation for either the intervention or the comparison | Conditional recommendation for the intervention | Strong recommendation for the intervention |
|------------------------------------------------|-----------------------------------------------------|--------------------------------------------------------------------------|-------------------------------------------------|--------------------------------------------|

|   |   |   |   |   |
|---|---|---|---|---|
| ○ | ○ | ○ | ● | ○ |
|---|---|---|---|---|

## CONCLUSIONS

### Recommendation

The panel suggests to offer a combination of casirivimab and imdevimab to patients hospitalised with COVID-19 who have no detectable SARS-CoV-2 antibodies (seronegative). (conditional recommendation, moderate quality of evidence)

The panel recommends NOT to offer monoclonal antibodies to patients hospitalised with COVID-19 who have detectable SARS-CoV-2 antibodies (seropositive) or where SARS-CoV-2 antibody status is unknown. (strong recommendation, moderate quality of evidence)

### Justification

This therapy provides clinical benefits in seronegative patients when administered.

### Subgroup considerations

Other than the beneficial effect of treatment in the seronegative population, the RECOVERY trial found no effect modification in other subgroups.

### Implementation considerations

Availability of seronegative testing, drug availability and cost all need to be considered.

### Monitoring and evaluation

## Research priorities

Most trials were conducted in the pre-vaccine era and with previous variants. In view of the mutations in the spike protein evident in the omicron variant data are required on the benefit of antibody treatments against new variants and in individuals who have received prior vaccination.

## PICO Question 14 – IL-1 receptor antagonist monoclonal antibody

|                                                                                                                                                                                                                                                                                          |                                                                                                                                                                                                                                                                                                                                                                                                                                                                                                                                    |
|------------------------------------------------------------------------------------------------------------------------------------------------------------------------------------------------------------------------------------------------------------------------------------------|------------------------------------------------------------------------------------------------------------------------------------------------------------------------------------------------------------------------------------------------------------------------------------------------------------------------------------------------------------------------------------------------------------------------------------------------------------------------------------------------------------------------------------|
| <b>Problem</b><br>Is the problem a priority?                                                                                                                                                                                                                                             |                                                                                                                                                                                                                                                                                                                                                                                                                                                                                                                                    |
| <b>JUDGEMENT</b>                                                                                                                                                                                                                                                                         | <b>RESEARCH EVIDENCE</b>                                                                                                                                                                                                                                                                                                                                                                                                                                                                                                           |
| <ul style="list-style-type: none"><li><input type="radio"/> No</li><li><input type="radio"/> Probably no</li><li><input type="radio"/> Probably yes</li><li><input checked="" type="radio"/> Yes</li><li><input type="radio"/> Varies</li><li><input type="radio"/> Don't know</li></ul> | Yes. There is a need for additional anti-inflammatory/immunomodulatory treatments for hospitalised patients with COVID-19. Evidence suggests the involvement of Interleukin-6 in the pathogenesis of severe COVID-19. This has led to the use of anti-IL-6 therapies in clinical practice. There is therefore a need to know whether these treatments improve clinical outcomes such as mortality or requirement for mechanical ventilation.                                                                                       |
| <b>Desirable Effects</b><br>How substantial are the desirable anticipated effects?                                                                                                                                                                                                       |                                                                                                                                                                                                                                                                                                                                                                                                                                                                                                                                    |
| <b>JUDGEMENT</b>                                                                                                                                                                                                                                                                         | <b>RESEARCH EVIDENCE</b>                                                                                                                                                                                                                                                                                                                                                                                                                                                                                                           |
| <ul style="list-style-type: none"><li><input type="radio"/> Trivial</li><li><input checked="" type="radio"/> Small</li><li><input type="radio"/> Moderate</li><li><input type="radio"/> Large</li><li><input type="radio"/> Varies</li><li><input type="radio"/> Don't know</li></ul>    | <p>A reduction in time to hospital discharge and progression to severe disease or death (as a composite endpoint) were the only beneficial treatment responses noted from the use of IL-1 receptor antagonists, however when looking at the outcomes as separate endpoints (i.e. mortality alone rather than as part of a composite) there was not the same evident benefit.</p> <p>One study which used a biomarker to select patients showed highly significant benefits. Independent validation of these data are required.</p> |
| <b>Undesirable Effects</b><br>How substantial are the undesirable anticipated effects?                                                                                                                                                                                                   |                                                                                                                                                                                                                                                                                                                                                                                                                                                                                                                                    |
| <b>JUDGEMENT</b>                                                                                                                                                                                                                                                                         | <b>RESEARCH EVIDENCE</b>                                                                                                                                                                                                                                                                                                                                                                                                                                                                                                           |



|                                                                                                                                                                                                               |                                                                                                                                        |
|---------------------------------------------------------------------------------------------------------------------------------------------------------------------------------------------------------------|----------------------------------------------------------------------------------------------------------------------------------------|
| <ul style="list-style-type: none"> <li>○ Large</li> <li>○ Moderate</li> <li>○ Small</li> <li>● Trivial</li> <li>○ Varies</li> <li>○ Don't know</li> </ul>                                                     | <p>There were no notable undesirable effects. As with all immunosuppressive treatments there is a risk of opportunistic infection.</p> |
| <b>Certainty of evidence</b><br>What is the overall certainty of the evidence of effects?                                                                                                                     |                                                                                                                                        |
| <b>JUDGEMENT</b>                                                                                                                                                                                              | <b>RESEARCH EVIDENCE</b>                                                                                                               |
| <ul style="list-style-type: none"> <li>○ Very low</li> <li>○ Low</li> <li>● Moderate</li> <li>○ High</li> <li>○ No included studies</li> </ul>                                                                | <p>The four available trials provided a moderate certainty of evidence</p>                                                             |
| <b>Values</b><br>Is there important uncertainty about or variability in how much people value the main outcomes?                                                                                              |                                                                                                                                        |
| <b>JUDGEMENT</b>                                                                                                                                                                                              | <b>RESEARCH EVIDENCE</b>                                                                                                               |
| <ul style="list-style-type: none"> <li>○ Important uncertainty or variability</li> <li>○ Possibly important uncertainty or variability</li> <li>○ Probably no important uncertainty or variability</li> </ul> | <p>The panel members agreed all the outcomes were important or critical</p>                                                            |

|                                                                                                                                                                                                                                                                                                                |                                                                                                                                                                                                                                                                                                                                                                                                                                                                                                                            |
|----------------------------------------------------------------------------------------------------------------------------------------------------------------------------------------------------------------------------------------------------------------------------------------------------------------|----------------------------------------------------------------------------------------------------------------------------------------------------------------------------------------------------------------------------------------------------------------------------------------------------------------------------------------------------------------------------------------------------------------------------------------------------------------------------------------------------------------------------|
| <ul style="list-style-type: none"> <li>• No important uncertainty or variability</li> </ul>                                                                                                                                                                                                                    |                                                                                                                                                                                                                                                                                                                                                                                                                                                                                                                            |
| <b>Balance of effects</b><br>Does the balance between desirable and undesirable effects favor the intervention or the comparison?                                                                                                                                                                              |                                                                                                                                                                                                                                                                                                                                                                                                                                                                                                                            |
| <b>JUDGEMENT</b>                                                                                                                                                                                                                                                                                               | <b>RESEARCH EVIDENCE</b>                                                                                                                                                                                                                                                                                                                                                                                                                                                                                                   |
| <ul style="list-style-type: none"> <li>○ Favors the comparison</li> <li>○ Probably favors the comparison</li> <li>○ Does not favor either the intervention or the comparison</li> <li>• Probably favors the intervention</li> <li>○ Favors the intervention</li> <li>○ Varies</li> <li>○ Don't know</li> </ul> | The panel agree more data is required for definitive evidence of benefit of this treatment. It was noted that the results for anti-IL1 therapy cannot be considered in isolation. Systematic corticosteroids, IL-6 receptor monoclonal antibodies and most recently JAK inhibitors have evidence in their favour in this indication. Therefore while there are some benefits associated with anti-IL1, they would not be selected in preference to these other treatments that have a larger or stronger body of evidence. |
| <b>Resources required</b><br>How large are the resource requirements (costs)?                                                                                                                                                                                                                                  |                                                                                                                                                                                                                                                                                                                                                                                                                                                                                                                            |
| <b>JUDGEMENT</b>                                                                                                                                                                                                                                                                                               | <b>RESEARCH EVIDENCE</b>                                                                                                                                                                                                                                                                                                                                                                                                                                                                                                   |
| <ul style="list-style-type: none"> <li>○ Large costs</li> <li>○ Moderate costs</li> <li>○ Negligible costs and savings</li> <li>○ Moderate savings</li> <li>○ Large savings</li> <li>• Varies</li> <li>○ Don't know</li> </ul>                                                                                 | These drugs are relatively expensive                                                                                                                                                                                                                                                                                                                                                                                                                                                                                       |
| <b>Certainty of evidence of required resources</b><br>What is the certainty of the evidence of resource requirements (costs)?                                                                                                                                                                                  |                                                                                                                                                                                                                                                                                                                                                                                                                                                                                                                            |
| <b>JUDGEMENT</b>                                                                                                                                                                                                                                                                                               | <b>RESEARCH EVIDENCE</b>                                                                                                                                                                                                                                                                                                                                                                                                                                                                                                   |

|                                                                                                                                                                                                                                                                                                                         |                                                                                                                                                                               |
|-------------------------------------------------------------------------------------------------------------------------------------------------------------------------------------------------------------------------------------------------------------------------------------------------------------------------|-------------------------------------------------------------------------------------------------------------------------------------------------------------------------------|
| <ul style="list-style-type: none"> <li>○ Very low</li> <li>○ Low</li> <li>○ Moderate</li> <li>● High</li> <li>○ No included studies</li> </ul>                                                                                                                                                                          | <p>No studies tackled the cost-effectiveness of IL-1 receptor antagonists.</p>                                                                                                |
| <b>Cost effectiveness</b><br>Does the cost-effectiveness of the intervention favor the intervention or the comparison?                                                                                                                                                                                                  |                                                                                                                                                                               |
| <b>JUDGEMENT</b>                                                                                                                                                                                                                                                                                                        | <b>RESEARCH EVIDENCE</b>                                                                                                                                                      |
| <ul style="list-style-type: none"> <li>○ Favors the comparison</li> <li>○ Probably favors the comparison</li> <li>○ Does not favor either the intervention or the comparison</li> <li>○ Probably favors the intervention</li> <li>○ Favors the intervention</li> <li>○ Varies</li> <li>● No included studies</li> </ul> | <p>We identified no studies of the cost effectiveness of the treatment. The clinical effectiveness is not yet fully established.</p>                                          |
| <b>Equity</b><br>What would be the impact on health equity?                                                                                                                                                                                                                                                             |                                                                                                                                                                               |
| <b>JUDGEMENT</b>                                                                                                                                                                                                                                                                                                        | <b>RESEARCH EVIDENCE</b>                                                                                                                                                      |
| <ul style="list-style-type: none"> <li>○ Reduced</li> <li>○ Probably reduced</li> <li>● Probably no impact</li> </ul>                                                                                                                                                                                                   | <p>No such assessment was made. As there are few risks with possible benefits, but the treatment may not be universally available there is currently no impact on equity.</p> |

|                                                                                                                                                              |                                                                                                                                                                   |
|--------------------------------------------------------------------------------------------------------------------------------------------------------------|-------------------------------------------------------------------------------------------------------------------------------------------------------------------|
| <ul style="list-style-type: none"> <li>○ Probably increased</li> <li>○ Increased</li> <li>○ Varies</li> <li>○ Don't know</li> </ul>                          |                                                                                                                                                                   |
| <b>Acceptability</b><br>Is the intervention acceptable to key stakeholders?                                                                                  |                                                                                                                                                                   |
| <b>JUDGEMENT</b>                                                                                                                                             | <b>RESEARCH EVIDENCE</b>                                                                                                                                          |
| <ul style="list-style-type: none"> <li>○ No</li> <li>○ Probably no</li> <li>○ Probably yes</li> <li>● Yes</li> <li>○ Varies</li> <li>○ Don't know</li> </ul> | Anakinra is widely used for other conditions and therefore should be acceptable                                                                                   |
| <b>Feasibility</b><br>Is the intervention feasible to implement?                                                                                             |                                                                                                                                                                   |
| <b>JUDGEMENT</b>                                                                                                                                             | <b>RESEARCH EVIDENCE</b>                                                                                                                                          |
| <ul style="list-style-type: none"> <li>○ No</li> <li>○ Probably no</li> <li>● Probably yes</li> <li>○ Yes</li> <li>○ Varies</li> <li>○ Don't know</li> </ul> | A Anakinra is widely used for other conditions and therefore should be acceptable although costs may need to be considered for some countries/healthcare systems, |

## TYPE OF RECOMMENDATION

|                                                |                                                     |                                                                          |                                                 |                                            |
|------------------------------------------------|-----------------------------------------------------|--------------------------------------------------------------------------|-------------------------------------------------|--------------------------------------------|
| Strong recommendation against the intervention | Conditional recommendation against the intervention | Conditional recommendation for either the intervention or the comparison | Conditional recommendation for the intervention | Strong recommendation for the intervention |
|------------------------------------------------|-----------------------------------------------------|--------------------------------------------------------------------------|-------------------------------------------------|--------------------------------------------|

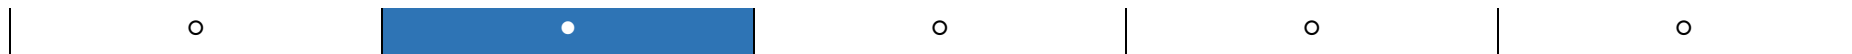

## CONCLUSIONS

### Recommendation

The panel suggests NOT to offer IL-1 receptor antagonist monoclonal antibodies for hospitalised patients with COVID-19 (conditional recommendation, moderate quality of evidence)

### Justification

Not enough evidence to recommend the use of the therapy however it has been recognised that there could be beneficial effects seen if more trial data becomes available. When there are more established therapies available, anakinra should not be used. The conditional recommendation allows for the use of the therapy when there are no other therapies available and acknowledges there are likely to be some patients who will benefit from anakinra.

### Subgroup considerations

Kyriazopoulou et al used a biomarker (urokinaseplasminogen receptor) to identify patients eligible for anakinra treatment, the results from this study were slightly more beneficial and therefore more work on this subgroup analysis may be beneficial.

### Implementation considerations

### Monitoring and evaluation

## Research priorities

Further randomised controlled trials in anti-IL-1 receptor therapy is required, including validation of whether a biomarker guided approach provides benefit over an empirical approach.

## PICO Question 15 – JAK inhibitors strategies

| <b>Problem</b><br>Is the problem a priority?                                                                                                                 |                                                                                                                                                                                                                                                                                                                                                                                                                                                                    |
|--------------------------------------------------------------------------------------------------------------------------------------------------------------|--------------------------------------------------------------------------------------------------------------------------------------------------------------------------------------------------------------------------------------------------------------------------------------------------------------------------------------------------------------------------------------------------------------------------------------------------------------------|
| JUDGEMENT                                                                                                                                                    | RESEARCH EVIDENCE                                                                                                                                                                                                                                                                                                                                                                                                                                                  |
| <ul style="list-style-type: none"> <li>○ No</li> <li>○ Probably no</li> <li>○ Probably yes</li> <li>● Yes</li> <li>○ Varies</li> <li>○ Don't know</li> </ul> | Yes. There is a need for additional anti-inflammatory/immunomodulatory treatments for hospitalised patients with COVID-19. Evidence suggests the involvement of the JAK pathway in the pathogenesis of severe COVID-19. Mortality in severe patients remains high despite the availability of corticosteroids and therefore new therapies are required.                                                                                                            |
| <b>Desirable Effects</b><br>How substantial are the desirable anticipated effects?                                                                           |                                                                                                                                                                                                                                                                                                                                                                                                                                                                    |
| JUDGEMENT                                                                                                                                                    | RESEARCH EVIDENCE                                                                                                                                                                                                                                                                                                                                                                                                                                                  |
| <ul style="list-style-type: none"> <li>○ Trivial</li> <li>○ Small</li> <li>○ Moderate</li> <li>● Large</li> <li>○ Varies</li> <li>○ Don't know</li> </ul>    | Desirable effects seen in decreased mortality and progression to more severe disease requiring non-invasive ventilation, high flow nasal oxygen and mechanical ventilation. A reduced number of serious adverse events was also noted in those treated with JAK inhibitors compared with those in the standard care arm. The magnitude of mortality benefit seen in the pooled data in the meta-analysis was the largest effect seen for any intervention to date. |
| <b>Undesirable Effects</b><br>How substantial are the undesirable anticipated effects?                                                                       |                                                                                                                                                                                                                                                                                                                                                                                                                                                                    |
| JUDGEMENT                                                                                                                                                    | RESEARCH EVIDENCE                                                                                                                                                                                                                                                                                                                                                                                                                                                  |

|                                                                                                                                                           |                                                                                                                                                   |
|-----------------------------------------------------------------------------------------------------------------------------------------------------------|---------------------------------------------------------------------------------------------------------------------------------------------------|
| <ul style="list-style-type: none"> <li>○ Large</li> <li>○ Moderate</li> <li>○ Small</li> <li>● Trivial</li> <li>○ Varies</li> <li>○ Don't know</li> </ul> | No significant undesirable events were seen in association with treatment of JAK inhibitors in the clinical trials included in the meta-analysis. |
|-----------------------------------------------------------------------------------------------------------------------------------------------------------|---------------------------------------------------------------------------------------------------------------------------------------------------|

## Certainty of evidence

What is the overall certainty of the evidence of effects?

| JUDGEMENT                                                                                                                                      | RESEARCH EVIDENCE                                                                                                                                                                                                                                                                                                                                                                                                                                                                                          |
|------------------------------------------------------------------------------------------------------------------------------------------------|------------------------------------------------------------------------------------------------------------------------------------------------------------------------------------------------------------------------------------------------------------------------------------------------------------------------------------------------------------------------------------------------------------------------------------------------------------------------------------------------------------|
| <ul style="list-style-type: none"> <li>○ Very low</li> <li>○ Low</li> <li>● Moderate</li> <li>○ High</li> <li>○ No included studies</li> </ul> | <p>Despite low certainty evidence being shown in the adverse events and improvement in 2+ point ordinal scale, there were high certainty evidence showing the intervention is beneficial in reducing the progression of disease severity and critical outcomes.</p> <p>It was noted that the primary outcome for the trials included were negative but that pooled data from secondary endpoints provided much of the benefit observed in the meta-analysis. This impacts upon the level of certainty.</p> |

## Values

Is there important uncertainty about or variability in how much people value the main outcomes?

| JUDGEMENT                                                                                                                                                                          | RESEARCH EVIDENCE                                                                                            |
|------------------------------------------------------------------------------------------------------------------------------------------------------------------------------------|--------------------------------------------------------------------------------------------------------------|
| <ul style="list-style-type: none"> <li>○ Important uncertainty or variability</li> <li>○ Possibly important uncertainty or variability</li> <li>○ Probably no important</li> </ul> | No important uncertainty, all outcomes were decided as important or critical from all the taskforce members. |



|                                                                                                                                                                                                                          |                                                                                                                                                                                                                                                                                               |
|--------------------------------------------------------------------------------------------------------------------------------------------------------------------------------------------------------------------------|-----------------------------------------------------------------------------------------------------------------------------------------------------------------------------------------------------------------------------------------------------------------------------------------------|
| uncertainty or variability<br>• No important uncertainty or variability                                                                                                                                                  |                                                                                                                                                                                                                                                                                               |
| <b>Balance of effects</b><br>Does the balance between desirable and undesirable effects favor the intervention or the comparison?                                                                                        |                                                                                                                                                                                                                                                                                               |
| <b>JUDGEMENT</b>                                                                                                                                                                                                         | <b>RESEARCH EVIDENCE</b>                                                                                                                                                                                                                                                                      |
| ○ Favors the comparison<br>• Probably favors the comparison<br>○ Does not favor either the intervention or the comparison<br>○ Probably favors the intervention<br>○ Favors the intervention<br>○ Varies<br>○ Don't know | Due to high certainty evidence showing reduction in mortality rate and progression to more severe disease state, and no detrimental effect from the intervention on health status, it is likely JAK inhibitors have a favourable effect over and above that of standard care treatment alone. |
| <b>Resources required</b><br>How large are the resource requirements (costs)?                                                                                                                                            |                                                                                                                                                                                                                                                                                               |
| <b>JUDGEMENT</b>                                                                                                                                                                                                         | <b>RESEARCH EVIDENCE</b>                                                                                                                                                                                                                                                                      |
| ○ Large costs<br>• Moderate costs<br>○ Negligible costs and savings<br>○ Moderate savings<br>○ Large savings<br>○ Varies<br>○ Don't know                                                                                 | This is not known as it has not been formally assessed however the therapy is expensive. It is possible that if found to be beneficial in real-life the treatment would be associated with cost savings.                                                                                      |

## Certainty of evidence of required resources

What is the certainty of the evidence of resource requirements (costs)?

| JUDGEMENT                                                                                                                                | RESEARCH EVIDENCE                                                                                                        |
|------------------------------------------------------------------------------------------------------------------------------------------|--------------------------------------------------------------------------------------------------------------------------|
| <ul style="list-style-type: none"><li>○ Very low</li><li>○ Low</li><li>○ Moderate</li><li>○ High</li><li>● No included studies</li></ul> | This is highly uncertain. The treatment has a cost, but this may or may not be offset by the beneficial clinical effects |

## Cost effectiveness

Does the cost-effectiveness of the intervention favor the intervention or the comparison?

| JUDGEMENT                                                                                                                                                                                                                                                                                                       | RESEARCH EVIDENCE                                                                                                     |
|-----------------------------------------------------------------------------------------------------------------------------------------------------------------------------------------------------------------------------------------------------------------------------------------------------------------|-----------------------------------------------------------------------------------------------------------------------|
| <ul style="list-style-type: none"><li>○ Favors the comparison</li><li>○ Probably favors the comparison</li><li>○ Does not favor either the intervention or the comparison</li><li>○ Probably favors the intervention</li><li>○ Favors the intervention</li><li>● Varies</li><li>○ No included studies</li></ul> | Availability and expense of the therapy makes this a variable judgement without a formal cost-effectiveness analysis. |

## Equity

What would be the impact on health equity?

| JUDGEMENT                                                                                                                                                                                                        | RESEARCH EVIDENCE                                                                                                                           |
|------------------------------------------------------------------------------------------------------------------------------------------------------------------------------------------------------------------|---------------------------------------------------------------------------------------------------------------------------------------------|
| <ul style="list-style-type: none"> <li>○ Reduced</li> <li>● Probably reduced</li> <li>○ Probably no impact</li> <li>○ Probably increased</li> <li>○ Increased</li> <li>○ Varies</li> <li>○ Don't know</li> </ul> | As with any new therapy that is expensive it has the potential to increase health inequalities if the treatment is not accessible globally. |
| <b>Acceptability</b><br>Is the intervention acceptable to key stakeholders?                                                                                                                                      |                                                                                                                                             |
| JUDGEMENT                                                                                                                                                                                                        | RESEARCH EVIDENCE                                                                                                                           |
| <ul style="list-style-type: none"> <li>○ No</li> <li>● Probably no</li> <li>○ Probably yes</li> <li>○ Yes</li> <li>○ Varies</li> <li>○ Don't know</li> </ul>                                                     | Availability and expense does not make this therapy feasible in all healthcare systems                                                      |
| <b>Feasibility</b><br>Is the intervention feasible to implement?                                                                                                                                                 |                                                                                                                                             |
| JUDGEMENT                                                                                                                                                                                                        | RESEARCH EVIDENCE                                                                                                                           |
| <ul style="list-style-type: none"> <li>● No</li> <li>○ Probably no</li> <li>○ Probably yes</li> <li>○ Yes</li> <li>○ Varies</li> <li>○ Don't know</li> </ul>                                                     | not accessible in every country                                                                                                             |

TYPE OF RECOMMENDATION

|                                                     |                                                          |                                                                               |                                                      |                                                 |
|-----------------------------------------------------|----------------------------------------------------------|-------------------------------------------------------------------------------|------------------------------------------------------|-------------------------------------------------|
| Strong recommendation against the intervention<br>○ | Conditional recommendation against the intervention<br>○ | Conditional recommendation for either the intervention or the comparison<br>○ | Conditional recommendation for the intervention<br>● | Strong recommendation for the intervention<br>○ |
|-----------------------------------------------------|----------------------------------------------------------|-------------------------------------------------------------------------------|------------------------------------------------------|-------------------------------------------------|

CONCLUSIONS

Recommendation

Justification

JAK inhibitors appear to reduce mortality and improve other outcomes. While the RECOVERY trial showed the efficacy and safety of baricitinib was not affected by co-administration with tocilizumab, combination therapy has economic and clinical considerations and so may not be appropriate for all patients. Those at highest risk of deterioration such as those requiring non-invasive ventilation may be the optimal patient population and indeed this subgroup had the highest efficacy of baricitinib treatment.

Subgroup considerations

No relevant subgroup effects were observed.

Implementation considerations

## Monitoring and evaluation

A full blood count, liver function tests, and kidney function tests should be obtained in all patients before JAK inhibitors are used and during treatment as clinically indicated. Screening for viral hepatitis and tuberculosis should be considered. Considering its immunosuppressive effects, all patients receiving JAK inhibitors should be monitored for secondary infections. The safety of JAK inhibitors in pregnancy is unknown.

## Research priorities

Baricitinib is included in the RECOVERY trial and so further large scale data on this treatment are expected shortly.
