# Supplementary material
Source: HighWire-hosted journal article supplement (https://erj.ersjournals.com/content/57/4/2100048)
Supplement: inline-supplementary-material-3 [file inline-supplementary-material-3.pdf]

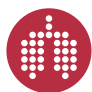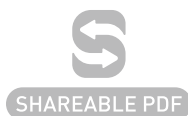

# Management of hospitalised adults with coronavirus disease 2019 (COVID-19): a European Respiratory Society living guideline

James D. Chalmers <sup>1,2,3</sup>, Megan L. Crichton<sup>1</sup>, Pieter C. Goeminne<sup>2</sup>, Bin Cao<sup>3</sup>, Marc Humbert <sup>4</sup>, Michal Shteinberg <sup>5</sup>, Katerina M. Antoniou<sup>6</sup>, Charlotte Suppli Ulrik <sup>7</sup>, Helen Parks<sup>8</sup>, Chen Wang<sup>9</sup>, Thomas Vandendriessche<sup>10</sup>, Jieming Qu<sup>11,12</sup>, Daiana Stolz<sup>13,14,15</sup>, Christopher Brightling<sup>16</sup>, Tobias Welte <sup>17</sup>, Stefano Aliberti <sup>18,19</sup>, Anita K. Simonds<sup>20</sup>, Thomy Tonia<sup>21</sup> and Nicolas Roche<sup>22,23</sup>

<sup>1</sup>School of Medicine, University of Dundee, Dundee, UK. <sup>2</sup>Department of Respiratory Medicine, AZ Nikolaas, Sint-Niklaas, Belgium. <sup>3</sup>Department of Respiratory and Critical Care Medicine, Clinical Microbiology and Infectious Disease Lab, China-Japan Friendship Hospital, National Center for Respiratory Medicine, Institute of Respiratory Medicine, Chinese Academy of Medical Science, National Clinical Research Center of Respiratory Diseases, Beijing, China. <sup>4</sup>Service de Pneumologie et Soins Intensifs, Hôpital Bicêtre, Assistance Publique-Hôpitaux de Paris (AP-HP); Université Paris-Saclay; Inserm UMR\_S 999, Le Kremlin Bicêtre, France. <sup>5</sup>Pulmonology institute and CF Center, Carmel Medical Center and the Technion-Israel Institute of Technology, Haifa, Israel. <sup>6</sup>Laboratory of Molecular and Cellular Pneumology, Department of Respiratory Medicine, School of Medicine, University of Crete, Heraklion, Greece. <sup>7</sup>Department of Respiratory Medicine, Copenhagen University Hospital-Hvidovre Hospital, Hvidovre, Denmark. <sup>8</sup>European Lung Foundation, Sheffield, UK. <sup>9</sup>Department of Pulmonary and Critical Care Medicine, Center of Respiratory Medicine, China-Japan Friendship Hospital, Chinese Academy of Medical Sciences & Peking Union Medical College, National Clinical Research Center of Respiratory Diseases, Beijing, China. <sup>10</sup>KU Leuven Libraries - 2Bergen - Learning Centre Désiré Collen, Leuven, Belgium. <sup>11</sup>Department of Pulmonary and Critical Care Medicine, Ruijin Hospital, Shanghai, China. <sup>12</sup>Institute of Respiratory Diseases, Shanghai Jiao Tong University School of Medicine, Shanghai, China. <sup>13</sup>Clinic of Respiratory Medicine and Pulmonary Cell Research, University Hospital Basel, Basel, Switzerland. <sup>14</sup>Clinic of Respiratory Medicine, Medical Center – University of Freiburg, Freiburg, Germany. <sup>15</sup>Faculty of Medicine, University of Freiburg, Freiburg, Germany. <sup>16</sup>Institute for Lung Health, Leicester NIHR BRC, University of Leicester, Leicester, UK. <sup>17</sup>Medizinische Hochschule Hannover, Direktor der Abteilung Pneumologie, Hannover, Germany. <sup>18</sup>Department of Biomedical Sciences, Humanitas University, Pieve Emanuele, Milan, Italy. <sup>19</sup>IRCCS Humanitas Research Hospital, Respiratory Unit, Rozzano, Italy. <sup>20</sup>Sleep and Ventilation Unit, Royal Brompton and Harefield Hospital, Guys and St Thomas NHS Foundation Trust, London, UK. <sup>21</sup>Institute of Social and Preventive Medicine, University Bern, Bern, Switzerland. <sup>22</sup>Respiratory Medicine, Cochin Hospital, APHP Centre-University of Paris, Cochin Institute (INSERM UMR1016), Paris, France. <sup>23</sup>J.D. Chalmers and N. Roche are task force co-chairs.

Corresponding author: James D. Chalmers ([jchalmers@dundee.ac.uk](mailto:jchalmers@dundee.ac.uk))

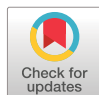

Shareable abstract (@ERSpublications)

The ERS COVID-19 guidelines make recommendations for corticosteroids, anti-IL-6 monoclonal antibodies, baricitinib, anticoagulation and non-invasive respiratory support for hospitalised patients with COVID-19 <https://bit.ly/2OlPniF>

**Cite this article as:** Chalmers JD, Crichton ML, Goeminne PC, *et al.* Management of hospitalised adults with coronavirus disease 2019 (COVID-19): a European Respiratory Society living guideline. *Eur Respir J* 2021; 57: 2100048 [DOI: 10.1183/13993003.00048-2021].

This single-page version can be shared freely online.

Copyright ©The authors 2022.

This version is distributed under the terms of the Creative Commons Attribution Non-Commercial Licence 4.0. For commercial reproduction rights and permissions contact [permissions@ersnet.org](mailto:permissions@ersnet.org)

Received: 16 April 2022  
Accepted: 31 May 2022

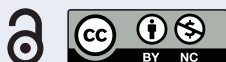

## Abstract

**Introduction** Hospitalised patients with coronavirus disease 2019 (COVID-19) as a result of severe acute respiratory syndrome coronavirus 2 (SARS-CoV-2) infection have a high mortality rate and frequently require non-invasive respiratory support or invasive mechanical ventilation. Optimising and standardising management through evidence-based guidelines may improve quality of care and therefore patient outcomes.

**Methods** A task force from the European Respiratory Society, and endorsed by the Chinese Thoracic Society, identified priority interventions (pharmacological and non-pharmacological) for inclusion in this “living guideline” using the PICO (Population, Intervention, Comparator, Outcomes) format. The GRADE (Grading of Recommendations, Assessment, Development and Evaluations) approach was used for assessing the quality of evidence and strength of recommendations. Systematic literature reviews were performed, and data pooled by meta-analysis where possible. Evidence tables were presented and evidence-to-decision frameworks were used to formulate recommendations.

**Results** Based on the available evidence at the time of guideline update (14 February 2022) the panel makes a strong recommendation in favour of the use of systemic corticosteroids in patients requiring supplementary oxygen or ventilatory support, and of interleukin-6 receptor antagonist monoclonal antibodies or baricitinib for patients requiring supplementary oxygen and for the use of anticoagulation in hospitalised patients. The panel makes a conditional recommendation for continuous positive airway pressure in patients with acute hypoxaemic respiratory failure and for combination treatment with casirivimab and imdevimab in patients who have no detectable SARS-CoV-2 spike antibodies (seronegative) and a susceptible variant. No recommendation was made for remdesivir in patients requiring supplemental oxygen. The panel recommended against multiple therapeutics, including hydroxychloroquine, azithromycin, convalescent plasma, lopinavir-ritonavir and colchicine. Further recommendations for research are made.

**Conclusion** Several interventions reduce mortality and improve clinical outcomes in patients with severe COVID-19 infection. These guidelines will be regularly updated as further evidence becomes available.
